# Supplementary material for: Salt intake assessed by 24 h urinary sodium excretion in a random and opportunistic sample in Australia
Source: PubMed Central journal article supplement — BMJ Open. 2014 Jan 16;4(1):e003720. doi: 10.1136/bmjopen-2013-003720 (PMC3902305; doi:10.1136/bmjopen-2013-003720), 2014-01-16
Supplement: bmjopen-2013-003720.draft_revisions.pdf [file bmjopen-2013-003720.draft_revisions.pdf]

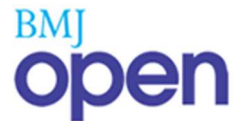

**SALT INTAKE ASSESSED BY 24-HOUR URINARY SODIUM  
EXCRETION IN A RANDOM AND OPPORTUNISTIC SAMPLE IN  
AUSTRALIA**

|                                 |                                                                                                                                                                                                                                                                                                                                                                                                                                                                                                                                                                                                                                                                                                                                                                                                                                                                                             |
|---------------------------------|---------------------------------------------------------------------------------------------------------------------------------------------------------------------------------------------------------------------------------------------------------------------------------------------------------------------------------------------------------------------------------------------------------------------------------------------------------------------------------------------------------------------------------------------------------------------------------------------------------------------------------------------------------------------------------------------------------------------------------------------------------------------------------------------------------------------------------------------------------------------------------------------|
| Journal:                        | <i>BMJ Open</i>                                                                                                                                                                                                                                                                                                                                                                                                                                                                                                                                                                                                                                                                                                                                                                                                                                                                             |
| Manuscript ID:                  | bmjopen-2013-003720                                                                                                                                                                                                                                                                                                                                                                                                                                                                                                                                                                                                                                                                                                                                                                                                                                                                         |
| Article Type:                   | Research                                                                                                                                                                                                                                                                                                                                                                                                                                                                                                                                                                                                                                                                                                                                                                                                                                                                                    |
| Date Submitted by the Author:   | 04-Aug-2013                                                                                                                                                                                                                                                                                                                                                                                                                                                                                                                                                                                                                                                                                                                                                                                                                                                                                 |
| Complete List of Authors:       | Land, Mary-Anne; The George Institute for Global Health, ; The University of Sydney,<br>Webster, Jacqui; The George Institute for Global Health, ; The University of Sydney,<br>Christoforou, Anthea; The George Institute for Global Health, ; The University of Sydney,<br>Praveen, D; The George Institute for Global Health, ; The University of Sydney,<br>Jeffery, Paul; Deakin University,<br>Chalmers, John; The George Institute for Global Health, ; The University of Sydney,<br>Smith, Wayne; New South Wales Health,<br>Woodward, Mark; The George Institute for Global Health, ; The University of Sydney,<br>Barzi, Federica; The George Institute for Global Health, ; The University of Sydney,<br>Nowson, Caryl; Deakin University,<br>Flood, Victoria; The University of Wollongong,<br>Neal, Bruce; The George Institute for Global Health, ; The University of Sydney, |
| <b>Primary Subject Heading</b>: | Public health                                                                                                                                                                                                                                                                                                                                                                                                                                                                                                                                                                                                                                                                                                                                                                                                                                                                               |
| Secondary Subject Heading:      | Complementary medicine, Epidemiology, Global health                                                                                                                                                                                                                                                                                                                                                                                                                                                                                                                                                                                                                                                                                                                                                                                                                                         |
| Keywords:                       | Hypertension < CARDIOLOGY, NUTRITION & DIETETICS, PUBLIC HEALTH                                                                                                                                                                                                                                                                                                                                                                                                                                                                                                                                                                                                                                                                                                                                                                                                                             |
|                                 |                                                                                                                                                                                                                                                                                                                                                                                                                                                                                                                                                                                                                                                                                                                                                                                                                                                                                             |

SCHOLARONE™  
Manuscripts

1  
2  
3  
4  
5  
6  
7  
8  
9

## SALT INTAKE ASSESSED BY 24-HOUR URINARY SODIUM EXCRETION IN A RANDOM AND OPPORTUNISTIC SAMPLE IN AUSTRALIA

10  
11

*Corresponding Author:*

12 Miss Mary-Anne Land  
13 The George Institute for Global Health  
14 PO BOX M201 Missenden Road  
15 Camperdown, NSW, AUSTRALIA  
16 2050.  
17 T: +61 2 9993 4547  
18 E: [maland@georgeinstitute.org.au](mailto:maland@georgeinstitute.org.au)  
19  
20  
21  
22  
23

24  
25 Authors: Mary-Anne LAND<sup>a,b</sup>, Jacqui WEBSTER<sup>a,b</sup>, Anthea CHRISTOFOROU<sup>a,b</sup>, D  
26 PRAVEEN<sup>a,b</sup>, Paul JEFFERY<sup>c</sup>, John CHALMERS<sup>a,b</sup>, Wayne SMITH<sup>d</sup>, Mark  
27 WOODWARD<sup>a,b</sup>, Federica BARZI<sup>a,b</sup>, Caryl NOWSON<sup>c</sup>, Victoria FLOOD<sup>e</sup>, Bruce NEAL  
28 <sup>a,b</sup>.

30  
31 Affiliations: <sup>a</sup>The George Institute for Global Health, Sydney, Australia, <sup>b</sup>The University of  
32 Sydney, Sydney, Australia, <sup>c</sup>Deakin University Melbourne, Australia, <sup>d</sup>New South Wales  
33 Health, Sydney, Australia, <sup>e</sup>The University of Wollongong, Wollongong, Australia.  
34  
35  
36  
37  
38

39 TABLES: 3

40  
41 FIGURES: 1

42  
43 SUPPLEMENTARY: 0

44  
45 WORD COUNT: 2907

46  
47  
48 KEY WORDS: Salt, sodium, 24-hour urine, cardiovascular disease prevention  
49  
50  
51  
52  
53  
54  
55  
56  
57  
58  
59  
60

### *Article Focus*

The Global Monitoring Framework for the Prevention and Control of NCDs has set a salt reduction target of 30% by 2025. The assessment of population salt intake underpins the implementation of salt reduction policies and evaluates progress. The gold standard method for assessing population salt intake is the collection of a 24-hour urine specimen. However, because of the high burden, participation rates are generally low and the cost is often high. Hence there is great interest in alternative, yet robust and affordable methods to assess salt intake.

### *Key Messages*

The observation that an opportunistically recruited volunteer population sample appears to provide a reasonable estimate of salt intake is important because this could substantially reduce the cost of future monitoring efforts. If this finding was repeated in other settings this would have global implications, as the reporting of salt intake in 2015, 2020 and 2025 is encouraged as part of the Global Monitoring Framework for the Prevention and Control of NCDs.

### *Strengths and Limitations*

The 'Gold Standard' 24-hour urine method was used to estimate salt intake. The response rate for the random sample was low and the study location was a single town but the response rate and estimated level of salt excretion is not substantively different from that reported in a number of diverse population groups throughout the country.

1  
2  
3  
4  
5  
6  
7  
8  
9  
10  
11  
12  
13  
14  
15  
16  
17  
18  
19  
20  
21  
22  
23  
24  
25  
26  
27  
28  
29  
30  
31  
32  
33  
34  
35  
36  
37  
38  
39  
40  
41  
42  
43  
44  
45  
46  
47  
48  
49  
50  
51  
52  
53  
54  
55  
56  
57  
58  
59  
60

For peer review only

## Abstract

**Introduction:** The gold standard method for measuring population salt intake is based on a 24-hour urine collection. However, because participant burden is high, response rates are typically low with less than one in four agreeing to provide specimens. At this low level of response it is possible that simply asking for volunteers would produce equally valid results.

**Method:** We randomly selected 2152 adults from Lithgow, New South Wales and obtained usable 24-hour urine samples from 306 (response rate 16%). Specimens were also collected from a further 113 volunteers. Estimated salt consumption and the costs for each strategy were compared.

**Results:** The characteristics of the 'random' and 'volunteer' samples were moderately different in mean age 58 (standard deviation 14.6) vs. 49(17.7) years respectively;  $p<0.001$ ) as well as self-reported alcohol use, tobacco use, history of hypertension and prescription drug use (all  $p<0.04$ ). Overall crude mean 24-hour urinary salt excretion was 8.9(3.6)(g/d) in the random sample vs. 8.5(3.3)g/d for the volunteers ( $p=0.42$ ). Corresponding age- and sex-adjusted estimates were 9.2(3.3)g/d and 8.8(3.4)g/d ( $p=0.29$ ). Estimates for men 10.3(3.8) vs. 9.6(3.3)g/d;  $p=0.26$ ) and women 7.6(3.0) vs. 7.9(3.2)g/d;  $p=0.43$ ) were also similar for the two samples, as was salt excretion across age groups ( $p=0.72$ ). The cost of obtaining each 24-hour urine sample was two times greater for the random compared to volunteer samples (A\$62 vs. A\$31).

**Conclusion:** The estimated salt consumption derived from the two samples were comparable and were not substantively different to estimates obtained from other surveys.

1  
2  
3  
4  
5  
6  
7  
8  
9  
10  
11  
12  
13  
14  
15  
16  
17  
18  
19  
20  
21  
22  
23  
24  
25  
26  
27  
28  
29  
30  
31  
32  
33  
34  
35  
36  
37  
38  
39  
40  
41  
42  
43  
44  
45  
46  
47  
48  
49  
50  
51  
52  
53  
54  
55  
56  
57  
58  
59  
60

In countries where salt is pervasive and cannot easily be avoided, estimates of consumption obtained from volunteer samples may be valid and less costly.

For peer review only

## Background

Non-communicable diseases (NCDs) are the leading cause of death accounting for an estimated 35 million (66%) of the 53 million deaths at all ages that occurred in 2010.[1] Raised blood pressure is the leading risk factor for global disease burden, and is estimated to cause 9·4 million deaths every year—more than half of the estimated 17 million deaths a year caused by cardiovascular disease.[2] Much evidence shows that a reduction in salt intake lowers blood pressure and there is a high likelihood that this would reduce the risk of cardiovascular disease.[3] While there is not a current definitive estimate of population dietary salt intake in Australia, it is widely accepted that average consumption is between 7 and 12g/d[4] far above the suggested dietary target for Australians of 4g/d.[5]

The reduction of salt intake and salt content of food has been strongly recommended as a cost effective action that should be undertaken immediately, with expected accelerated results in terms of lives saved, cases of disease prevented and costs avoided.[6] This position has since been historically endorsed by the 2011 Political Declaration of the United Nations High Level Meeting on NCDs[7] which led to the development and adoption of the Global Monitoring Framework and Voluntary Global Targets for the Prevention and Control of NCDs in which salt reduction is a core target.[8]

Measurement of population salt consumption is fundamental for planning and monitoring salt reduction policies and the gold standard method is based upon a 24-hour urine collection from a random community sample. Surveys of this type are, however, complex and expensive and because participant burden is high, randomly selected community

1  
2  
3  
4 samples typically have low response rates.[9-11] This has been noted as a significant  
5  
6 concern at recent WHO NCD surveillance, monitoring and evaluation consultation  
7  
8 meetings in which several member states have expressed doubts about the feasibility of  
9  
10 using this method.[12] The potential adverse impact that a low response rate might have on  
11  
12 the conclusions drawn was highlighted and the need for further research into practicable  
13  
14 methods for defining and monitoring population salt consumption was underlined.[12]  
15  
16  
17  
18  
19  
20

21 The objective of the present study was to estimate sodium excretion using assays of 24-  
22  
23 hour urine samples collected from a regional Australian population. A key question about  
24  
25 practicality was addressed by using both a standard random sampling approach to make the  
26  
27 estimate while simultaneously recruiting an opportunistic (volunteer) sample to make an  
28  
29 alternate estimate. The study also examined the costs associated with each strategy.  
30  
31  
32  
33

## 34 **Methods**

35  
36 The data derived from a random sample and a convenience sample (volunteers) done  
37  
38 concurrently in Lithgow, New South Wales, Australia between March and June 2011.  
39  
40 Permission to undertake the study was obtained from the Lithgow City Council and the  
41  
42 project was approved by the University of Sydney Human Research Ethics Committee.  
43  
44  
45  
46  
47  
48

## 49 **Inclusion and exclusion criteria**

50  
51 Consenting individuals aged 20 years or above who were resident in Lithgow and listed on  
52  
53 the 2009 Federal electoral roll were eligible for inclusion. There was no exclusion based on  
54  
55  
56  
57  
58  
59  
60



1  
2  
3  
4 inter-current illness, use of medications or any other aspect of demography or personal  
5  
6 history.  
7  
8  
9

### 10 11 **Selection and recruitment process**

12  
13  
14 *Random sampling* was done by selecting individuals at random from the electoral roll. The  
15  
16 electoral roll provided the name and address of each potential participant with electronic  
17  
18 databases searched to identify corresponding telephone numbers. Based on the assumption  
19  
20 that approximately 25% of invited individuals would participate, 2152 individuals were  
21  
22 selected to reach the desired sample size.  
23  
24

25  
26  
27  
28 Potential participants were first mailed invitations to take part in the survey, with an  
29  
30 explanation of the purpose of the study, a participant information sheet and a consent form  
31  
32 provided. These individuals were then contacted by telephone to determine their  
33  
34 willingness to participate and to schedule an interview time. Where a telephone number  
35  
36 could not be obtained, the home address was visited by a member of the research team and  
37  
38 willingness to participate was discussed face-to-face.  
39  
40  
41  
42

43  
44  
45 *Volunteer sampling* was done by offering participation in the study to individuals at two  
46  
47 local shopping centres over several weeks. An information booth was established where  
48  
49 those interested could seek further information about participation and arrange a visit by a  
50  
51 member of the study team. Recruitment was completed at the time of the inquiry made to  
52  
53 the study staff member manning the information booth.  
54  
55  
56

### Data collection process

Data collection for randomly selected individuals and the volunteer sample was identical and commenced with a visit to the study participant by a trained research assistant. Once consent was obtained the three components of data collection, comprising a questionnaire, a physical examination and a 24-hour urine collection were initiated. The questionnaire and physical examination were completed at the time of the visit and the urine collection was scheduled to be done within the following three days.

The *questionnaire* was fully structured and administered by research assistants, with all responses based on self-report. The questionnaire recorded information on socio-demographic variables, vascular disease history and current drug treatments. Participants were asked to provide the names of regular medications but if that was not known the purpose of the medication was recorded (for example, anti-hypertensive medication).

*The physical examination* comprised measurement of body weight (using calibrated Tania HD-357 portable electronic scales (USA) and height (using a calibrated portable stadiometer Wedderburn WS-HRP model (Australia)) to the nearest 0.1kg and 0.1cm respectively, with body mass index ( $\text{kg}/\text{height}(\text{m}^2)$ ) then calculated. Blood pressure was measured using a manual inflation blood pressure monitor (A&D UA-&704) in triplicate, according to the American Heart Association protocol.[13]

1  
2  
3  
4 *A single 24-hour urine collection* was obtained with the first voided urine upon waking on  
5  
6 the day of collection being discarded and participants then collecting all voided urine up to  
7  
8 and including the first void the following morning. The time at the beginning and the end  
9  
10 of urine collection were recorded. The urine volume was noted and the urinary sodium  
11  
12 concentration in an aliquot was measured by ion-selective electrode with the buffered  
13  
14 kinetic Jaffe reaction without deproteinisation used for assay of urine creatinine (Cobas  
15  
16 Integra 400). Suspected inaccurate urine collections (i.e. urinary creatinine < 4.0 mmol/day  
17  
18 for women, or < 6.0mmol/day for men, or a 24-hour urine collection of < 500ml for either  
19  
20 sex) and extreme outliers for urinary creatinine (i.e. > 3 standard deviations from the mean)  
21  
22 were excluded. The rates of exclusion were similar for the random and volunteer samples.  
23  
24 For each individual, the 24-hour sodium excretion value (mmol/day) was calculated as the  
25  
26 concentration of sodium in the urine (mmol/L) multiplied by the urinary volume (L/day).  
27  
28 The conversion from sodium (Na) to salt (NaCl) was made by multiplying the sodium  
29  
30 value by 2.542 (NaCl(g)=Na(g) x 2.542).  
31  
32  
33  
34  
35  
36  
37  
38  
39

#### 40 **Cost data**

41  
42 The pre-interview costs involved staff time in selecting and attempting to reach subjects  
43  
44 including accessing the electoral roll, sending participant invitations, follow-up phone calls  
45  
46 and door-knocking to schedule interviews with those randomly selected, as well as setting  
47  
48 up and manning an information booth to engage the volunteer sample were documented.  
49  
50 The post-interview costs comprised primarily of pathology expenses and were the same for  
51  
52 each sample.  
53  
54  
55  
56  
57  
58  
59  
60

## Statistical analyses

The baseline characteristics of the sample selected at random and the volunteer sample were summarized and compared using t-tests and Chi-square tests as were their average urinary sodium values. In addition to the crude estimates described above, weighted estimates of overall population mean sodium excretion were also made in an effort to account for the non-random sampling of individuals. This was done for both the randomly selected group (to adjust for the poor response rate) and for the volunteer group (to adjust for their non-representative age and sex structure) by calculating age- and sex-specific estimates of salt excretion for 20 year age bands (20-39, 40-59, and 60 plus) for men and women and then weighting these by the age and sex structure of the population to obtain an overall estimate for the community. Regression models were fitted to explore the association between baseline participant characteristics and a range of covariates in the combined (random plus volunteer) sample. Throughout, a p-value of 0.05 or less was taken to indicate a finding unlikely to have arisen solely by chance. Statistical analyses were conducted using SPSS for Windows (Version 21, SPSS Inc, Chicago, IL) and STATA for windows (StataCorp. 2009 *Strata Statistical Software: Release 11*. College Station, TX: StataCorp LP).

## Results

Of 2,152 individuals selected by random sampling of the electoral roll, 853 (40%) were uncontactable after multiple attempts, 126 (5.8%) were ineligible because they had moved out of the study area, 5 (0.2%) had died and 843 (39%) declined to participate. The remaining 329 individuals comprise the 'random' sample with a response rate of 16%. The volunteer

1  
2  
3  
4 sample comprised 120 individuals recruited consecutively at a shopping mall over a seven  
5  
6 day period. The characteristics of the random and volunteer samples were moderately  
7  
8 different in a number of regards, including age, proportion tobacco use, alcohol use, self-  
9  
10 reported hypertension and use of any prescription medication (Table 1).  
11  
12

### 13 14 15 16 **Crude and weighted 24-hour urinary salt excretion in random and volunteer samples**

17  
18 For the analysis there were 306 individuals in the random sample and 113 in the volunteer  
19  
20 group with 20 excluded because of suspected incomplete urine collections and 10 for other  
21  
22 reasons (Figure 1). The crude mean 24-hour urinary salt excretion was 8.9 (standard  
23  
24 deviation 3.6) g/d in the random sample and 8.5 (3.3) g/d in the volunteer group (p=0.42).  
25  
26 The corresponding weighted estimates for the Lithgow population were 9.2 (3.9) g/d and  
27  
28 8.8 (3.4) g/d respectively (p=0.29).  
29  
30  
31  
32  
33  
34

35 The proportion of randomly sampled individuals exceeding the 6 g/d recommended  
36  
37 Maximum Level for Australians was 79%, the proportion exceeding the Australian  
38  
39 Suggested Dietary Target of 4 g/d was 94% and the proportion exceeding the WHO  
40  
41 Maximum Recommended Level of 5 g/d was 87%. The corresponding proportions for the  
42  
43 volunteer group were 75%, 93% and 84%. Population-weighted estimates of these  
44  
45 proportions were not substantively different.  
46  
47  
48  
49  
50

### 51 52 **24-hour urinary salt excretion in participant subgroups**

1  
2  
3  
4 Urinary sodium excretion in both population samples was significantly higher in men  
5 compared to women 10.3 (3.8) g/d vs. 7.6 (3.0) g/d;  $p < 0.001$  for random sample and 9.6  
6 (3.3) g/d vs. 7.9 (3.2) g/d;  $p = 0.006$  for the volunteer sample (Table 2) and this was also true  
7 for every age group. There was an inverse association between daily salt excretion and age  
8 (Table 2) such that for every decade increase in age there was 0.3g/d less excretion of salt  
9 ( $p = 0.007$ ). The association between salt excretion and BMI was positive with every unit  
10 rise in BMI associated with a 0.16g/d greater excretion of salt ( $p < 0.001$ ). Similar patterns  
11 were observed in both the random and volunteer population samples. There were no other  
12 significant associations observed between salt excretion levels and recorded participant  
13 characteristics including education, health status, tobacco use, alcohol use, blood pressure,  
14 disease history or prescription drug use (all  $p > 0.05$ ).

### 32 **Costs associated with random and volunteer survey methods**

33  
34  
35 The two main costs associated with doing the study were staff salaries and pathology  
36 expenses. Due primarily to the increased staff time required for the selection and  
37 interaction with the randomly selected individuals the estimated average cost associated  
38 with obtaining a valid 24-hour urine sample was greater for each participant in the random  
39 sample (about AUD\$ 62) compared to each participant in the volunteer sample (about  
40 AUD\$ 31).

### 49 **Discussion**

50  
51  
52 In this population salt intake greatly exceeds the recommended levels, reaffirming the  
53 urgent need for concerted action to address salt consumption in Australia. Mean salt  
54  
55

1  
2  
3  
4 excretion levels were some 50% higher than maximum recommended levels[5, 14] and  
5  
6 only about one in every twenty individuals was found to be consuming the level of salt  
7  
8 recommended for good health. Even these data are likely to be an under-estimate of the  
9  
10 problem because the approximate 10% of salt excreted by the gastro-intestinal system and  
11  
12 the skin will have gone unrecorded.[15] The level of excess salt consumption indicated by  
13  
14 this survey would be anticipated to cause substantial disease burden in Australia leading  
15  
16 both to large numbers of lives lost prematurely and to many individuals suffering  
17  
18 significant disability.[16] With centrally implemented salt reduction programs projected to  
19  
20 deliver large population health gains at very low cost [17-19], the implementation of an  
21  
22 effective salt reduction program should be a priority for the government of Australia.[20,  
23  
24  
25  
26  
27  
28 21]

29  
30  
31  
32  
33 The observation that the volunteer sample produced similar findings to the random sample  
34  
35 is important because it was much easier and less costly to collect data from the volunteer  
36  
37 sample than from the random sample. There are several reasons why a volunteer sample  
38  
39 might provide a similar result to a random sample when estimating population salt  
40  
41 consumption from 24-hour urine samples. First, the response rate in a random sample from  
42  
43 whom a 24-hour urine sample is sought is typically very low, averaging 20% (range 9.7%  
44  
45 to 26.8%) in a series of recently reported studies.[9-11, 20] In this situation the random  
46  
47 sample effectively becomes a volunteer sample and any biases consequent upon using a  
48  
49 volunteer sample might also be apparent in the 'random' sample. That said, there were  
50  
51 many differences between the characteristics of the random and volunteer samples included  
52  
53  
54  
55  
56  
57  
58  
59  
60

1  
2  
3  
4 in this study but these did not translate into detectable differences in the observed sodium  
5 excretion. Another possible explanation therefore is the ubiquitous nature of salt in the  
6 food supply[22] and the rather limited capacity of even motivated individuals to  
7 meaningfully modify their salt consumption,[23] thereby minimizing the impact of any  
8 “healthy volunteer” effect.[24]  
9  
10  
11  
12  
13  
14  
15  
16  
17  
18

19 In some countries it may be possible to achieve better response rates[25, 26] and in others it  
20 may be that specific dietary practices or other cultural factors will mean that a volunteer  
21 sample will not give a good measure of true population salt intake. If, however, the  
22 findings reported here are observed elsewhere, volunteer sampling might provide a low-  
23 cost alternate to traditional random sampling techniques. At the very least it may be  
24 possible to use a volunteer sample to demonstrate the need for action - most countries in the  
25 world are likely to have salt consumption levels far above the WHO consumption target of  
26 <5g/d, and the likelihood that the selection of a volunteer sample will lead to an under-  
27 recording of salt consumption of a very large magnitude is probably fairly small.  
28  
29  
30  
31  
32  
33  
34  
35  
36  
37  
38  
39  
40  
41

42 In addition to the baseline assessment required to justify the commencement of a salt  
43 reduction strategy, ongoing monitoring of salt consumption is required to objectively  
44 determine program efficacy. If the resources required to conduct high quality surveys of a  
45 random population sample can be acquired then this remains the optimal approach both to  
46 baseline evaluation and monitoring of progress. If not, then repeat surveys of volunteers  
47 are likely to be of value if the methods used for participant selection are identical on each  
48  
49  
50  
51  
52  
53  
54  
55  
56  
57  
58  
59  
60



1  
2  
3  
4 occasion – if the biases are the same on each measurement occasion then any real rise or  
5  
6 fall in salt consumption should be clearly apparent.  
7  
8  
9

10  
11 The cost estimates made for this study showed that recruiting the volunteer sample was a  
12 significantly less expensive exercise than recruiting the random population sample. The  
13 primary reason for this was the much reduced fieldwork time required for the per capita  
14 recruitment of the volunteer sample. Pathology and other recorded costs were otherwise  
15 approximately the same. Expenses that were not specifically determined were the costs of  
16 computer hardware, computer software, the training of the field staff, and the time required  
17 for supervision by the project manager. The last two of these are also likely to have been  
18 lower for the volunteer sample due to the simplified and more rapid recruitment process  
19 and, as a consequence, the reported difference between costs is likely to have been under-,  
20 rather than over-estimated.  
21  
22  
23  
24  
25  
26  
27  
28  
29  
30  
31  
32  
33  
34  
35  
36  
37

### 38 **Strengths and limitations**

39 The ‘Gold Standard’ 24-hour urine method was used to estimate salt intake with standard  
40 checks for completeness of the specimens based upon urine volume and urine creatinine  
41 excretion. The response rate for the random sample was low but comparable to other  
42 studies done in similar settings over recent years.[9-11] The sample size was relatively  
43 small and results for subgroups are somewhat imprecise as a consequence. It is possible,  
44 for this same reason, that the study may have failed to identify small, but real, differences  
45 between the salt excretion levels determined by the two different population sampling  
46  
47  
48  
49  
50  
51  
52  
53  
54  
55  
56  
57  
58  
59  
60

1  
2  
3  
4 methods. The location of the study in a single town in a regional area of New South Wales  
5  
6 compromises the direct generalizability of the study findings to Australia as a whole,  
7  
8 although the estimated level of salt excretion is not substantively different from that  
9  
10 reported in a number of diverse population groups throughout the country.[27-39]  
11  
12  
13

## 14 15 16 **Conclusion** 17

18  
19 These data affirm that current efforts to reduce salt intake in Australia are failing, with a  
20  
21 large majority of the population studied consuming more than the recommended Australian  
22  
23 Upper Limit of 6g/d and almost everyone eating more than the Suggested Dietary Target of  
24  
25 4g/day. The observation that an opportunistically recruited volunteer population sample  
26  
27 appears to provide a reasonable estimate of salt intake is important because this could  
28  
29 substantially reduce the cost of future monitoring efforts. If this finding was repeated in  
30  
31 other settings this would have global implications because sodium reduction has been  
32  
33 proposed to all member states by the WHO. Most countries, however, have very limited  
34  
35 resources available and any reduction in program cost that can be achieved without  
36  
37 seriously adversely affecting program quality will be an important step forward. With  
38  
39 population-based salt reduction strategies already shown to be cost effective or cost-saving  
40  
41 in most settings, these new data further support the feasibility of widespread rollout of  
42  
43 national salt reduction efforts around the world.  
44  
45  
46  
47  
48  
49  
50  
51  
52  
53  
54  
55  
56  
57  
58  
59  
60

**TABLE 1. CHARACTERISTICS OF RANDOM AND VOLUNTEER SAMPLES**

|                                                             | Random sample<br>(n=306) | Volunteer sample<br>(n=113) | p-value |
|-------------------------------------------------------------|--------------------------|-----------------------------|---------|
| Female (%)                                                  | 52.9                     | 61.9                        | 0.10    |
| Age, years (mean)                                           | 57.6                     | 49.3                        | <0.001  |
| Height, cm (mean)                                           | 167.5                    | 167.6                       | 0.85    |
| Weight, kg (mean)                                           | 81.8                     | 83.9                        | 0.30    |
| BMI, kg/m <sup>2</sup> (mean)                               | 29.1                     | 29.8                        | 0.27    |
| Systolic bp, mmHg (mean)                                    | 126.7                    | 123.7                       | 0.16    |
| Diastolic bp, mmHg (mean)                                   | 78.7                     | 78.9                        | 0.88    |
| Education                                                   |                          |                             | 0.22    |
| -Secondary (%)                                              | 63.7                     | 55.8                        |         |
| -Tertiary (%)                                               | 25.5                     | 32.7                        |         |
| -Postgraduate (%)                                           | 10.8                     | 11.5                        |         |
| Health Status                                               |                          |                             | 0.21    |
| -Very good (%)                                              | 50.3                     | 48.7                        |         |
| -Good (%)                                                   | 29.4                     | 23.9                        |         |
| -Fair (%)                                                   | 20.2                     | 27.4                        |         |
| Current smoker (> 1 / day) (%)                              | 8.2                      | 22.1                        | <0.001  |
| Ever smoked (> 1 / day) (%)                                 | 41.2                     | 53.1                        | 0.03    |
| Alcoholic consumption (time since last consumption)         |                          |                             | 0.04    |
| One week or less (%)                                        | 62.1                     | 42.5                        |         |
| > one week < 12months (%)                                   | 19.9                     | 34.5                        |         |
| 12 months or more (%)                                       | 11.1                     | 10.6                        |         |
| Never (%)                                                   | 6.9                      | 12.4                        |         |
| Have you ever been told by a doctor or nurse that you have: |                          |                             |         |
| -high blood pressure (%)                                    | 44.1                     | 30.1                        | 0.03    |
| -low blood pressure (%)                                     | 15.4                     | 14.2                        | 0.76    |
| -high cholesterol (%)                                       | 37.3                     | 30.0                        | 0.16    |
| -heart attack (%)                                           | 8.2                      | 3.5                         | 0.10    |
| -stroke (%)                                                 | 3.9                      | 1.8                         | 0.37    |
| -angina (%)                                                 | 6.9                      | 4.4                         | 0.36    |
| -diabetes (%)                                               | 11.1                     | 7.1                         | 0.26    |
| Prescription Medication Use*                                |                          |                             |         |
| Antihypertensive (%)                                        | 15.4                     | 15.0                        | 0.54    |

1  
2  
3  
4  
5  
6  
7  
8  
9  
10  
11  
12  
13  
14  
15  
16  
17  
18  
19  
20  
21  
22  
23  
24  
25  
26  
27  
28  
29  
30  
31  
32  
33  
34  
35  
36  
37  
38  
39  
40  
41  
42  
43  
44  
45  
46  
47  
48  
49  
50  
51  
52  
53  
54  
55  
56  
57  
58  
59  
60

|                                 |      |      |      |
|---------------------------------|------|------|------|
| Lipid lowering (%)              | 11.1 | 7.1  | 0.62 |
| Aspirin (%)                     | 8.8  | 2.7  | 0.06 |
| Glucose lowering (%)            | 22.5 | 7.1  | 0.17 |
| Any prescription medication (%) | 73.9 | 59.2 | 0.02 |

\*Participants could be taking more than one prescribed medication

For peer review only

TABLE 2. URINARY SALT EXCRETION (GRAMS/DAY)

|                                                      | Random sample<br>(n=306) |              | Volunteer sample<br>(n=113) |              | P value     |
|------------------------------------------------------|--------------------------|--------------|-----------------------------|--------------|-------------|
|                                                      | Mean                     | (SD)         | Mean                        | (SD)         |             |
| <b>Overall crude</b>                                 | <b>8.9</b>               | <b>(3.6)</b> | <b>8.5</b>                  | <b>(3.3)</b> | <b>0.42</b> |
| <b>Overall weighted*</b>                             | <b>9.2</b>               | <b>(3.9)</b> | <b>8.8</b>                  | <b>(3.4)</b> | <b>0.29</b> |
| Female                                               |                          |              |                             |              | 0.27        |
| 20-39                                                | 8.7                      | (4)          | 7.9                         | (2.9)        |             |
| 40-59                                                | 8                        | (3.1)        | 7.8                         | (3.8)        |             |
| 60+                                                  | 6.8                      | (2.4)        | 7.9                         | (2.6)        |             |
| All female                                           | 7.6                      | (3)          | 7.9                         | (3.2)        |             |
| Male                                                 |                          |              |                             |              | 0.40        |
| 20-39                                                | 10.8                     | (4.7)        | 10.5                        | (3.9)        |             |
| 40-59                                                | 11.1                     | (4.2)        | 9.8                         | (3.0)        |             |
| 60+                                                  | 9.7                      | (3.1)        | 8.6                         | (3.0)        |             |
| All male                                             | 10.3                     | (3.8)        | 9.6                         | (3.3)        |             |
| Education                                            |                          |              |                             |              | 0.25        |
| Secondary                                            | 9.1                      | (3.7)        | 8.9                         | (3.4)        |             |
| Tertiary                                             | 8.3                      | (3.0)        | 8.5                         | (3.3)        |             |
| Post graduate                                        | 8.4                      | (3.6)        | 8                           | (3.3)        |             |
| Health Status                                        |                          |              |                             |              | 0.89        |
| Very Good                                            | 8.7                      | (3.8)        | 8                           | (2.9)        |             |
| Good                                                 | 8.8                      | (3.5)        | 9.3                         | (3.7)        |             |
| Fair                                                 | 8.7                      | (2.8)        | 8.3                         | (2.6)        |             |
| Current Smoker                                       | 9                        | (3.8)        | 8.8                         | (3.4)        | 0.82        |
| Ever Smoked                                          | 8.8                      | (3.6)        | 9                           | (3.6)        | 0.74        |
| Alcohol Consumption<br>(time since last consumption) |                          |              |                             |              | 0.45        |
| One week or less                                     | 8.8                      | (3.8)        | 8.7                         | (3.8)        |             |
| > one week < 12months                                | 8.6                      | (3.2)        | 8.7                         | (2.9)        |             |
| 12 months or more                                    | 9.3                      | (3.8)        | 7.8                         | (2.8)        |             |
| Never                                                | 9.1                      | (3.2)        | 8.1                         | (3.6)        |             |

\*Adjusted for response rate (random sample) and non-random selection (volunteer sample) by weighting age-and sex-specific estimates to the age and sex structure of the Lithgow population

**TABLE 3. COST OF RANDOM COMPARED TO VOLUNTEER SAMPLING (AUD)**

|                                     | <b>Random<br/>Sample(n=306)</b> | <b>Volunteer<br/>Sample(n=113)</b> |
|-------------------------------------|---------------------------------|------------------------------------|
| <b>Pre-interview costs</b>          |                                 |                                    |
| <b>Sampling from electoral roll</b> | \$2,152                         | 0                                  |
| <b>Scheduling interviews</b>        | \$8,704                         | \$1,088                            |
| <b>Post-interview costs</b>         |                                 |                                    |
| <b>Pathology costs</b>              | \$4,211                         | \$1,584                            |
| <b>Other costs</b>                  |                                 |                                    |
| <b>Postage</b>                      | \$2,169                         | 0                                  |
| <b>Telephone</b>                    | \$1,870                         | \$818                              |
| <b>Shopping centre stand fee</b>    |                                 | \$10                               |
| <b>TOTAL</b>                        | <b>\$19,106</b>                 | <b>\$3,500</b>                     |
| <b>COST PER PARTICIPANT*</b>        | <b>\$62.44</b>                  | <b>\$30.96</b>                     |

\*Cost per participant calculated by dividing total cost by the number of valid participants in each sample.

**FIGURE 1. RECRUITMENT OF POPULATION SAMPLE**

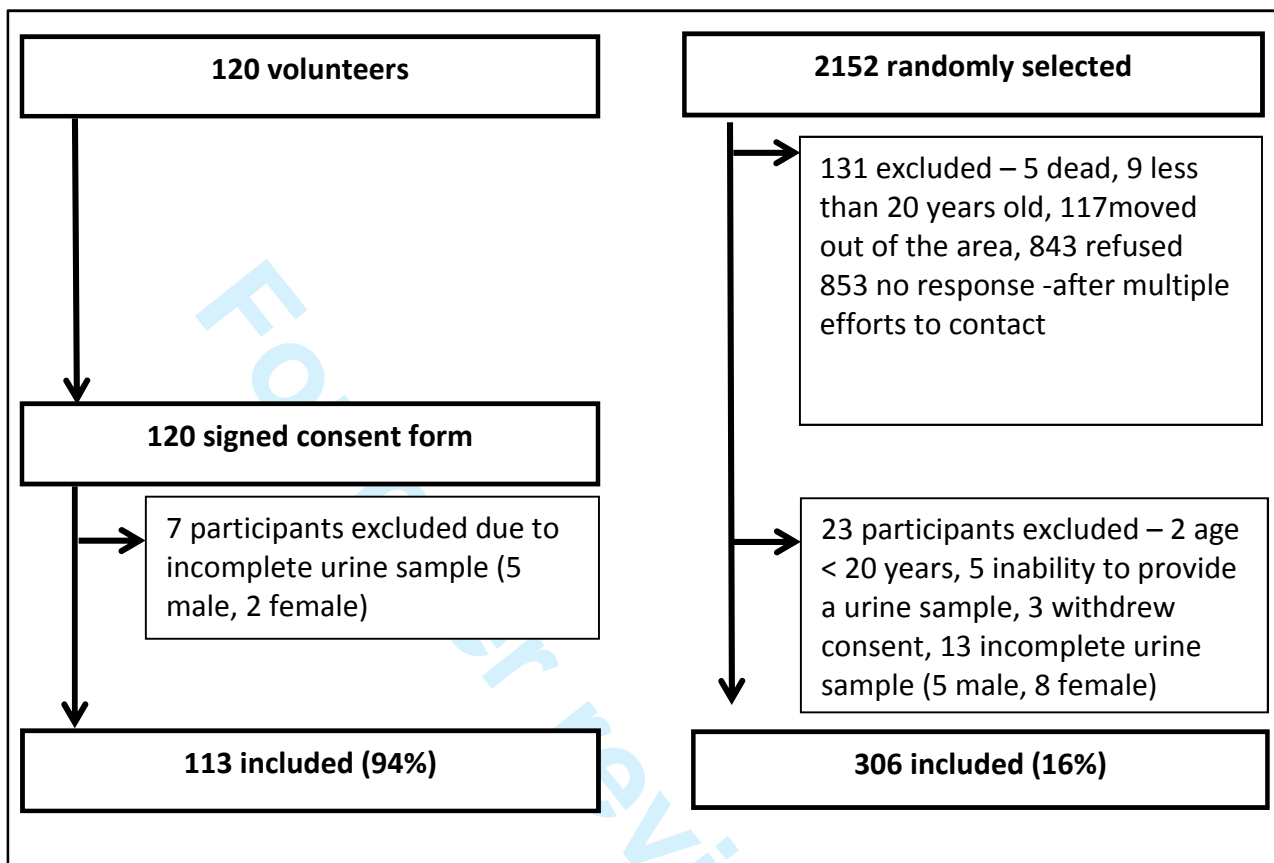

## Acknowledgments

The authors thank Lithgow City Council, the Nepean Blue Mountains Local Area Health Network for their support and most importantly all of the participants for their support and interest in the study.

## Sources of support

This work was supported by a National Health and Medical Research Council (NHMRC) of Australia partnership project (Neal #13372) which includes The George Institute for Global Health in partnership with the Australian Division of World Action on Salt and Health; the Australian Food and Grocery Council; the New South Wales Food Authority; and New South Wales Health. Bruce Neal was supported by an Australian Research Council Future Fellowship, Mark Woodward by a NHMRC Fellowship and Jacqui Webster by a National Heart Foundation and Stroke Foundation postdoctoral research fellowship.

## Conflicts of interest

J.W. is the co-ordinator, and B.N. is the Chairman of the Australian Division of World Action on Salt and Health.



## References

1. Lozano, R., et al., *Global and regional mortality from 235 causes of death for 20 age groups in 1990 and 2010: a systematic analysis for the Global Burden of Disease Study 2010*. Lancet, 2012. **380**(9859): p. 2095-128.
2. Lim, S.S., et al., *A comparative risk assessment of burden of disease and injury attributable to 67 risk factors and risk factor clusters in 21 regions, 1990-2010: a systematic analysis for the Global Burden of Disease Study 2010*. Lancet, 2012. **380**(9859): p. 2224-60.
3. He, F.J., N.R. Campbell, and G.A. MacGregor, *Reducing salt intake to prevent hypertension and cardiovascular disease*. Rev Panam Salud Publica, 2012. **32**(4): p. 293-300.
4. Keogh, J.B. and P.M. Clifton, *Salt intake and health in the Australian population*. Med J Aust, 2008. **189**(9): p. 526.
5. National Health and Medical Research Council, *Nutrient Reference Values for Australia and New Zealand*, 2006, Department of Health and Ageing.
6. The World Health Organisation, *2008-2013 Action Plan for the Global Strategy for the Prevention and Control of Noncommunicable Diseases*, 2008.
7. United Nations. *2011 High Level Meeting on Prevention and Control of Non-communicable Diseases*. 2011 [cited 2012 12/12/2012]; Available from: <http://www.un.org/en/ga/ncdmeeting2011/>.
8. The World Health Organization, *Formal meeting of Member States to conclude the work on the comprehensive global monitoring framework, including indicators, and a set of voluntary global targets for the prevention and control of noncommunicable diseases Geneva, 5–7 November 2012*, 2012: Geneva.

- 1  
2  
3 9. Ribic, C.H., et al., *Salt intake of the Slovene population assessed by 24 h urinary sodium*  
4  
5 *excretion*. Public Health Nutr, 2010. **13**(11): p. 1803-9.  
6  
7
- 8 10. Chappuis, A., et al., *Swiss survey on salt intake: main results*. 2011.  
9
- 10 11. Ortega, R.M., et al., *Estimation of salt intake by 24 h urinary sodium excretion in a*  
11  
12 *representative sample of Spanish adults*. Br J Nutr, 2011. **105**(5): p. 787-94.  
13  
14
- 15 12. The World Health Organisation, *European Regional Technical Consultation on*  
16  
17 *Noncommunicable Disease Surveillance, Monitoring and Evaluation*. 2012.  
18  
19
- 20 13. Perloff, D., et al., *Human blood pressure determination by sphygmomanometry*. Circulation,  
21  
22 1993. **88**(5 Pt 1): p. 2460-70.  
23  
24
- 25 14. The World Health Organization, *Reducing Salt Intake in Populations*, in *Report of a WHO*  
26  
27 *Forum and Technical Meeting 2007*, World Health Organisation: Geneva.  
28
- 29 15. Kirkendall, A.M., et al., *The effect of dietary sodium chloride on blood pressure, body*  
30  
31 *fluids, electrolytes, renal function, and serum lipids of normotensive man*. J Lab Clin Med,  
32  
33 1976. **87**(3): p. 411-34.  
34  
35
- 36 16. Cobiac, L.J., et al., *Which interventions offer best value for money in primary prevention of*  
37  
38 *cardiovascular disease?* PLoS One, 2012. **7**(7): p. e41842.  
39  
40
- 41 17. Beaglehole, R., et al., *UN High-Level Meeting on Non-Communicable Diseases: addressing*  
42  
43 *four questions*. Lancet, 2011. **378**(9789): p. 449-55.  
44  
45
- 46 18. National Heart Foundation of Australia, *Summary of evidence statement on the relationships*  
47  
48 *between dietary electrolytes and cardiovascular disease*.  
49  
50 [http://www.heartfoundation.org.au/SiteCollectionDocuments/Dietary-Electrolytes-CVD-](http://www.heartfoundation.org.au/SiteCollectionDocuments/Dietary-Electrolytes-CVD-Summary-Evidence.pdf)  
51  
52 [Summary-Evidence.pdf](http://www.heartfoundation.org.au/SiteCollectionDocuments/Dietary-Electrolytes-CVD-Summary-Evidence.pdf), 2006.  
53  
54  
55  
56  
57  
58  
59  
60

19. Cook, N.R., et al., *Long term effects of dietary sodium reduction on cardiovascular disease outcomes: observational follow-up of the trials of hypertension prevention (TOHP)*. BMJ, 2007. **334**(7599): p. 885-8.
20. Brown, I.J., et al., *Salt intakes around the world: implications for public health*. Int J Epidemiol, 2009. **38**(3): p. 791-813.
21. Bibbins-Domingo, K., et al., *Projected Effect of Dietary Salt Reductions on Future Cardiovascular Disease*. N Engl J Med, 2010: p. NEJMoa0907355.
22. Webster, J.L., E.K. Dunford, and B.C. Neal, *A systematic survey of the sodium contents of processed foods*. Am J Clin Nutr, 2010. **91**(2): p. 413-20.
23. Kumanyika, S., *Behavioral aspects of intervention strategies to reduce dietary sodium*. Hypertension, 1991. **17**(1 Suppl): p. I190-5.
24. Lindsted, K.D., et al., *Healthy volunteer effect in a cohort study: temporal resolution in the Adventist Health Study*. J Clin Epidemiol, 1996. **49**(7): p. 783-90.
25. Tuomilehto, J., et al., *Community-based prevention of hypertension in North Karelia, Finland*. Ann Clin Res, 1984. **16 Suppl 43**: p. 18-27.
26. Staessen, J., et al., *Salt intake and blood pressure in the general population: a controlled intervention trial in two towns*. J Hypertens, 1988. **6**(12): p. 965-73.
27. Beard, T.C., et al., *The Hobart Salt Study 1995: few meet national sodium intake target*. Med J Aust, 1997. **166**(8): p. 404-7.
28. Jones, G., et al., *A population-based study of the relationship between salt intake, bone resorption and bone mass*. Eur J Clin Nutr, 1997. **51**(8): p. 561-5.
29. Bao, D.Q., et al., *Effects of dietary fish and weight reduction on ambulatory blood pressure in overweight hypertensives*. Hypertension, 1998. **32**(4): p. 710-7.

- 1  
2  
3  
4  
5  
6  
7  
8  
9  
10  
11  
12  
13  
14  
15  
16  
17  
18  
19  
20  
21  
22  
23  
24  
25  
26  
27  
28  
29  
30  
31  
32  
33  
34  
35  
36  
37  
38  
39  
40  
41  
42  
43  
44  
45  
46  
47  
48  
49  
50  
51  
52  
53  
54  
55  
56  
57  
58  
59  
60
30. Mori, Y., et al., *Effect of highly purified eicosapentaenoic acid ethyl ester on insulin resistance and hypertension in Dahl salt-sensitive rats*. *Metabolism*, 1999. **48**(9): p. 1089-95.
31. Cumming, R.G., P. Mitchell, and W. Smith, *Dietary sodium intake and cataract: the Blue Mountains Eye Study*. *Am J Epidemiol*, 2000. **151**(6): p. 624-6.
32. Nowson, C.A., T.O. Morgan, and C. Gibbons, *Decreasing dietary sodium while following a self-selected potassium-rich diet reduces blood pressure*. *J Nutr*, 2003. **133**(12): p. 4118-23.
33. Nowson, C.A., et al., *Blood pressure response to dietary modifications in free-living individuals*. *J Nutr*, 2004. **134**(9): p. 2322-9.
34. Ward, N.C., et al., *Oxidative stress in human hypertension: association with antihypertensive treatment, gender, nutrition, and lifestyle*. *Free Radic Biol Med*, 2004. **36**(2): p. 226-32.
35. Hodgson, J.M., et al., *Partial substitution of carbohydrate intake with protein intake from lean red meat lowers blood pressure in hypertensive persons*. *Am J Clin Nutr*, 2006. **83**(4): p. 780-7.
36. Margerison, C. and C. Nowson, *Dietary intake and 24-hour excretion of sodium and potassium*. *Asia Pac J Clin Nutr*, 2006. **15**: p. S37.
37. Julie Boorman, J.C., Dorothy Mackerras., *Salt Intake From Processed Food and Discretionary Use in Australia*. Food Standards Australia New Zealand, ACT Australia  
Available at: [http://www.foodstandards.gov.au/srcfiles/Salt\\_Intake\\_5.pdf](http://www.foodstandards.gov.au/srcfiles/Salt_Intake_5.pdf)

- 1  
2  
3  
4  
5  
6  
7  
8  
9  
10  
11  
12  
13  
14  
15  
16  
17  
18  
19  
20  
21  
22  
23  
24  
25  
26  
27  
28  
29  
30  
31  
32  
33  
34  
35  
36  
37  
38  
39  
40  
41  
42  
43  
44  
45  
46  
47  
48  
49  
50  
51  
52  
53  
54  
55  
56  
57  
58  
59  
60
38. Brinkworth, G.D., et al., *Reductions in blood pressure following energy restriction for weight loss do not rebound after re-establishment of energy balance in overweight and obese subjects*. Clin Exp Hypertens, 2008. **30**(5): p. 385-96.
39. Charlton, K., et al., *Urinary sodium excretion, dietary sources of sodium intake and knowledge and practices around salt use in a group of healthy Australian women*. Aust N Z J Public Health, 2010. **34**(4): p. 356-63.



**SALT INTAKE ASSESSED BY 24-HOUR URINARY SODIUM  
EXCRETION IN A RANDOM AND OPPORTUNISTIC SAMPLE IN  
AUSTRALIA**

|                                 |                                                                                                                                                                                                                                                                                                                                                                                                                                                                                                                                                                                                                                                                                                                                                                                                                                                                                             |
|---------------------------------|---------------------------------------------------------------------------------------------------------------------------------------------------------------------------------------------------------------------------------------------------------------------------------------------------------------------------------------------------------------------------------------------------------------------------------------------------------------------------------------------------------------------------------------------------------------------------------------------------------------------------------------------------------------------------------------------------------------------------------------------------------------------------------------------------------------------------------------------------------------------------------------------|
| Journal:                        | <i>BMJ Open</i>                                                                                                                                                                                                                                                                                                                                                                                                                                                                                                                                                                                                                                                                                                                                                                                                                                                                             |
| Manuscript ID:                  | bmjopen-2013-003720.R1                                                                                                                                                                                                                                                                                                                                                                                                                                                                                                                                                                                                                                                                                                                                                                                                                                                                      |
| Article Type:                   | Research                                                                                                                                                                                                                                                                                                                                                                                                                                                                                                                                                                                                                                                                                                                                                                                                                                                                                    |
| Date Submitted by the Author:   | 22-Oct-2013                                                                                                                                                                                                                                                                                                                                                                                                                                                                                                                                                                                                                                                                                                                                                                                                                                                                                 |
| Complete List of Authors:       | Land, Mary-Anne; The George Institute for Global Health, ; The University of Sydney,<br>Webster, Jacqui; The George Institute for Global Health, ; The University of Sydney,<br>Christoforou, Anthea; The George Institute for Global Health, ; The University of Sydney,<br>Praveen, D; The George Institute for Global Health, ; The University of Sydney,<br>Jeffery, Paul; Deakin University,<br>Chalmers, John; The George Institute for Global Health, ; The University of Sydney,<br>Smith, Wayne; New South Wales Health,<br>Woodward, Mark; The George Institute for Global Health, ; The University of Sydney,<br>Barzi, Federica; The George Institute for Global Health, ; The University of Sydney,<br>Nowson, Caryl; Deakin University,<br>Flood, Victoria; The University of Wollongong,<br>Neal, Bruce; The George Institute for Global Health, ; The University of Sydney, |
| <b>Primary Subject Heading</b>: | Public health                                                                                                                                                                                                                                                                                                                                                                                                                                                                                                                                                                                                                                                                                                                                                                                                                                                                               |
| Secondary Subject Heading:      | Complementary medicine, Epidemiology, Global health                                                                                                                                                                                                                                                                                                                                                                                                                                                                                                                                                                                                                                                                                                                                                                                                                                         |
| Keywords:                       | Hypertension < CARDIOLOGY, NUTRITION & DIETETICS, PUBLIC HEALTH                                                                                                                                                                                                                                                                                                                                                                                                                                                                                                                                                                                                                                                                                                                                                                                                                             |
|                                 |                                                                                                                                                                                                                                                                                                                                                                                                                                                                                                                                                                                                                                                                                                                                                                                                                                                                                             |

SCHOLARONE™  
Manuscripts

1  
2  
3  
4  
5  
6  
7  
8  
9  
10  
11  
12  
13  
14  
15  
16  
17  
18  
19  
20  
21  
22  
23  
24  
25  
26  
27  
28  
29  
30  
31  
32  
33  
34  
35  
36  
37  
38  
39  
40  
41  
42  
43  
44  
45  
46  
47  
48  
49  
50  
51  
52  
53  
54  
55  
56  
57  
58  
59  
60

## SALT INTAKE ASSESSED BY 24-HOUR URINARY SODIUM EXCRETION IN A RANDOM AND OPPORTUNISTIC SAMPLE IN AUSTRALIA

*Corresponding Author:*

Miss Mary-Anne Land  
The George Institute for Global Health  
PO BOX M201 Missenden Road  
Camperdown, NSW, AUSTRALIA  
2050.  
T: +61 2 9993 4547  
E: [maland@georgeinstitute.org.au](mailto:maland@georgeinstitute.org.au)

Authors: Mary-Anne LAND<sup>a,b</sup>, Jacqui WEBSTER<sup>a,b</sup>, Anthea, CHRISTOFOROU<sup>a,b</sup>, D  
PRAVEEN<sup>a,b</sup>, Paul JEFFERY<sup>c</sup>, John CHALMERS<sup>a,b</sup>, Wayne SMITH<sup>d</sup>, Mark  
WOODWARD<sup>a,b</sup>, Federica BARZI<sup>a,b</sup>, Caryl NOWSON<sup>c</sup>, Victoria FLOOD<sup>e</sup>, Bruce NEAL<sup>a,b</sup>.

Affiliations: <sup>a</sup>The George Institute for Global Health, Sydney, Australia, <sup>b</sup>The University of  
Sydney, Sydney, Australia, <sup>c</sup>Deakin University Melbourne, Australia, <sup>d</sup>New South Wales  
Health, Sydney, Australia, <sup>e</sup>The University of Wollongong, Wollongong, Australia.

TABLES: 3

FIGURES: 1

SUPPLEMENTARY: 0

WORD COUNT: 2907

KEY WORDS: Salt, sodium, 24-hour urine, cardiovascular disease prevention

## Abstract

**Introduction:** The gold standard method for measuring population salt intake is based on a 24-hour urine collection. However, because participant burden is high, response rates are typically low with less than one in four agreeing to provide specimens. At this low level of response it is possible that simply asking for volunteers would produce equally valid results.

**Method:** We randomly selected 2152 adults from Lithgow, New South Wales and obtained usable 24-hour urine samples from 306 (response rate 16%). Specimens were also collected from a further 113 volunteers. Estimated salt consumption and the costs for each strategy were compared.

**Results:** The characteristics of the 'random' and 'volunteer' samples were moderately different in mean age 58 (standard deviation 14.6) vs. 49(17.7) years respectively;  $p < 0.001$ ) as well as self-reported alcohol use, tobacco use, history of hypertension and prescription drug use (all  $p < 0.04$ ). Overall crude mean 24-hour urinary salt excretion was 8.9(3.6)(g/d) in the random sample vs. 8.5(3.3)g/d for the volunteers ( $p = 0.42$ ). Corresponding age- and sex-adjusted estimates were 9.2(3.3)g/d and 8.8(3.4)g/d ( $p = 0.29$ ). Estimates for men 10.3(3.8) vs. 9.6(3.3)g/d;  $p = 0.26$ ) and women 7.6(3.0) vs. 7.9(3.2)g/d;  $p = 0.43$ ) were also similar for the two samples, as was salt excretion across age groups ( $p = 0.72$ ). The cost of obtaining each 24-hour urine sample was two times greater for the random compared to volunteer samples (A\$62 vs. A\$31).

**Conclusion:** The estimated salt consumption derived from the two samples were comparable and were not substantively different to estimates obtained from other surveys.



1  
2  
3  
4 In countries where salt is pervasive and cannot easily be avoided, estimates of consumption  
5  
6 obtained from volunteer samples may be valid and less costly.  
7  
8  
9

### 10 11 *Article Focus* 12

13  
14 The Global Monitoring Framework for the Prevention and Control of NCDs has set a salt  
15  
16 reduction target of 30% by 2025. The assessment of population salt intake underpins the  
17  
18 implementation of salt reduction policies and evaluates progress. The gold standard method  
19  
20 for assessing population salt intake is the collection of a 24-hour urine specimen. However,  
21  
22 because of the high burden, participation rates are generally low and the cost is often high.  
23  
24 Hence there is great interest in alternative, yet robust and affordable methods to assess salt  
25  
26 intake.  
27  
28  
29  
30  
31  
32

### 33 *Key Messages* 34

35 The observation that an opportunistically recruited volunteer population sample appears to  
36  
37 provide a reasonable estimate of salt intake is important because this could substantially  
38  
39 reduce the cost of future monitoring efforts. If this finding was repeated in other settings  
40  
41 this would have global implications, as the reporting of salt intake in 2015, 2020 and 2025  
42  
43 is encouraged as part of the Global Monitoring Framework for the Prevention and Control  
44  
45 of NCDs.  
46  
47  
48  
49  
50  
51

### 52 *Strengths and Limitations* 53 54 55 56 57 58 59 60

1  
2  
3  
4 The 'Gold Standard' 24-hour urine method was used to estimate salt intake. The response  
5  
6 rate for the random sample was low and the study location was a single town but the  
7  
8 response rate and estimated level of salt excretion is not substantively different from that  
9  
10 reported in a number of diverse population groups throughout the country.  
11  
12  
13  
14  
15  
16  
17  
18  
19  
20  
21  
22  
23  
24  
25  
26  
27  
28  
29  
30  
31  
32  
33  
34  
35  
36  
37  
38  
39  
40  
41  
42  
43  
44  
45  
46  
47  
48  
49  
50  
51  
52  
53  
54  
55  
56  
57  
58  
59  
60

For peer review only

## Background

Non-communicable diseases (NCDs) are the leading cause of death accounting for an estimated 35 million (66%) of the 53 million deaths at all ages that occurred in 2010.[1] Raised blood pressure is the leading risk factor for global disease burden, and is estimated to cause 9·4 million deaths every year—more than half of the estimated 17 million deaths a year caused by cardiovascular disease.[2] Much evidence shows that a reduction in salt intake lowers blood pressure and there is a high likelihood that this would reduce the risk of cardiovascular disease.[3] While there is not a current definitive estimate of population dietary salt intake in Australia, it is widely accepted that average consumption is between 7 and 12g/d[4] far above the suggested dietary target for Australians of 4g/d.[5]

The reduction of salt intake and salt content of food has been strongly recommended as a cost effective action that should be undertaken immediately, with expected accelerated results in terms of lives saved, cases of disease prevented and costs avoided.[6] This position has since been historically endorsed by the 2011 Political Declaration of the United Nations High Level Meeting on NCDs[7] which led to the development and adoption of the Global Monitoring Framework and Voluntary Global Targets for the Prevention and Control of NCDs in which salt reduction is a core target.[8]

Measurement of population salt consumption is fundamental for planning and monitoring salt reduction policies and the gold standard method is based upon a 24-hour urine collection from a random community sample. Surveys of this type are, however, complex

1  
2  
3  
4 and expensive and because participant burden is high, randomly selected community  
5 samples typically have low response rates.[9-11] This has been noted as a significant  
6 concern at recent WHO NCD surveillance, monitoring and evaluation consultation  
7 meetings in which several member states have expressed doubts about the feasibility of  
8 using this method.[12] The potential adverse impact that a low response rate might have on  
9 the conclusions drawn was highlighted and the need for further research into practicable  
10 methods for defining and monitoring population salt consumption was underlined.[12]  
11  
12  
13  
14  
15  
16  
17  
18  
19  
20  
21  
22

23 The objective of the present study was to estimate sodium excretion using assays of 24-  
24 hour urine samples collected from a regional Australian population. A key question about  
25 practicality was addressed by using both a standard random sampling approach to make the  
26 estimate while simultaneously recruiting an opportunistic (volunteer) sample to make an  
27 alternate estimate. The study also examined the costs associated with each strategy.  
28  
29  
30  
31  
32  
33  
34  
35

## 36 **Methods**

37  
38 The data derived from a random sample and a convenience sample (volunteers) done  
39 concurrently in Lithgow, New South Wales, Australia between March and June 2011.  
40  
41 Permission to undertake the study was obtained from the Lithgow City Council and the  
42 project was approved by the University of Sydney Human Research Ethics Committee.  
43  
44  
45  
46  
47  
48  
49  
50

## 51 **Inclusion and exclusion criteria**

52  
53 Consenting individuals aged 20 years or above who were resident in Lithgow and listed on  
54 the 2009 Federal electoral roll were eligible for inclusion. There was no exclusion based on  
55  
56  
57  
58  
59  
60

1  
2  
3  
4 inter-current illness, use of medications or any other aspect of demography or personal  
5  
6 history.  
7  
8  
9

### 10 11 **Selection and recruitment process**

12  
13  
14 *Random sampling* was done by selecting individuals at random from the electoral roll. The  
15  
16 electoral roll provided the name and address of each potential participant with electronic  
17  
18 databases searched to identify corresponding telephone numbers. Based on the assumption  
19  
20 that approximately 25% of invited individuals would participate, 2152 individuals were  
21  
22 selected to reach the desired sample size.  
23  
24

25  
26  
27  
28 Potential participants were first mailed invitations to take part in the survey, with an  
29  
30 explanation of the purpose of the study, a participant information sheet and a consent form  
31  
32 provided. These individuals were then contacted by telephone to determine their  
33  
34 willingness to participate and to schedule an interview time. Where a telephone number  
35  
36 could not be obtained, the home address was visited by a member of the research team and  
37  
38 willingness to participate was discussed face-to-face.  
39  
40  
41  
42

43  
44  
45 *Volunteer sampling* was done by offering participation in the study to individuals at two  
46  
47 local shopping centres over several weeks. An information booth was established where  
48  
49 those interested could seek further information about participation and arrange a visit by a  
50  
51 member of the study team. Recruitment was completed at the time of the inquiry made to  
52  
53 the study staff member manning the information booth.  
54  
55  
56

### Data collection process

Data collection for randomly selected individuals and the volunteer sample was identical and commenced with a visit to the study participant by a trained research assistant. Once consent was obtained the three components of data collection, comprising a questionnaire, a physical examination and a 24-hour urine collection were initiated. The questionnaire and physical examination were completed at the time of the visit and the urine collection was scheduled to be done within the following three days.

The *questionnaire* was fully structured and administered by research assistants, with all responses based on self-report. The questionnaire recorded information on socio-demographic variables, vascular disease history and current drug treatments. Participants were asked to provide the names of regular medications but if that was not known the purpose of the medication was recorded (for example, anti-hypertensive medication).

*The physical examination* comprised measurement of body weight (using calibrated Tania HD-357 portable electronic scales (USA) and height (using a calibrated portable stadiometer Wedderburn WS-HRP model (Australia)) to the nearest 0.1kg and 0.1cm respectively, with body mass index ( $\text{kg}/\text{height}(\text{m}^2)$ ) then calculated. Blood pressure was measured using a manual inflation blood pressure monitor (A&D UA-&704) in triplicate, according to the American Heart Association protocol.[13]

1  
2  
3  
4 *A single 24-hour urine collection* was obtained with the first voided urine upon waking on  
5  
6 the day of collection being discarded and participants then collecting all voided urine up to  
7  
8 and including the first void the following morning. The time at the beginning and the end  
9  
10 of urine collection were recorded. The urine volume was noted and the urinary sodium  
11  
12 concentration in an aliquot was measured by ion-selective electrode with the buffered  
13  
14 kinetic Jaffe reaction without deproteinisation used for assay of urine creatinine (Cobas  
15  
16 Integra 400). Suspected inaccurate urine collections (i.e. urinary creatinine < 4.0 mmol/day  
17  
18 for women, or < 6.0mmol/day for men, or a 24-hour urine collection of < 500ml for either  
19  
20 sex) and extreme outliers for urinary creatinine (i.e. > 3 standard deviations from the mean)  
21  
22 were excluded. The rates of exclusion were similar for the random and volunteer samples.  
23  
24 For each individual, the 24-hour sodium excretion value (mmol/day) was calculated as the  
25  
26 concentration of sodium in the urine (mmol/L) multiplied by the urinary volume (L/day).  
27  
28 The conversion from sodium (Na) to salt (NaCl) was made by multiplying the sodium  
29  
30 value by 2.542 ( $\text{NaCl(g)} = \text{Na(g)} \times 2.542$ ).  
31  
32  
33  
34  
35  
36  
37  
38  
39

#### 40 **Cost data**

41  
42 The pre-interview costs involved staff time in selecting and attempting to reach subjects  
43  
44 including accessing the electoral roll, sending participant invitations, follow-up phone calls  
45  
46 and door-knocking to schedule interviews with those randomly selected, as well as setting  
47  
48 up and manning an information booth to engage the volunteer sample were documented.  
49  
50 The post-interview costs comprised primarily of pathology expenses and were the same for  
51  
52 each sample.  
53  
54  
55  
56  
57  
58  
59  
60

## Statistical analyses

The baseline characteristics of the sample selected at random and the volunteer sample were summarized and compared using t-tests and Chi-square tests as were their average urinary sodium values. In addition to the crude estimates described above, weighted estimates of overall population mean sodium excretion were also made in an effort to account for the non-random sampling of individuals. This was done for both the randomly selected group (to adjust for the poor response rate) and for the volunteer group (to adjust for their non-representative age and sex structure) by calculating age- and sex-specific estimates of salt excretion for 20 year age bands (20-39, 40-59, and 60 plus) for men and women and then weighting these by the age and sex structure of the population to obtain an overall estimate for the community. Regression models were fitted to explore the association between baseline participant characteristics and a range of covariates in the combined (random plus volunteer) sample. Throughout, a p-value of 0.05 or less was taken to indicate a finding unlikely to have arisen solely by chance. Statistical analyses were conducted using SPSS for Windows (Version 21, SPSS Inc, Chicago, IL) and STATA for windows (StataCorp. 2009 *Strata Statistical Software: Release 11*. College Station, TX: StataCorp LP).

## Results

Of 2,152 individuals selected by random sampling of the electoral roll, 853 (40%) were uncontactable after multiple attempts, 126 (5.8%) were ineligible because they had moved out of the study area, 5 (0.2%) had died and 843 (39%) declined to participate. The remaining 329 individuals comprise the 'random' sample with a response rate of 16%. The volunteer



1  
2  
3  
4 sample comprised 120 individuals recruited consecutively at a shopping mall over a seven  
5  
6 day period. The characteristics of the random and volunteer samples were moderately  
7  
8 different in a number of regards, including age, proportion tobacco use, alcohol use, self-  
9  
10 reported hypertension and use of any prescription medication (Table 1).  
11  
12  
13

### 14 15 16 **Crude and weighted 24-hour urinary salt excretion in random and volunteer samples**

17  
18 For the analysis there were 306 individuals in the random sample and 113 in the volunteer  
19  
20 group with 20 excluded because of suspected incomplete urine collections and 10 for other  
21  
22 reasons (Figure 1). The crude mean 24-hour urinary salt excretion was 8.9 (standard  
23  
24 deviation 3.6) g/d in the random sample and 8.5 (3.3) g/d in the volunteer group (p=0.42).  
25  
26 The corresponding weighted estimates for the Lithgow population were 9.2 (3.9) g/d and  
27  
28 8.8 (3.4) g/d respectively (p=0.29).  
29  
30  
31  
32  
33  
34

35 The proportion of randomly sampled individuals exceeding the 6 g/d recommended  
36  
37 Maximum Level for Australians was 79%, the proportion exceeding the Australian  
38  
39 Suggested Dietary Target of 4 g/d was 94% and the proportion exceeding the WHO  
40  
41 Maximum Recommended Level of 5 g/d was 87%. The corresponding proportions for the  
42  
43 volunteer group were 75%, 93% and 84%. Population-weighted estimates of these  
44  
45 proportions were not substantively different.  
46  
47  
48  
49  
50  
51

### 52 **24-hour urinary salt excretion in participant subgroups**

53  
54  
55  
56  
57  
58  
59  
60

1  
2  
3  
4 Urinary sodium excretion in both population samples was significantly higher in men  
5 compared to women 10.3 (3.8) g/d vs. 7.6 (3.0) g/d;  $p < 0.001$  for random sample and 9.6  
6  
7 (3.3) g/d vs. 7.9 (3.2) g/d;  $p = 0.006$  for the volunteer sample (Table 2) and this was also true  
8  
9 for every age group. There was an inverse association between daily salt excretion and age  
10  
11 (Table 2) such that for every decade increase in age there was 0.3g/d less excretion of salt  
12  
13 ( $p = 0.007$ ). The association between salt excretion and BMI was positive with every unit  
14  
15 rise in BMI associated with a 0.16g/d greater excretion of salt ( $p < 0.001$ ). Similar patterns  
16  
17 were observed in both the random and volunteer population samples. There were no other  
18  
19 significant associations observed between salt excretion levels and recorded participant  
20  
21 characteristics including education, health status, tobacco use, alcohol use, blood pressure,  
22  
23 disease history or prescription drug use (all  $p > 0.05$ ).  
24  
25  
26  
27  
28  
29  
30  
31  
32

### 33 **Costs associated with random and volunteer survey methods**

34  
35 The two main costs associated with doing the study were staff salaries and pathology  
36  
37 expenses. Due primarily to the increased staff time required for the selection and  
38  
39 interaction with the randomly selected individuals the estimated average cost associated  
40  
41 with obtaining a valid 24-hour urine sample was greater for each participant in the random  
42  
43 sample (about AUD\$ 62) compared to each participant in the volunteer sample (about  
44  
45 AUD\$ 31).  
46  
47  
48  
49

### 50 **Discussion**

51  
52  
53 In this population salt intake greatly exceeds the recommended levels, reaffirming the  
54  
55 urgent need for concerted action to address salt consumption in Australia. Mean salt  
56  
57

1  
2  
3  
4 excretion levels were some 50% higher than maximum recommended levels[5, 14] and  
5  
6 only about one in every twenty individuals was found to be consuming the level of salt  
7  
8 recommended for good health. Even these data are likely to be an under-estimate of the  
9  
10 problem because the approximate 10% of salt excreted by the gastro-intestinal system and  
11  
12 the skin will have gone unrecorded.[15] The level of excess salt consumption indicated by  
13  
14 this survey would be anticipated to cause substantial disease burden in Australia leading  
15  
16 both to large numbers of lives lost prematurely and to many individuals suffering  
17  
18 significant disability.[16] With centrally implemented salt reduction programs projected to  
19  
20 deliver large population health gains at very low cost [17-19], the implementation of an  
21  
22 effective salt reduction program should be a priority for the government of Australia.[20,  
23  
24  
25  
26  
27  
28 21]

29  
30  
31  
32  
33 The observation that the volunteer sample produced similar findings to the random sample  
34  
35 is important because it was much easier and less costly to collect data from the volunteer  
36  
37 sample than from the random sample. There are several reasons why a volunteer sample  
38  
39 might provide a similar result to a random sample when estimating population salt  
40  
41 consumption from 24-hour urine samples. First, the response rate in a random sample from  
42  
43 whom a 24-hour urine sample is sought is typically very low, averaging 20% (range 9.7%  
44  
45 to 26.8%) in a series of recently reported studies.[9-11, 20] In this situation the random  
46  
47 sample effectively becomes a volunteer sample and any biases consequent upon using a  
48  
49 volunteer sample might also be apparent in the 'random' sample. That said, there were  
50  
51 many differences between the characteristics of the random and volunteer samples included  
52  
53  
54  
55  
56  
57  
58  
59  
60

1  
2  
3  
4 in this study but these did not translate into detectable differences in the observed sodium  
5 excretion. Another possible explanation therefore is the ubiquitous nature of salt in the  
6 food supply[22] and the rather limited capacity of even motivated individuals to  
7 meaningfully modify their salt consumption,[23] thereby minimizing the impact of any  
8 “healthy volunteer” effect.[24]  
9  
10  
11  
12  
13  
14  
15  
16  
17  
18

19 In some countries it may be possible to achieve better response rates[25, 26] and in others it  
20 may be that specific dietary practices or other cultural factors will mean that a volunteer  
21 sample will not give a good measure of true population salt intake. If, however, the  
22 findings reported here are observed elsewhere, volunteer sampling might provide a low-  
23 cost alternate to traditional random sampling techniques. At the very least it may be  
24 possible to use a volunteer sample to demonstrate the need for action - most countries in the  
25 world are likely to have salt consumption levels far above the WHO consumption target of  
26 <5g/d, and the likelihood that the selection of a volunteer sample will lead to an under-  
27 recording of salt consumption of a very large magnitude is probably fairly small.  
28  
29  
30  
31  
32  
33  
34  
35  
36  
37  
38  
39  
40  
41  
42

43 In addition to the baseline assessment required to justify the commencement of a salt  
44 reduction strategy, ongoing monitoring of salt consumption is required to objectively  
45 determine program efficacy. If the resources required to conduct high quality surveys of a  
46 random population sample can be acquired then this remains the optimal approach both to  
47 baseline evaluation and monitoring of progress. If not, then repeat surveys of volunteers  
48 are likely to be of value if the methods used for participant selection are identical on each  
49  
50  
51  
52  
53  
54  
55  
56  
57  
58  
59  
60

1  
2  
3  
4 occasion – if the biases are the same on each measurement occasion then any real rise or  
5  
6 fall in salt consumption should be clearly apparent.  
7  
8  
9

10  
11 The cost estimates made for this study showed that recruiting the volunteer sample was a  
12 significantly less expensive exercise than recruiting the random population sample. The  
13 primary reason for this was the much reduced fieldwork time required for the per capita  
14 recruitment of the volunteer sample. Pathology and other recorded costs were otherwise  
15 approximately the same. Expenses that were not specifically determined were the costs of  
16 computer hardware, computer software, the training of the field staff, and the time required  
17 for supervision by the project manager. The last two of these are also likely to have been  
18 lower for the volunteer sample due to the simplified and more rapid recruitment process  
19 and, as a consequence, the reported difference between costs is likely to have been under-,  
20 rather than over-estimated.  
21  
22  
23  
24  
25  
26  
27  
28  
29  
30  
31  
32  
33  
34  
35  
36  
37

### 38 **Strengths and limitations**

39 The ‘Gold Standard’ 24-hour urine method was used to estimate salt intake with standard  
40 checks for completeness of the specimens based upon urine volume and urine creatinine  
41 excretion. The response rate for the random sample was low but comparable to other  
42 studies done in similar settings over recent years.[9-11] The sample size was relatively  
43 small and results for subgroups are somewhat imprecise as a consequence. It is possible,  
44 for this same reason, that the study may have failed to identify small, but real, differences  
45 between the salt excretion levels determined by the two different population sampling  
46  
47  
48  
49  
50  
51  
52  
53  
54  
55  
56  
57  
58  
59  
60

1  
2  
3  
4 methods. The location of the study in a single town in a regional area of New South Wales  
5  
6 compromises the direct generalizability of the study findings to Australia as a whole,  
7  
8 although the estimated level of salt excretion is not substantively different from that  
9  
10 reported in a number of diverse population groups throughout the country.[27-39]  
11  
12  
13

## 16 **Conclusion**

18  
19 These data affirm that current efforts to reduce salt intake in Australia are failing, with a  
20  
21 large majority of the population studied consuming more than the recommended Australian  
22  
23 Upper Limit of 6g/d and almost everyone eating more than the Suggested Dietary Target of  
24  
25 4g/day. The observation that an opportunistically recruited volunteer population sample  
26  
27 appears to provide a reasonable estimate of salt intake is important because this could  
28  
29 substantially reduce the cost of future monitoring efforts. If this finding was repeated in  
30  
31 other settings this would have global implications because sodium reduction has been  
32  
33 proposed to all member states by the WHO. Most countries, however, have very limited  
34  
35 resources available and any reduction in program cost that can be achieved without  
36  
37 seriously adversely affecting program quality will be an important step forward. With  
38  
39 population-based salt reduction strategies already shown to be cost effective or cost-saving  
40  
41 in most settings, these new data further support the feasibility of widespread rollout of  
42  
43 national salt reduction efforts around the world.  
44  
45  
46  
47  
48  
49  
50  
51  
52  
53  
54  
55  
56  
57  
58  
59  
60

**TABLE 1. CHARACTERISTICS OF RANDOM AND VOLUNTEER SAMPLES**

|                                                             | Random sample<br>(n=306) | Volunteer sample<br>(n=113) | p-value |
|-------------------------------------------------------------|--------------------------|-----------------------------|---------|
| Female (%)                                                  | 52.9                     | 61.9                        | 0.10    |
| Age, years (mean)                                           | 57.6                     | 49.3                        | <0.001  |
| Height, cm (mean)                                           | 167.5                    | 167.6                       | 0.85    |
| Weight, kg (mean)                                           | 81.8                     | 83.9                        | 0.30    |
| BMI, kg/m <sup>2</sup> (mean)                               | 29.1                     | 29.8                        | 0.27    |
| Systolic bp, mmHg (mean)                                    | 126.7                    | 123.7                       | 0.16    |
| Diastolic bp, mmHg (mean)                                   | 78.7                     | 78.9                        | 0.88    |
| Education                                                   |                          |                             | 0.22    |
| -Secondary (%)                                              | 63.7                     | 55.8                        |         |
| -Tertiary (%)                                               | 25.5                     | 32.7                        |         |
| -Postgraduate (%)                                           | 10.8                     | 11.5                        |         |
| Health Status                                               |                          |                             | 0.21    |
| -Very good (%)                                              | 50.3                     | 48.7                        |         |
| -Good (%)                                                   | 29.4                     | 23.9                        |         |
| -Fair (%)                                                   | 20.2                     | 27.4                        |         |
| Current smoker (> 1 / day) (%)                              | 8.2                      | 22.1                        | <0.001  |
| Ever smoked (> 1 / day) (%)                                 | 41.2                     | 53.1                        | 0.03    |
| Alcoholic consumption (time since last consumption)         |                          |                             | 0.04    |
| One week or less (%)                                        | 62.1                     | 42.5                        |         |
| > one week < 12months (%)                                   | 19.9                     | 34.5                        |         |
| 12 months or more (%)                                       | 11.1                     | 10.6                        |         |
| Never (%)                                                   | 6.9                      | 12.4                        |         |
| Have you ever been told by a doctor or nurse that you have: |                          |                             |         |
| -high blood pressure (%)                                    | 44.1                     | 30.1                        | 0.03    |
| -low blood pressure (%)                                     | 15.4                     | 14.2                        | 0.76    |
| -high cholesterol (%)                                       | 37.3                     | 30.0                        | 0.16    |
| -heart attack (%)                                           | 8.2                      | 3.5                         | 0.10    |
| -stroke (%)                                                 | 3.9                      | 1.8                         | 0.37    |
| -angina (%)                                                 | 6.9                      | 4.4                         | 0.36    |
| -diabetes (%)                                               | 11.1                     | 7.1                         | 0.26    |
| Prescription Medication Use*                                |                          |                             |         |
| Antihypertensive (%)                                        | 15.4                     | 15.0                        | 0.54    |

|                                 |      |      |      |
|---------------------------------|------|------|------|
| Lipid lowering (%)              | 11.1 | 7.1  | 0.62 |
| Aspirin (%)                     | 8.8  | 2.7  | 0.06 |
| Glucose lowering (%)            | 22.5 | 7.1  | 0.17 |
| Any prescription medication (%) | 73.9 | 59.2 | 0.02 |

\*Participants could be taking more than one prescribed medication

For peer review only



TABLE 2. URINARY SALT EXCRETION (GRAMS/DAY)

|                                                      | Random sample<br>(n=306) |              | Volunteer sample<br>(n=113) |              | P value     |
|------------------------------------------------------|--------------------------|--------------|-----------------------------|--------------|-------------|
|                                                      | Mean                     | (SD)         | Mean                        | (SD)         |             |
| <b>Overall crude</b>                                 | <b>8.9</b>               | <b>(3.6)</b> | <b>8.5</b>                  | <b>(3.3)</b> | <b>0.42</b> |
| <b>Overall weighted*</b>                             | <b>9.2</b>               | <b>(3.9)</b> | <b>8.8</b>                  | <b>(3.4)</b> | <b>0.29</b> |
| Female                                               |                          |              |                             |              | 0.27        |
| 20-39                                                | 8.7                      | (4)          | 7.9                         | (2.9)        |             |
| 40-59                                                | 8                        | (3.1)        | 7.8                         | (3.8)        |             |
| 60+                                                  | 6.8                      | (2.4)        | 7.9                         | (2.6)        |             |
| All female                                           | 7.6                      | (3)          | 7.9                         | (3.2)        |             |
| Male                                                 |                          |              |                             |              | 0.40        |
| 20-39                                                | 10.8                     | (4.7)        | 10.5                        | (3.9)        |             |
| 40-59                                                | 11.1                     | (4.2)        | 9.8                         | (3.0)        |             |
| 60+                                                  | 9.7                      | (3.1)        | 8.6                         | (3.0)        |             |
| All male                                             | 10.3                     | (3.8)        | 9.6                         | (3.3)        |             |
| Education                                            |                          |              |                             |              | 0.25        |
| Secondary                                            | 9.1                      | (3.7)        | 8.9                         | (3.4)        |             |
| Tertiary                                             | 8.3                      | (3.0)        | 8.5                         | (3.3)        |             |
| Post graduate                                        | 8.4                      | (3.6)        | 8                           | (3.3)        |             |
| Health Status                                        |                          |              |                             |              | 0.89        |
| Very Good                                            | 8.7                      | (3.8)        | 8                           | (2.9)        |             |
| Good                                                 | 8.8                      | (3.5)        | 9.3                         | (3.7)        |             |
| Fair                                                 | 8.7                      | (2.8)        | 8.3                         | (2.6)        |             |
| Current Smoker                                       | 9                        | (3.8)        | 8.8                         | (3.4)        | 0.82        |
| Ever Smoked                                          | 8.8                      | (3.6)        | 9                           | (3.6)        | 0.74        |
| Alcohol Consumption<br>(time since last consumption) |                          |              |                             |              | 0.45        |
| One week or less                                     | 8.8                      | (3.8)        | 8.7                         | (3.8)        |             |
| > one week < 12months                                | 8.6                      | (3.2)        | 8.7                         | (2.9)        |             |
| 12 months or more                                    | 9.3                      | (3.8)        | 7.8                         | (2.8)        |             |
| Never                                                | 9.1                      | (3.2)        | 8.1                         | (3.6)        |             |

\*Adjusted for response rate (random sample) and non-random selection (volunteer sample) by weighting age-and sex-specific estimates to the age and sex structure of the Lithgow population

**TABLE 3. COST OF RANDOM COMPARED TO VOLUNTEER SAMPLING (AUD)**

|                                     | <b>Random<br/>Sample(n=306)</b> | <b>Volunteer<br/>Sample(n=113)</b> |
|-------------------------------------|---------------------------------|------------------------------------|
| <b>Pre-interview costs</b>          |                                 |                                    |
| <b>Sampling from electoral roll</b> | \$2,152                         | 0                                  |
| <b>Scheduling interviews</b>        | \$8,704                         | \$1,088                            |
| <b>Post-interview costs</b>         |                                 |                                    |
| <b>Pathology costs</b>              | \$4,211                         | \$1,584                            |
| <b>Other costs</b>                  |                                 |                                    |
| <b>Postage</b>                      | \$2,169                         | 0                                  |
| <b>Telephone</b>                    | \$1,870                         | \$818                              |
| <b>Shopping centre stand fee</b>    |                                 | \$10                               |
| <b>TOTAL</b>                        | <b>\$19,106</b>                 | <b>\$3,500</b>                     |
| <b>COST PER PARTICIPANT*</b>        | <b>\$62.44</b>                  | <b>\$30.96</b>                     |

\*Cost per participant calculated by dividing total cost by the number of valid participants in each sample.

FIGURE 1. RECRUITMENT OF POPULATION SAMPLE

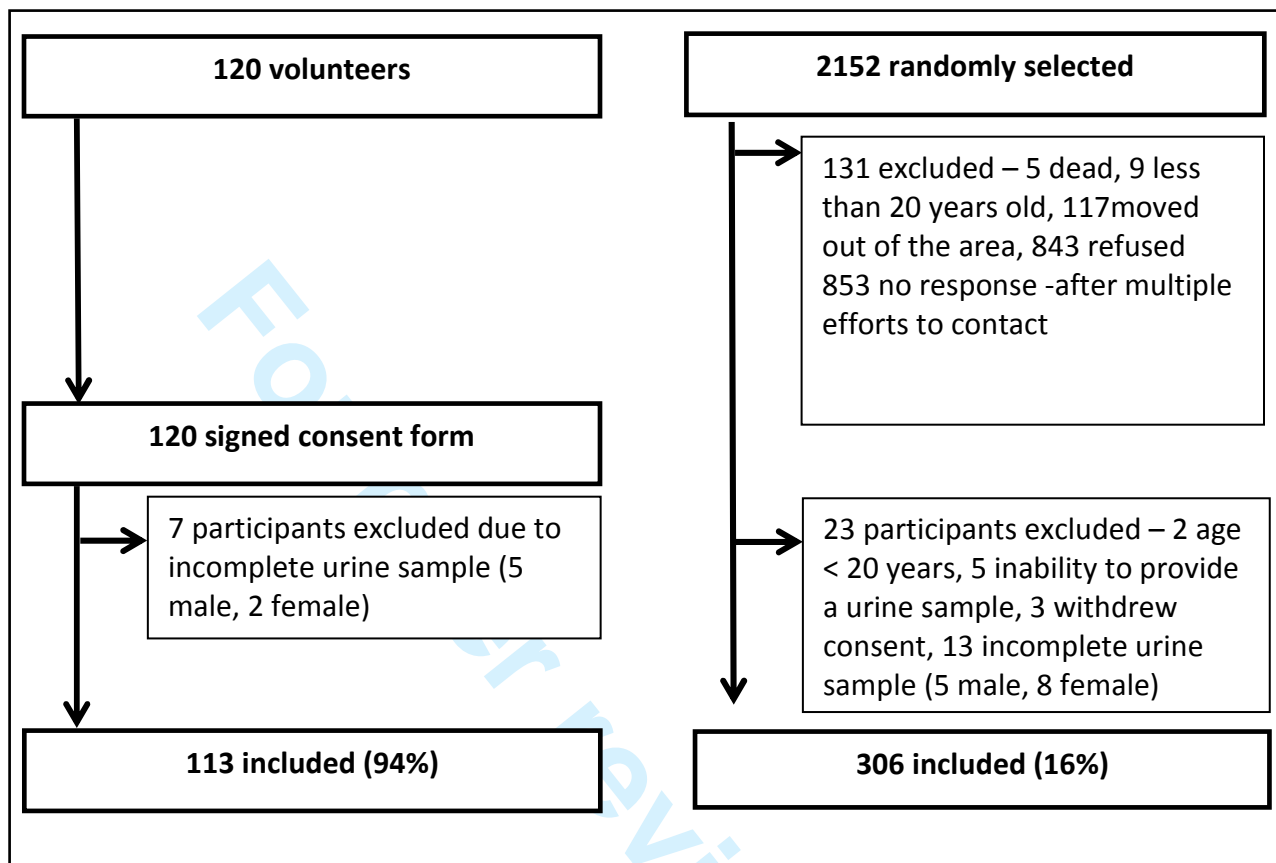

## Acknowledgments

The authors thank Lithgow City Council, the Nepean Blue Mountains Local Area Health Network for their support and most importantly all of the participants for their support and interest in the study.

## Contributorship Statement

All authors fulfill the ICMJE guidelines for authorship and have approved the final version of the manuscript submitted to BMJ Open.

Mary-Anne Land - contributed to study concept and design, data collection, analysis and interpretation of the data, drafting the article and final version of the article.

Jacqui Webster - contributed to the study design, revising content and final approval of the version to be published.

Anthea Christoforou – contributed to the analysis of data, revising content and final approval of the version to be published

D Praveen – contributed to the analysis and interpretation of data, revising content and final approval of the version to be published.

Paul Jeffery – contributed to the study design, interpretation of data, revising content and final approval of the version to be published.

John Chalmers – contributed to the conception and study design, revising critically and final approval of the version to be published.

Wayne Smith - contributed to the conception and study design, revising critically and final approval of the version to be published.

1  
2  
3 Mark Woodward – contributed to the conception and study design, revising critically and final  
4 approval of the version to be published.  
5  
6

7  
8 Federica Barzi – contributed to the analysis and interpretation of the data, revising critically and  
9 final approval of the version to be published.  
10  
11

12  
13 Caryl Nowson - contributed to the conception and study design, revising critically and final  
14 approval of the version to be published.  
15  
16

17  
18 Victoria Flood - contributed to the conception and study design, revising critically and final  
19 approval of the version to be published.  
20  
21

22  
23 Bruce Neal – contributed to the conception and study design, analysis and interpretation of data,  
24 drafting of the article, revising critically and final approval of the version to be published.  
25  
26

### 27 **Sources of support**

28  
29 This work was supported by a National Health and Medical Research Council (NHMRC) of  
30 Australia partnership project (Neal #13372) which includes The George Institute for Global  
31 Health in partnership with the Australian Division of World Action on Salt and Health; the  
32 Australian Food and Grocery Council; the New South Wales Food Authority; and New South  
33 Wales Health. Bruce Neal was supported by an Australian Research Council Future Fellowship,  
34 Mark Woodward by a NHMRC Fellowship and Jacqui Webster by a National Heart Foundation  
35 and Stroke Foundation postdoctoral research fellowship.  
36  
37  
38  
39  
40  
41  
42  
43  
44  
45

### 46 **Conflicts of interest**

47  
48 J.W. is the co-ordinator, and B.N. is the Chairman of the Australian Division of World Action on  
49 Salt and Health.  
50  
51  
52  
53  
54  
55  
56  
57  
58  
59  
60

## References

1. Lozano, R., et al., *Global and regional mortality from 235 causes of death for 20 age groups in 1990 and 2010: a systematic analysis for the Global Burden of Disease Study 2010*. Lancet, 2012. **380**(9859): p. 2095-128.
2. Lim, S.S., et al., *A comparative risk assessment of burden of disease and injury attributable to 67 risk factors and risk factor clusters in 21 regions, 1990-2010: a systematic analysis for the Global Burden of Disease Study 2010*. Lancet, 2012. **380**(9859): p. 2224-60.
3. He, F.J., N.R. Campbell, and G.A. MacGregor, *Reducing salt intake to prevent hypertension and cardiovascular disease*. Rev Panam Salud Publica, 2012. **32**(4): p. 293-300.
4. Keogh, J.B. and P.M. Clifton, *Salt intake and health in the Australian population*. Med J Aust, 2008. **189**(9): p. 526.
5. National Health and Medical Research Council, *Nutrient Reference Values for Australia and New Zealand*, 2006, Department of Health and Ageing.
6. The World Health Organisation, *2008-2013 Action Plan for the Global Strategy for the Prevention and Control of Noncommunicable Diseases*, 2008.
7. United Nations. *2011 High Level Meeting on Prevention and Control of Non-communicable Diseases*. 2011 [cited 2012 12/12/2012]; Available from: <http://www.un.org/en/ga/ncdmeeting2011/>.
8. The World Health Organization, *Formal meeting of Member States to conclude the work on the comprehensive global monitoring framework, including indicators, and a set of voluntary global targets for the prevention and control of noncommunicable diseases Geneva, 5–7 November 2012*, 2012: Geneva.

- 1  
2  
3 9. Ribic, C.H., et al., *Salt intake of the Slovene population assessed by 24 h urinary sodium*  
4 *excretion*. Public Health Nutr, 2010. **13**(11): p. 1803-9.  
5  
6
- 7  
8 10. Chappuis, A., et al., *Swiss survey on salt intake: main results*. 2011.  
9
- 10 11. Ortega, R.M., et al., *Estimation of salt intake by 24 h urinary sodium excretion in a*  
11 *representative sample of Spanish adults*. Br J Nutr, 2011. **105**(5): p. 787-94.  
12  
13
- 14 12. The World Health Organisation, *European Regional Technical Consultation on*  
15 *Noncommunicable Disease Surveillance, Monitoring and Evaluation*. 2012.  
16  
17
- 18 13. Perloff, D., et al., *Human blood pressure determination by sphygmomanometry*. Circulation,  
19 1993. **88**(5 Pt 1): p. 2460-70.  
20  
21
- 22 14. The World Health Organization, *Reducing Salt Intake in Populations*, in *Report of a WHO*  
23 *Forum and Technical Meeting 2007*, World Health Organisation: Geneva.  
24  
25
- 26 15. Kirkendall, A.M., et al., *The effect of dietary sodium chloride on blood pressure, body*  
27 *fluids, electrolytes, renal function, and serum lipids of normotensive man*. J Lab Clin Med,  
28 1976. **87**(3): p. 411-34.  
29  
30
- 31 16. Cobiac, L.J., et al., *Which interventions offer best value for money in primary prevention of*  
32 *cardiovascular disease?* PLoS One, 2012. **7**(7): p. e41842.  
33  
34
- 35 17. Beaglehole, R., et al., *UN High-Level Meeting on Non-Communicable Diseases: addressing*  
36 *four questions*. Lancet, 2011. **378**(9789): p. 449-55.  
37  
38
- 39 18. National Heart Foundation of Australia, *Summary of evidence statement on the relationships*  
40 *between dietary electrolytes and cardiovascular disease*.  
41  
42  
43  
44  
45  
46  
47  
48  
49  
50  
51 [http://www.heartfoundation.org.au/SiteCollectionDocuments/Dietary-Electrolytes-CVD-](http://www.heartfoundation.org.au/SiteCollectionDocuments/Dietary-Electrolytes-CVD-Summary-Evidence.pdf)  
52 [Summary-Evidence.pdf](http://www.heartfoundation.org.au/SiteCollectionDocuments/Dietary-Electrolytes-CVD-Summary-Evidence.pdf), 2006.  
53  
54  
55  
56  
57  
58  
59  
60

19. Cook, N.R., et al., *Long term effects of dietary sodium reduction on cardiovascular disease outcomes: observational follow-up of the trials of hypertension prevention (TOHP)*. BMJ, 2007. **334**(7599): p. 885-8.
20. Brown, I.J., et al., *Salt intakes around the world: implications for public health*. Int J Epidemiol, 2009. **38**(3): p. 791-813.
21. Bibbins-Domingo, K., et al., *Projected Effect of Dietary Salt Reductions on Future Cardiovascular Disease*. N Engl J Med, 2010: p. NEJMoa0907355.
22. Webster, J.L., E.K. Dunford, and B.C. Neal, *A systematic survey of the sodium contents of processed foods*. Am J Clin Nutr, 2010. **91**(2): p. 413-20.
23. Kumanyika, S., *Behavioral aspects of intervention strategies to reduce dietary sodium*. Hypertension, 1991. **17**(1 Suppl): p. I190-5.
24. Lindsted, K.D., et al., *Healthy volunteer effect in a cohort study: temporal resolution in the Adventist Health Study*. J Clin Epidemiol, 1996. **49**(7): p. 783-90.
25. Tuomilehto, J., et al., *Community-based prevention of hypertension in North Karelia, Finland*. Ann Clin Res, 1984. **16 Suppl 43**: p. 18-27.
26. Staessen, J., et al., *Salt intake and blood pressure in the general population: a controlled intervention trial in two towns*. J Hypertens, 1988. **6**(12): p. 965-73.
27. Beard, T.C., et al., *The Hobart Salt Study 1995: few meet national sodium intake target*. Med J Aust, 1997. **166**(8): p. 404-7.
28. Jones, G., et al., *A population-based study of the relationship between salt intake, bone resorption and bone mass*. Eur J Clin Nutr, 1997. **51**(8): p. 561-5.
29. Bao, D.Q., et al., *Effects of dietary fish and weight reduction on ambulatory blood pressure in overweight hypertensives*. Hypertension, 1998. **32**(4): p. 710-7.



- 1  
2  
3  
4  
5  
6  
7  
8  
9  
10  
11  
12  
13  
14  
15  
16  
17  
18  
19  
20  
21  
22  
23  
24  
25  
26  
27  
28  
29  
30  
31  
32  
33  
34  
35  
36  
37  
38  
39  
40  
41  
42  
43  
44  
45  
46  
47  
48  
49  
50  
51  
52  
53  
54  
55  
56  
57  
58  
59  
60
30. Mori, Y., et al., *Effect of highly purified eicosapentaenoic acid ethyl ester on insulin resistance and hypertension in Dahl salt-sensitive rats*. *Metabolism*, 1999. **48**(9): p. 1089-95.
  31. Cumming, R.G., P. Mitchell, and W. Smith, *Dietary sodium intake and cataract: the Blue Mountains Eye Study*. *Am J Epidemiol*, 2000. **151**(6): p. 624-6.
  32. Nowson, C.A., T.O. Morgan, and C. Gibbons, *Decreasing dietary sodium while following a self-selected potassium-rich diet reduces blood pressure*. *J Nutr*, 2003. **133**(12): p. 4118-23.
  33. Nowson, C.A., et al., *Blood pressure response to dietary modifications in free-living individuals*. *J Nutr*, 2004. **134**(9): p. 2322-9.
  34. Ward, N.C., et al., *Oxidative stress in human hypertension: association with antihypertensive treatment, gender, nutrition, and lifestyle*. *Free Radic Biol Med*, 2004. **36**(2): p. 226-32.
  35. Hodgson, J.M., et al., *Partial substitution of carbohydrate intake with protein intake from lean red meat lowers blood pressure in hypertensive persons*. *Am J Clin Nutr*, 2006. **83**(4): p. 780-7.
  36. Margerison, C. and C. Nowson, *Dietary intake and 24-hour excretion of sodium and potassium*. *Asia Pac J Clin Nutr*, 2006. **15**: p. S37.
  37. Julie Boorman, J.C., Dorothy Mackerras., *Salt Intake From Processed Food and Discretionary Use in Australia*. Food Standards Australia New Zealand, ACT Australia  
Available at: [http://www.foodstandards.gov.au/srcfiles/Salt\\_Intake\\_5.pdf](http://www.foodstandards.gov.au/srcfiles/Salt_Intake_5.pdf)

- 1  
2  
3  
4  
5  
6  
7  
8  
9  
10  
11  
12  
13  
14  
15  
16  
17  
18  
19  
20  
21  
22  
23  
24  
25  
26  
27  
28  
29  
30  
31  
32  
33  
34  
35  
36  
37  
38  
39  
40  
41  
42  
43  
44  
45  
46  
47  
48  
49  
50  
51  
52  
53  
54  
55  
56  
57  
58  
59  
60
38. Brinkworth, G.D., et al., *Reductions in blood pressure following energy restriction for weight loss do not rebound after re-establishment of energy balance in overweight and obese subjects*. Clin Exp Hypertens, 2008. **30**(5): p. 385-96.
39. Charlton, K., et al., *Urinary sodium excretion, dietary sources of sodium intake and knowledge and practices around salt use in a group of healthy Australian women*. Aust N Z J Public Health, 2010. **34**(4): p. 356-63.

## SALT INTAKE ASSESSED BY 24-HOUR URINARY SODIUM EXCRETION IN A RANDOM AND OPPORTUNISTIC SAMPLE IN AUSTRALIA

### *Corresponding Author:*

Miss Mary-Anne Land  
The George Institute for Global Health  
PO BOX M201 Missenden Road  
Camperdown, NSW, AUSTRALIA  
2050.  
T: +61 2 9993 4547  
E: [maland@georgeinstitute.org.au](mailto:maland@georgeinstitute.org.au)

Authors: Mary-Anne LAND<sup>a,b</sup>, Jacqui, WEBSTER<sup>a,b</sup>, Anthea, CHRISTOFOROU<sup>a,b</sup>, D PRAVEEN<sup>a,b</sup>, Paul JEFFERY<sup>c</sup>, John CHALMERS<sup>a,b</sup>, Wayne SMITH<sup>d</sup>, Mark WOODWARD<sup>a,b</sup>, Federica BARZI<sup>a,b</sup>, Caryl NOWSON<sup>c</sup>, Victoria FLOOD<sup>c</sup>, Bruce NEAL<sup>a,b</sup>.

Affiliations: <sup>a</sup>The George Institute for Global Health, Sydney, Australia, <sup>b</sup>The University of Sydney, Sydney, Australia, <sup>c</sup>Deakin University Melbourne, Australia, <sup>d</sup>New South Wales Health, Sydney, Australia, <sup>e</sup>The University of Wollongong, Wollongong, Australia.

TABLES: 3

FIGURES: 1

SUPPLEMENTARY: 0

WORD COUNT: 2907

KEY WORDS: Salt, sodium, 24-hour urine, cardiovascular disease prevention

### Article Focus

The Global Monitoring Framework for the Prevention and Control of NCDs has set a salt reduction target of 30% by 2025. The assessment of population salt intake underpins the implementation of salt reduction policies and ~~enables evaluates evaluation of~~ progress. The gold standard method for assessing population salt intake is the collection of a 24-hour urine specimen ~~from a random population sample~~. However, because of the high ~~participant~~ burden, ~~participation-response~~ rates are generally low and the cost is often high. Hence there is great interest in alternative, yet robust and affordable methods to assess salt intake.

### Key Messages

The observation that an opportunistically recruited volunteer population sample ~~appears to~~ ~~may~~ provide a reasonable estimate of salt intake is important because this could substantially reduce the cost of future monitoring efforts. If ~~this-our~~ finding was repeated in other settings ~~and larger populations~~ this would ~~have-be~~ ~~of~~ global ~~implicationsimportance~~, ~~as-because~~ the ~~regular~~ reporting of salt intake ~~in 2015, 2020 and 2025~~ is encouraged as part of the Global Monitoring Framework for the Prevention and Control of NCDs.

### Strengths and Limitations

The 'Gold Standard' 24-hour urine method was used to estimate sodium intake ~~but the sample size was small and the-~~ ~~The~~ response rate for the random sample was low ~~and the study location was a single town but the response rate and estimated level of salt excretion is not substantively different from that reported in a number of diverse population groups throughout the country.~~ ~~The study raises an interesting hypothesis but requires confirmation in other studies.-~~

## Abstract

**Introduction:** The gold standard method for measuring population sodium intake is based on a 24-hour urine collection done in a random population sample. However, because participant burden is high, response rates are typically low with less than one in four agreeing to provide specimens. At this low level of response it is possible that simply asking for volunteers would produce equally valid results.

**Method:** We randomly selected 2152 adults from Lithgow, New South Wales and obtained usable 24-hour urine samples from 306 (response rate 16%). Specimens were also collected from a further 113 volunteers. Estimated salt consumption and the costs for each strategy were compared.

**Results:** The characteristics of the 'random' and 'volunteer' samples were moderately different in mean age 58 (standard deviation 14.6) vs. 49(17.7) years respectively;  $p < 0.001$ ) as well as self-reported alcohol use, tobacco use, history of hypertension and prescription drug use (all  $p < 0.04$ ). Overall crude mean 24-hour urinary salt excretion was 8.9(3.6)(g/d) in the random sample vs. 8.5(3.3)g/d for the volunteers ( $p = 0.42$ ). Corresponding age- and sex-adjusted estimates were 9.2(3.3)g/d and 8.8(3.4)g/d ( $p = 0.29$ ). Estimates for men 10.3(3.8) vs. 9.6(3.3)g/d;  $p = 0.26$ ) and women 7.6(3.0) vs. 7.9(3.2)g/d;  $p = 0.43$ ) were also similar for the two samples, as was salt excretion across age groups ( $p = 0.72$ ). The cost of obtaining each 24-hour urine sample was two times greater for the random compared to volunteer samples (A\$62 vs. A\$31).

**Conclusion:** The estimated salt consumption derived from the two samples was comparable and was not substantively different to estimates obtained from other surveys. In countries where salt is pervasive and cannot easily be avoided, estimates of consumption obtained from volunteer samples may be valid and less costly.

## Background

Non-communicable diseases (NCDs) are the leading cause of death accounting for an estimated 35 million (66%) of the 53 million deaths at all ages that occurred in 2010.[1]

Raised blood pressure is the leading risk factor for global disease burden, and is estimated to cause 9.4 million deaths every year—more than half of the estimated 17 million deaths a year caused by cardiovascular disease.[2] Much evidence shows that a reduction in salt intake lowers blood pressure and there is a high likelihood that this would reduce the risk of cardiovascular disease.[3] While there is not a current definitive estimate of population dietary salt intake in Australia, it is widely accepted that average consumption is between 7 and 12g/d[4] far above the suggested dietary target for Australians of 4g/d.[5]

The reduction of salt intake and sodium content of food has been ~~strongly~~ recommended as a cost effective action that should be undertaken immediately, with expected accelerated results in terms of lives saved, cases of disease prevented and costs avoided.[6] This position has since been ~~historically~~ endorsed by the 2011 Political Declaration of the United Nations High Level Meeting on NCDs[7] which led to the development and adoption of the Global Monitoring Framework and Voluntary Global Targets for the Prevention and Control of NCDs in which salt reduction is a core target.[8]

Measurement of population salt consumption is fundamental for planning and monitoring salt reduction policies and the gold standard method is based upon a 24-hour urine collection from a random community sample. Surveys of this type are, however, complex and expensive and because participant burden is high, randomly selected community samples typically have low response rates.[9-11] This has been noted as a significant

1 concern at recent WHO NCD surveillance, monitoring and evaluation consultation  
2 meetings in which several member states have expressed doubts about the feasibility of  
3 using this method.[12] The potential adverse impact that a low response rate might have on  
4 the conclusions drawn was highlighted and the need for further research into practicable  
5 methods for defining and monitoring population salt consumption was underlined.[12]  
6  
7  
8  
9  
10

11  
12  
13  
14 The objective of the present study was to measure sodium excretion using assays of 24-  
15 hour urine samples collected from a regional Australian population. A key question about  
16 practicality was addressed by using both a standard random sampling approach to make the  
17 estimate while simultaneously recruiting an opportunistic (volunteer) sample to make an  
18 alternate estimate. The study also examined the costs associated with each strategy.  
19  
20  
21  
22  
23  
24

## 25 26 27 **Methods**

28  
29  
30 The data derived from a random sample and a convenience sample (volunteers) done  
31 concurrently in Lithgow, New South Wales, Australia between March and June 2011.  
32 Permission to undertake the study was obtained from the Lithgow City Council and the  
33 project was approved by the University of Sydney Human Research Ethics Committee.  
34  
35  
36  
37  
38  
39  
40

## 41 42 **Inclusion and exclusion criteria**

43  
44 Consenting individuals aged 20 years or above who were resident in Lithgow and listed on  
45 the 2009 Federal electoral roll were eligible for inclusion. There was no exclusion based on  
46 inter-current illness, use of medications or any other aspect of demography or personal  
47 history.  
48  
49  
50  
51  
52  
53  
54

## 55 56 **Selection and recruitment process**

1  
2  
3  
4  
5  
6  
7  
8  
9  
10  
11  
12  
13  
14  
15  
16  
17  
18  
19  
20  
21  
22  
23  
24  
25  
26  
27  
28  
29  
30  
31  
32  
33  
34  
35  
36  
37  
38  
39  
40  
41  
42  
43  
44  
45  
46  
47  
48  
49  
50  
51  
52  
53  
54  
55  
56  
57  
58  
59  
60

*Random sampling* was done by selecting individuals at random from the electoral roll. The electoral roll provided the name and address of each potential participant with electronic databases searched to identify corresponding telephone numbers. Based on the assumption that approximately 25% of invited individuals would participate, 2152 individuals were selected to reach the desired sample size.

Potential participants were first mailed invitations to take part in the survey, with an explanation of the purpose of the study, a participant information sheet and a consent form provided. These individuals were then contacted by telephone to determine their willingness to participate and to schedule an interview time. Where a telephone number could not be obtained, the home address was visited by a member of the research team and willingness to participate was discussed face-to-face.

*Volunteer sampling* was done by offering participation in the study to individuals at two local shopping centres over several weeks. An information booth was established where those interested could seek further information about participation and arrange a visit by a member of the study team. Recruitment was completed at the time of the inquiry made to the study staff member manning the information booth.

### **Data collection process**

Data collection for randomly selected individuals and the volunteer sample was identical and commenced with a visit to the study participant by a trained research assistant. Once consent was obtained the three components of data collection, comprising a questionnaire, a physical examination and a 24-hour urine collection were initiated. The questionnaire and



1  
2  
3  
4  
5  
6  
7  
8  
9  
10  
11  
12  
13  
14  
15  
16  
17  
18  
19  
20  
21  
22  
23  
24  
25  
26  
27  
28  
29  
30  
31  
32  
33  
34  
35  
36  
37  
38  
39  
40  
41  
42  
43  
44  
45  
46  
47  
48  
49  
50  
51  
52  
53  
54  
55  
56  
57  
58  
59  
60

physical examination were completed at the time of the visit and the urine collection was scheduled to be done within the following three days.

The *questionnaire* was fully structured and administered by research assistants, with all responses based on self-report. The questionnaire recorded information on socio-demographic variables, vascular disease history and current drug treatments. Participants were asked to provide the names of regular medications but if that was not known the purpose of the medication was recorded (for example, anti-hypertensive medication).

*The physical examination* comprised measurement of body weight (using calibrated Tania HD-357 portable electronic scales (USA) and height (using a calibrated portable stadiometer Wedderburn WS-HRP model (Australia)) to the nearest 0.1kg and 0.1cm respectively, with body mass index (kg/height(m<sup>2</sup>)) then calculated. Blood pressure was measured using a manual inflation blood pressure monitor (A&D UA-&704) in triplicate, according to the American Heart Association protocol.[13]

*A single 24-hour urine collection* was obtained with the first voided urine upon waking on the day of collection being discarded and participants then collecting all voided urine up to and including the first void the following morning. The time at the beginning and the end of urine collection were recorded. The urine volume was noted and the urinary sodium concentration in an aliquot was measured by ion-selective electrode with the buffered kinetic Jaffe reaction without deproteinisation used for assay of urine creatinine (Cobas Integra 400). Suspected inaccurate urine collections (i.e. urinary creatinine < 4.0 mmol/day for women, or < 6.0mmol/day for men, or a 24-hour urine collection of < 500ml for either sex) and extreme outliers for urinary creatinine (i.e. > 3 standard deviations from the mean)

1 were excluded. The rates of exclusion were similar for the random and volunteer samples.  
2 For each individual, the 24-hour sodium excretion value (mmol/day) was calculated as the  
3 concentration of sodium in the urine (mmol/L) multiplied by the urinary volume (L/day).  
4 The conversion from mmol to grams was made by dividing by 17 and the conversion from  
5 sodium (Na) to salt (NaCl) by multiplying by 2.542.  
6  
7  
8  
9  
10

### 11 **Cost data**

12 The pre-interview costs involved staff time in selecting and attempting to reach subjects  
13 including accessing the electoral roll, sending participant invitations, follow-up phone calls  
14 and door-knocking to schedule interviews with those randomly selected, as well as setting  
15 up and manning an information booth to engage the volunteer sample. The post-interview  
16 costs comprised primarily of pathology expenses and were the same for each sample.  
17  
18  
19  
20  
21  
22  
23  
24  
25  
26  
27

### 28 **Statistical analyses**

29 The baseline characteristics of the sample selected at random and the volunteer sample  
30 were summarized and compared using t-tests and Chi-square tests as were their average  
31 urinary sodium values. In addition to the crude estimates described above, weighted  
32 estimates of overall population mean sodium excretion were also made in an effort to  
33 account for the non-random sampling of individuals. This was done for both the randomly  
34 selected group (to adjust for the poor response rate) and for the volunteer group (to adjust  
35 for their non-representative age and sex structure) by calculating age- and sex-specific  
36 estimates of salt excretion for 20 year age bands (20-39, 40-59, and 60 plus) for men and  
37 women and then weighting these by the age and sex structure of the population to obtain an  
38 overall estimate for the community. Regression models were fitted to explore the  
39 association between baseline participant characteristics and a range of covariates in the  
40  
41  
42  
43  
44  
45  
46  
47  
48  
49  
50  
51  
52  
53  
54  
55  
56  
57  
58  
59  
60

combined (random plus volunteer) sample. Throughout, a p-value of 0.05 or less was taken to indicate a finding unlikely to have arisen solely by chance. Statistical analyses were conducted using SPSS for Windows (Version 21, SPSS Inc, Chicago, IL) and STATA for windows (StataCorp. 2009 *Strata Statistical Software: Release 11*. College Station, TX: StataCorp LP).

## Results

Of 2,152 individuals selected by random sampling of the electoral roll, 853 (40%) were uncontactable after multiple attempts, 126 (5.8%) were ineligible because they had moved out of the study area, 5 (0.2%) had died and 843 (39%) declined to participate. The remaining 329 individuals comprise the 'random' sample with a response rate of 16%. The volunteer sample comprised 120 individuals recruited consecutively at a shopping mall over a seven day period. The characteristics of the random and volunteer samples were moderately different in a number of regards, including age, proportion using tobacco~~-use~~, alcohol use-, self-reported hypertension and use of any prescription medication (Table 1).

### Crude and weighted 24-hour urinary salt excretion in random and volunteer samples

For the analysis there were 306 individuals in the random sample and 113 in the volunteer group with 20 excluded because of suspected incomplete urine collections and 10 for other reasons (Figure 1). The crude mean 24-hour urinary salt excretion was 8.9 (standard deviation 3.6) g/d in the random sample and 8.5 (3.3) g/d in the volunteer group (p=0.42). The corresponding weighted estimates for the Lithgow population were 9.2 (3.9) g/d and 8.8 (3.4) g/d respectively (p=0.29).

1  
2  
3  
4  
5  
6  
7  
8  
9  
10  
11  
12  
13  
14  
15  
16  
17  
18  
19  
20  
21  
22  
23  
24  
25  
26  
27  
28  
29  
30  
31  
32  
33  
34  
35  
36  
37  
38  
39  
40  
41  
42  
43  
44  
45  
46  
47  
48  
49  
50  
51  
52  
53  
54  
55  
56  
57  
58  
59  
60

The proportion of randomly sampled individuals exceeding the 6 g/d recommended Maximum Level for Australians was 79%, the proportion exceeding the Australian Suggested Dietary Target of 4 g/d was 94% and the proportion exceeding the WHO Maximum Recommended Level of 5 g/d was 87%. The corresponding proportions for the volunteer group were 75%, 93% and 84%. Population-weighted estimates of these proportions were not substantively different.

### **24-hour urinary salt excretion in participant subgroups**

Urinary salt excretion in both population samples was significantly higher in men compared to women 10.3 (3.8) g/d vs. 7.6 (3.0) g/d;  $p < 0.001$  for random sample and 9.6 (3.3) g/d vs. 7.9 (3.2) g/d;  $p = 0.006$  for the volunteer sample (Table 2) and this was also true for every age group. There was an inverse association between daily salt excretion and age (Table 2) such that for every decade increase in age there was 0.3g/d less excretion of salt ( $p = 0.007$ ). The association between salt excretion and BMI was positive with every unit rise in BMI associated with a 0.16g/d greater excretion of salt ( $p < 0.001$ ). Similar patterns were observed in both the random and volunteer population samples. There were no other significant associations observed between salt excretion levels and recorded participant characteristics including education, health status, tobacco use, alcohol use, blood pressure, disease history or prescription drug use (all  $p > 0.05$ ).

### **Costs associated with random and volunteer survey methods**

The two main costs associated with doing the study were staff salaries and pathology expenses. Due primarily to the increased staff time required for the selection and interaction with the randomly selected individuals the estimated average cost associated with obtaining a valid 24-hour urine sample was greater for each participant in the random

sample (about AUD\$ 62) compared to each participant in the volunteer sample (about AUD\$ 31).

## Discussion

In this population salt intake greatly exceeds ~~the~~ recommended levels, reaffirming the urgent need for concerted action to address salt consumption in Australia. Mean salt excretion levels were some 50% higher than maximum recommended ~~levels~~[5, 14] and only about one in every twenty individuals was found to be consuming the level of salt recommended for good health. Even these data are likely to be an under-estimate of the problem because the approximate 10% of salt excreted by the gastro-intestinal system and the skin will have gone unrecorded.[15] [An association between blood pressure and salt intake was not observed in this study but this is unsurprising - the substantial day-to-day variability in blood pressure levels and sodium excretion mitigates against the detection of this association and only a much larger study or a study with multiple measures of blood pressure and urinary sodium excretion would have been able to reliably explore this question.](#) The level of excess salt consumption indicated by this survey would be anticipated to cause substantial disease burden in Australia leading both to large numbers of lives lost prematurely and to many individuals suffering significant disability.[16] With centrally ~~implemented~~-managed salt reduction programs projected to deliver large population health gains at very low cost [17-19], the implementation of an effective salt reduction program should be a priority for the government of Australia.[20, 21]

The observation that the volunteer sample produced similar findings to the random sample is potentially important because it was much easier and less costly to collect data from the

1  
2  
3  
4  
5  
6  
7  
8  
9  
10  
11  
12  
13  
14  
15  
16  
17  
18  
19  
20  
21  
22  
23  
24  
25  
26  
27  
28  
29  
30  
31  
32  
33  
34  
35  
36  
37  
38  
39  
40  
41  
42  
43  
44  
45  
46  
47  
48  
49  
50  
51  
52  
53  
54  
55  
56  
57  
58  
59  
60

volunteer sample than from the random sample. There are several reasons why a volunteer sample might provide a similar result to a random sample when estimating population salt consumption from 24-hour urine samples. First, the response rate in a random sample from whom a 24-hour urine sample is sought is typically very low, averaging 20% (range 9.7% to 26.8%) in a series of recently reported studies.[9-11, 20] In this situation the random sample effectively becomes a volunteer sample and any biases consequent upon using a volunteer sample might also be apparent in the ‘random’ sample. That said, there were many differences between the characteristics of the random and volunteer samples included in this study but these did not translate into detectable differences in the observed sodium excretion. Another possible explanation therefore is the ubiquitous nature of salt in the food supply[22] and the rather limited capacity of even motivated individuals to meaningfully modify their salt consumption,[23] thereby minimizing the impact of any ‘healthy volunteer ’ effect.[24] It is also possible, of course, that both samples in our study were equally biased and neither gave a robust estimate of true population intake. While this may be true it is of note that the estimates obtained from the present study are not substantially different from prior studies in Australia [25-37] or other countries with broadly similar dietary patterns[38, 39].

In some countries it may be possible to achieve better response rates[40, 41] and in others it may be that specific dietary practices or other cultural factors will mean that a volunteer sample will not give a good measure of true population salt intake. If, however, the findings reported here are observed elsewhere, volunteer sampling might provide a low-cost alternate to traditional random sampling techniques. At the very least it may be possible to use a volunteer sample to demonstrate the need for action - most countries in the world are likely to have salt consumption levels far above the WHO consumption target of

1 <5g/d, and the likelihood that the selection of a volunteer sample will lead to an under-  
2 recording of salt consumption of a very large magnitude is probably fairly small.  
3  
4  
5

6  
7 In addition to the baseline assessment required to justify the commencement of a salt  
8 reduction strategy, ongoing monitoring of salt consumption is required to objectively  
9 determine program efficacy. If the resources required to conduct high quality surveys of a  
10 random population sample can be acquired then this remains the optimal approach both to  
11 baseline evaluation and monitoring of progress. If not, then repeat surveys of volunteers  
12 are likely to be of value if the methods used for participant selection are identical on each  
13 occasion – if the biases are the same on each measurement occasion then any real rise or  
14 fall in salt consumption should be clearly apparent.  
15  
16  
17  
18  
19  
20  
21  
22  
23  
24  
25  
26  
27

28 The cost estimates made for this study showed that recruiting the volunteer sample was a  
29 significantly less expensive exercise than recruiting the random population sample. The  
30 primary reason for this was the much reduced fieldwork time required for the per capita  
31 recruitment of the volunteer sample. Pathology and other recorded costs were otherwise  
32 approximately the same. Expenses that were not specifically determined were the costs of  
33 computer hardware, computer software, the training of the field staff, and the time required  
34 for supervision by the project manager. The last two of these are also likely to have been  
35 lower for the volunteer sample due to the simplified and more rapid recruitment process  
36 and, as a consequence, the reported difference between costs is likely to have been under-,  
37 rather than over-estimated.  
38  
39  
40  
41  
42  
43  
44  
45  
46  
47  
48  
49  
50  
51  
52  
53

#### 54 **Strengths and limitations**

55  
56  
57  
58  
59  
60

1  
2  
3  
4  
5  
6  
7  
8  
9  
10  
11  
12  
13  
14  
15  
16  
17  
18  
19  
20  
21  
22  
23  
24  
25  
26  
27  
28  
29  
30  
31  
32  
33  
34  
35  
36  
37  
38  
39  
40  
41  
42  
43  
44  
45  
46  
47  
48  
49  
50  
51  
52  
53  
54  
55  
56  
57  
58  
59  
60

The 'Gold Standard' 24-hour urine method was used to measure salt intake with standard checks for completeness of the specimens based upon urine volume and urine creatinine excretion. The response rate for the random sample was low but comparable to other studies done in similar settings over recent years.[9-11] The sample size was relatively small and results for subgroups are somewhat imprecise as a consequence. It is possible, for this same reason, that the study may have failed to identify small, but real, differences between the sodium excretion levels determined by the two different population sampling methods. The location of the study in a single town in a regional area of New South Wales compromises the direct generalizability of the study findings to Australia as a whole, although the estimated level of salt excretion is not substantively different from that reported in a number of diverse population groups throughout the country.[25-37]

## Conclusion

These data affirm that current efforts to reduce salt intake in Australia are failing, with a large majority of the population studied consuming more than the recommended Australian Upper Limit of 6g/d and almost everyone eating more than the Suggested Dietary Target of 4g/day. The observation that an opportunistically recruited volunteer population sample ~~appears may to~~ provide a reasonable estimate of salt intake is ~~important-worthy of further~~ research because this could substantially reduce the cost of future monitoring efforts. If this finding was repeated in other settings this would have global implications because sodium reduction has been proposed to all member states by the WHO. Most countries, however, have very limited resources available and any reduction in program cost that can be achieved without seriously adversely affecting program quality will be an important step forward. ~~With population-based salt reduction strategies already shown to be cost-effective~~



~~or cost saving in most settings, these new data further support the feasibility of widespread rollout of national salt reduction efforts around the world.~~

1  
2  
3  
4  
5  
6  
7  
8  
9  
10  
11  
12  
13  
14  
15  
16  
17  
18  
19  
20  
21  
22  
23  
24  
25  
26  
27  
28  
29  
30  
31  
32  
33  
34  
35  
36  
37  
38  
39  
40  
41  
42  
43  
44  
45  
46  
47  
48  
49  
50  
51  
52  
53  
54  
55  
56  
57  
58  
59  
60

For peer review only

**TABLE 1. CHARACTERISTICS OF RANDOM AND VOLUNTEER SAMPLES**

|                                                             | Random sample<br>(n=306) | Volunteer sample<br>(n=113) | p-value |
|-------------------------------------------------------------|--------------------------|-----------------------------|---------|
| Female (%)                                                  | 52.9                     | 61.9                        | 0.10    |
| Age, years (mean)                                           | 57.6                     | 49.3                        | <0.001  |
| Height, cm (mean)                                           | 167.5                    | 167.6                       | 0.85    |
| Weight, kg (mean)                                           | 81.8                     | 83.9                        | 0.30    |
| BMI, kg/m <sup>2</sup> (mean)                               | 29.1                     | 29.8                        | 0.27    |
| Systolic bp, mmHg (mean)                                    | 126.7                    | 123.7                       | 0.16    |
| Diastolic bp, mmHg (mean)                                   | 78.7                     | 78.9                        | 0.88    |
| Education                                                   |                          |                             | 0.22    |
| -Secondary (%)                                              | 63.7                     | 55.8                        |         |
| -Tertiary (%)                                               | 25.5                     | 32.7                        |         |
| -Postgraduate (%)                                           | 10.8                     | 11.5                        |         |
| Health Status                                               |                          |                             | 0.21    |
| -Very good (%)                                              | 50.3                     | 48.7                        |         |
| -Good (%)                                                   | 29.4                     | 23.9                        |         |
| -Fair (%)                                                   | 20.2                     | 27.4                        |         |
| Current smoker (> 1 / day) (%)                              | 8.2                      | 22.1                        | <0.001  |
| Ever smoked (> 1 / day) (%)                                 | 41.2                     | 53.1                        | 0.03    |
| Alcoholic consumption (time since last consumption)         |                          |                             | 0.04    |
| One week or less (%)                                        | 62.1                     | 42.5                        |         |
| > one week < 12months (%)                                   | 19.9                     | 34.5                        |         |
| 12 months or more (%)                                       | 11.1                     | 10.6                        |         |
| Never (%)                                                   | 6.9                      | 12.4                        |         |
| Have you ever been told by a doctor or nurse that you have: |                          |                             |         |
| -high blood pressure (%)                                    | 44.1                     | 30.1                        | 0.03    |
| -low blood pressure (%)                                     | 15.4                     | 14.2                        | 0.76    |
| -high cholesterol (%)                                       | 37.3                     | 30.0                        | 0.16    |
| -heart attack (%)                                           | 8.2                      | 3.5                         | 0.10    |
| -stroke (%)                                                 | 3.9                      | 1.8                         | 0.37    |
| -angina (%)                                                 | 6.9                      | 4.4                         | 0.36    |
| -diabetes (%)                                               | 11.1                     | 7.1                         | 0.26    |
| Prescription Medication Use*                                |                          |                             |         |
| Antihypertensive (%)                                        | 15.4                     | 15.0                        | 0.54    |
| Lipid lowering (%)                                          | 11.1                     | 7.1                         | 0.62    |
| Aspirin (%)                                                 | 8.8                      | 2.7                         | 0.06    |
| Glucose lowering (%)                                        | 22.5                     | 7.1                         | 0.17    |
| Any prescription medication (%)                             | 73.9                     | 59.2                        | 0.02    |

\*Participants could be taking more than one prescribed medication

TABLE 2. URINARY SALT EXCRETION (GRAMS/DAY)

|                                                      | Random sample<br>(n=306) |              | Volunteer<br>sample<br>(n=113) |              | P value     |
|------------------------------------------------------|--------------------------|--------------|--------------------------------|--------------|-------------|
|                                                      | Mean                     | (SD)         | Mean                           | (SD)         |             |
| <b>Overall crude</b>                                 | <b>8.9</b>               | <b>(3.6)</b> | <b>8.5</b>                     | <b>(3.3)</b> | <b>0.42</b> |
| <b>Overall weighted*</b>                             | <b>9.2</b>               | <b>(3.9)</b> | <b>8.8</b>                     | <b>(3.4)</b> | <b>0.29</b> |
| Female                                               |                          |              |                                |              | 0.27        |
| 20-39                                                | 8.7                      | (4)          | 7.9                            | (2.9)        |             |
| 40-59                                                | 8                        | (3.1)        | 7.8                            | (3.8)        |             |
| 60+                                                  | 6.8                      | (2.4)        | 7.9                            | (2.6)        |             |
| All female                                           | 7.6                      | (3)          | 7.9                            | (3.2)        |             |
| Male                                                 |                          |              |                                |              | 0.40        |
| 20-39                                                | 10.8                     | (4.7)        | 10.5                           | (3.9)        |             |
| 40-59                                                | 11.1                     | (4.2)        | 9.8                            | (3.0)        |             |
| 60+                                                  | 9.7                      | (3.1)        | 8.6                            | (3.0)        |             |
| All male                                             | 10.3                     | (3.8)        | 9.6                            | (3.3)        |             |
| Education                                            |                          |              |                                |              | 0.25        |
| Secondary                                            | 9.1                      | (3.7)        | 8.9                            | (3.4)        |             |
| Tertiary                                             | 8.3                      | (3.0)        | 8.5                            | (3.3)        |             |
| Post graduate                                        | 8.4                      | (3.6)        | 8                              | (3.3)        |             |
| Health Status                                        |                          |              |                                |              | 0.89        |
| Very Good                                            | 8.7                      | (3.8)        | 8                              | (2.9)        |             |
| Good                                                 | 8.8                      | (3.5)        | 9.3                            | (3.7)        |             |
| Fair                                                 | 8.7                      | (2.8)        | 8.3                            | (2.6)        |             |
| Current Smoker                                       | 9                        | (3.8)        | 8.8                            | (3.4)        | 0.82        |
| Ever Smoked                                          | 8.8                      | (3.6)        | 9                              | (3.6)        | 0.74        |
| Alcohol Consumption<br>(time since last consumption) |                          |              |                                |              | 0.45        |
| One week or less                                     | 8.8                      | (3.8)        | 8.7                            | (3.8)        |             |
| > one week < 12months                                | 8.6                      | (3.2)        | 8.7                            | (2.9)        |             |
| 12 months or more                                    | 9.3                      | (3.8)        | 7.8                            | (2.8)        |             |
| Never                                                | 9.1                      | (3.2)        | 8.1                            | (3.6)        |             |

\*Adjusted for response rate (random sample) and non-random selection (volunteer sample) by weighting age-and sex-specific estimates to the age and sex structure of the Lithgow population

**TABLE 3. COST OF RANDOM COMPARED TO VOLUNTEER SAMPLING (AUD)**

|                              | <b>Random<br/>Sample(n=306)</b> | <b>Volunteer<br/>Sample(n=113)</b> |
|------------------------------|---------------------------------|------------------------------------|
| Pre-interview costs          |                                 |                                    |
| Sampling from electoral roll | \$2,152                         | 0                                  |
| Scheduling interviews        | \$8,704                         | \$1,088                            |
| Post-interview costs         |                                 |                                    |
| Pathology costs              | \$4,211                         | \$1,584                            |
| Other costs                  |                                 |                                    |
| Postage                      | \$2,169                         | 0                                  |
| Telephone                    | \$1,870                         | \$818                              |
| Shopping centre stand fee    |                                 | \$10                               |
| <b>TOTAL</b>                 | <b>\$19,106</b>                 | <b>\$3,500</b>                     |
| <b>COST PER PARTICIPANT*</b> | <b>\$62.44</b>                  | <b>\$30.96</b>                     |

\*Cost per participant calculated by dividing total cost by the number of valid participants in each sample.

FIGURE 1. RECRUITMENT OF STUDY SAMPLES

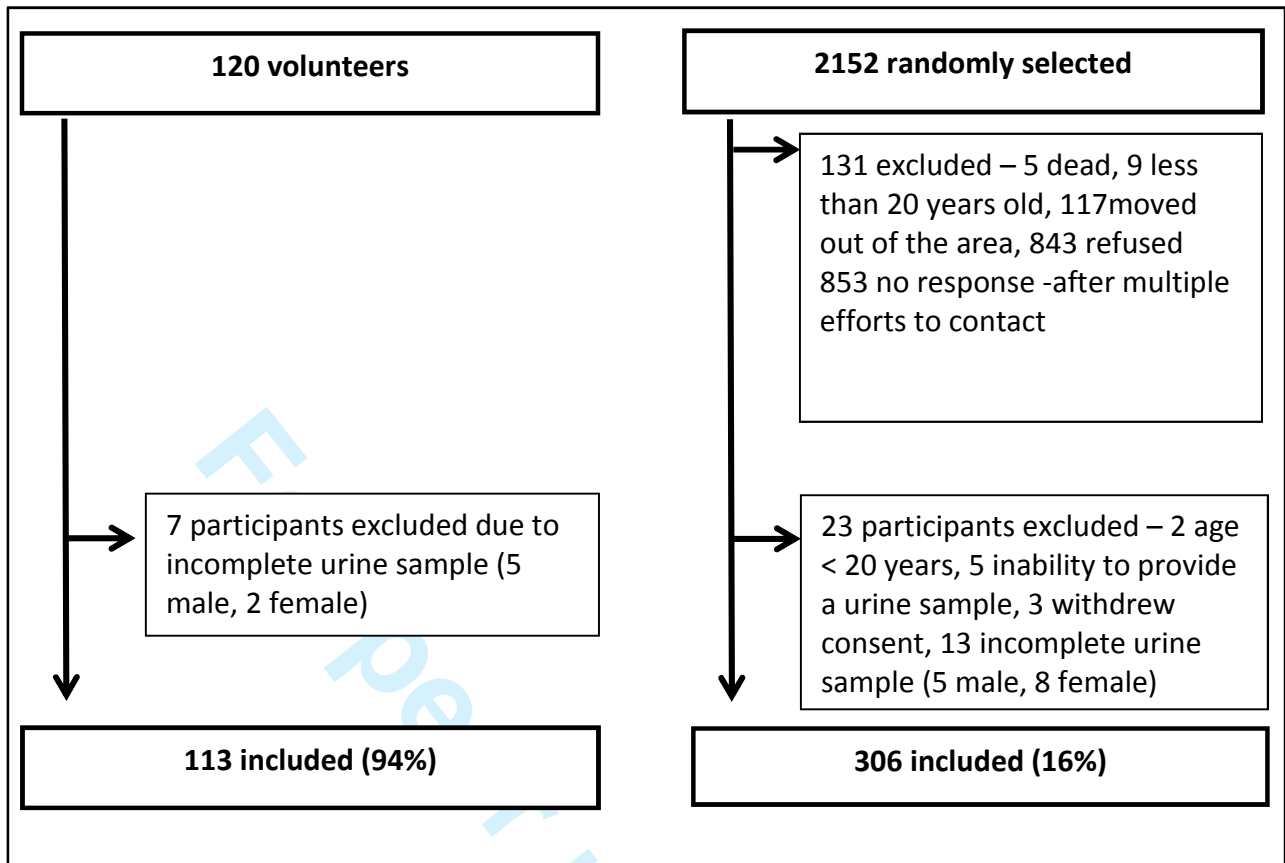

1  
2  
3  
4  
5  
6  
7  
8  
9  
10  
11  
12  
13  
14  
15  
16  
17  
18  
19  
20  
21  
22  
23  
24  
25  
26  
27  
28  
29  
30  
31  
32  
33  
34  
35  
36  
37  
38  
39  
40  
41  
42  
43  
44  
45  
46  
47  
48  
49  
50  
51  
52  
53  
54  
55  
56  
57  
58  
59  
60

## Acknowledgments

The authors thank Lithgow City Council, the Nepean Blue Mountains Local Area Health Network for their support and most importantly all of the participants for their support and interest in the study.

## Sources of support

This work was supported by a National Health and Medical Research Council (NHMRC) of Australia partnership project (Neal #13372) which includes The George Institute for Global Health in partnership with the Australian Division of World Action on Salt and Health; the Australian Food and Grocery Council; the New South Wales Food Authority; and New South Wales Health. Bruce Neal was supported by an Australian Research Council Future Fellowship, Mark Woodward by a NHMRC Fellowship and Jacqui Webster by a National Heart Foundation and Stroke Foundation postdoctoral research fellowship.

## Conflicts of interest

J.W. is the co-ordinator, and B.N. is the Chairman of the Australian Division of World Action on Salt and Health.

## References

1. Lozano, R., et al., *Global and regional mortality from 235 causes of death for 20 age groups in 1990 and 2010: a systematic analysis for the Global Burden of Disease Study 2010*. Lancet, 2012. **380**(9859): p. 2095-128.
2. Lim, S.S., et al., *A comparative risk assessment of burden of disease and injury attributable to 67 risk factors and risk factor clusters in 21 regions, 1990-2010: a systematic analysis for the Global Burden of Disease Study 2010*. Lancet, 2012. **380**(9859): p. 2224-60.
3. He, F.J., N.R. Campbell, and G.A. MacGregor, *Reducing salt intake to prevent hypertension and cardiovascular disease*. Rev Panam Salud Publica, 2012. **32**(4): p. 293-300.
4. Keogh, J.B. and P.M. Clifton, *Salt intake and health in the Australian population*. Med J Aust, 2008. **189**(9): p. 526.
5. National Health and Medical Research Council, *Nutrient Reference Values for Australia and New Zealand*, 2006, Department of Health and Ageing.
6. The World Health Organization, *2008-2013 Action Plan for the Global Strategy for the Prevention and Control of Noncommunicable Diseases*, 2008.
7. United Nations. *2011 High Level Meeting on Prevention and Control of Non-communicable Diseases*. 2011. Available from: <http://www.un.org/en/ga/ncdmeeting2011/>.
8. The World Health Organization, *Formal meeting of Member States to conclude the work on the comprehensive global monitoring framework, including indicators, and a set of voluntary global targets for the prevention and control of noncommunicable diseases Geneva, 5–7 November 2012*, 2012: Geneva.
9. Ribic, C.H., et al., *Salt intake of the Slovene population assessed by 24 h urinary sodium excretion*. Public Health Nutr, 2010. **13**(11): p. 1803-9.

10. Chappuis, A., et al., *Swiss survey on salt intake: main results*. 2011.
11. Ortega, R.M., et al., *Estimation of salt intake by 24 h urinary sodium excretion in a representative sample of Spanish adults*. *Br J Nutr*, 2011. **105**(5): p. 787-94.
12. The World Health Organization, *European Regional Technical Consultation on Noncommunicable Disease Surveillance, Monitoring and Evaluation*. 2012.
13. Perloff, D., et al., *Human blood pressure determination by sphygmomanometry*. *Circulation*, 1993. **88**(5 Pt 1): p. 2460-70.
14. The World Health Organization, *Reducing Salt Intake in Populations*, in *Report of a WHO Forum and Technical Meeting 2007*, World Health Organisation: Geneva.
15. Kirkendall, A.M., et al., *The effect of dietary sodium chloride on blood pressure, body fluids, electrolytes, renal function, and serum lipids of normotensive man*. *J Lab Clin Med*, 1976. **87**(3): p. 411-34.
16. Cobiac, L.J., et al., *Which interventions offer best value for money in primary prevention of cardiovascular disease?* *PLoS One*, 2012. **7**(7): p. e41842.
17. Beaglehole, R., et al., *UN High-Level Meeting on Non-Communicable Diseases: addressing four questions*. *Lancet*, 2011. **378**(9789): p. 449-55.
18. National Heart Foundation of Australia, *Summary of evidence statement on the relationships between dietary electrolytes and cardiovascular disease*.  
<http://www.heartfoundation.org.au/SiteCollectionDocuments/Dietary-Electrolytes-CVD-Summary-Evidence.pdf>, 2006.
19. Cook, N.R., et al., *Long term effects of dietary sodium reduction on cardiovascular disease outcomes: observational follow-up of the trials of hypertension prevention (TOHP)*. *BMJ*, 2007. **334**(7599): p. 885-8.



- 1  
2  
3 20. Brown, I.J., et al., *Salt intakes around the world: implications for public health*. Int J  
4  
5 Epidemiol, 2009. **38**(3): p. 791-813.
- 6  
7  
8 21. Bibbins-Domingo, K., et al., *Projected Effect of Dietary Salt Reductions on Future*  
9  
10 *Cardiovascular Disease*. N Engl J Med, 2010: p. NEJMoa0907355.
- 11  
12  
13 22. Webster, J.L., E.K. Dunford, and B.C. Neal, *A systematic survey of the sodium contents of*  
14  
15 *processed foods*. Am J Clin Nutr, 2010. **91**(2): p. 413-20.
- 16  
17  
18 23. Kumanyika, S., *Behavioral aspects of intervention strategies to reduce dietary sodium*.  
19  
20 Hypertension, 1991. **17**(1 Suppl): p. I190-5.
- 21  
22  
23 24. Lindsted, K.D., et al., *Healthy volunteer effect in a cohort study: temporal resolution in the*  
24  
25 *Adventist Health Study*. J Clin Epidemiol, 1996. **49**(7): p. 783-90.
- 26  
27  
28 25. Beard, T.C., et al., *The Hobart Salt Study 1995: few meet national sodium intake target*.  
29  
30 Med J Aust, 1997. **166**(8): p. 404-7.
- 31  
32  
33 26. Jones, G., et al., *A population-based study of the relationship between salt intake, bone*  
34  
35 *resorption and bone mass*. Eur J Clin Nutr, 1997. **51**(8): p. 561-5.
- 36  
37  
38 27. Bao, D.Q., et al., *Effects of dietary fish and weight reduction on ambulatory blood pressure*  
39  
40 *in overweight hypertensives*. Hypertension, 1998. **32**(4): p. 710-7.
- 41  
42  
43 28. Mori, Y., et al., *Effect of highly purified eicosapentaenoic acid ethyl ester on insulin*  
44  
45 *resistance and hypertension in Dahl salt-sensitive rats*. Metabolism, 1999. **48**(9): p. 1089-  
46  
47 95.
- 48  
49  
50 29. Cumming, R.G., P. Mitchell, and W. Smith, *Dietary sodium intake and cataract: the Blue*  
51  
52 *Mountains Eye Study*. Am J Epidemiol, 2000. **151**(6): p. 624-6.
- 53  
54  
55 30. Nowson, C.A., T.O. Morgan, and C. Gibbons, *Decreasing dietary sodium while following a*  
56  
57 *self-selected potassium-rich diet reduces blood pressure*. J Nutr, 2003. **133**(12): p. 4118-23.

- 1  
2  
3  
4  
5  
6  
7  
8  
9  
10  
11  
12  
13  
14  
15  
16  
17  
18  
19  
20  
21  
22  
23  
24  
25  
26  
27  
28  
29  
30  
31  
32  
33  
34  
35  
36  
37  
38  
39  
40  
41  
42  
43  
44  
45  
46  
47  
48  
49  
50  
51  
52  
53  
54  
55  
56  
57  
58  
59  
60
31. Nowson, C.A., et al., *Blood pressure response to dietary modifications in free-living individuals*. J Nutr, 2004. **134**(9): p. 2322-9.
  32. Ward, N.C., et al., *Oxidative stress in human hypertension: association with antihypertensive treatment, gender, nutrition, and lifestyle*. Free Radic Biol Med, 2004. **36**(2): p. 226-32.
  33. Hodgson, J.M., et al., *Partial substitution of carbohydrate intake with protein intake from lean red meat lowers blood pressure in hypertensive persons*. Am J Clin Nutr, 2006. **83**(4): p. 780-7.
  34. Margerison, C. and C. Nowson, *Dietary intake and 24-hour excretion of sodium and potassium*. Asia Pac J Clin Nutr, 2006. **15**: p. S37.
  35. Julie Boorman, J.C., Dorothy Mackerras., *Salt Intake From Processed Food and Discretionary Use in Australia*. Food Standards Australia New Zealand, ACT Australia Available at: [http://www.foodstandards.gov.au/\\_srcfiles/Salt\\_Intake\\_5.pdf](http://www.foodstandards.gov.au/_srcfiles/Salt_Intake_5.pdf)
  36. Brinkworth, G.D., et al., *Reductions in blood pressure following energy restriction for weight loss do not rebound after re-establishment of energy balance in overweight and obese subjects*. Clin Exp Hypertens, 2008. **30**(5): p. 385-96.
  37. Charlton, K., et al., *Urinary sodium excretion, dietary sources of sodium intake and knowledge and practices around salt use in a group of healthy Australian women*. Aust N Z J Public Health, 2010. **34**(4): p. 356-63.
  38. Sadler, K., et al. *National Diet and Nutrition Survey - Assessment of Dietary Sodium in Adults (Aged 19–64 Years) in England, 2011*. . 2012; Available from:

1  
2  
3 [https://www.gov.uk/government/uploads/system/uploads/attachment\\_data/file/213420/Sodium-Survey-England-2011\\_Text\\_to-DH\\_FINAL1.pdf](https://www.gov.uk/government/uploads/system/uploads/attachment_data/file/213420/Sodium-Survey-England-2011_Text_to-DH_FINAL1.pdf).  
4  
5  
6

- 7  
8 39. He, J., et al., *Dietary sodium intake and subsequent risk of cardiovascular disease in*  
9 *overweight adults*. JAMA, 1999. **282**(21): p. 2027-34.  
10  
11 40. Tuomilehto, J., et al., *Community-based prevention of hypertension in North Karelia,*  
12 *Finland*. Ann Clin Res, 1984. **16 Suppl 43**: p. 18-27.  
13  
14 41. Staessen, J., et al., *Salt intake and blood pressure in the general population: a controlled*  
15 *intervention trial in two towns*. J Hypertens, 1988. **6**(12): p. 965-73.  
16  
17  
18  
19  
20  
21  
22  
23  
24  
25  
26  
27  
28  
29  
30  
31  
32  
33  
34  
35  
36  
37  
38  
39  
40  
41  
42  
43  
44  
45  
46  
47  
48  
49  
50  
51  
52  
53  
54  
55  
56  
57  
58  
59  
60



**SALT INTAKE ASSESSED BY 24-HOUR URINARY SODIUM  
EXCRETION IN A RANDOM AND OPPORTUNISTIC SAMPLE IN  
AUSTRALIA**

|                                 |                                                                                                                                                                                                                                                                                                                                                                                                                                                                                                                                                                                                                                                                                                                                                                                                                                                                                             |
|---------------------------------|---------------------------------------------------------------------------------------------------------------------------------------------------------------------------------------------------------------------------------------------------------------------------------------------------------------------------------------------------------------------------------------------------------------------------------------------------------------------------------------------------------------------------------------------------------------------------------------------------------------------------------------------------------------------------------------------------------------------------------------------------------------------------------------------------------------------------------------------------------------------------------------------|
| Journal:                        | <i>BMJ Open</i>                                                                                                                                                                                                                                                                                                                                                                                                                                                                                                                                                                                                                                                                                                                                                                                                                                                                             |
| Manuscript ID:                  | bmjopen-2013-003720.R2                                                                                                                                                                                                                                                                                                                                                                                                                                                                                                                                                                                                                                                                                                                                                                                                                                                                      |
| Article Type:                   | Research                                                                                                                                                                                                                                                                                                                                                                                                                                                                                                                                                                                                                                                                                                                                                                                                                                                                                    |
| Date Submitted by the Author:   | 13-Dec-2013                                                                                                                                                                                                                                                                                                                                                                                                                                                                                                                                                                                                                                                                                                                                                                                                                                                                                 |
| Complete List of Authors:       | Land, Mary-Anne; The George Institute for Global Health, ; The University of Sydney,<br>Webster, Jacqui; The George Institute for Global Health, ; The University of Sydney,<br>Christoforou, Anthea; The George Institute for Global Health, ; The University of Sydney,<br>Praveen, D; The George Institute for Global Health, ; The University of Sydney,<br>Jeffery, Paul; Deakin University,<br>Chalmers, John; The George Institute for Global Health, ; The University of Sydney,<br>Smith, Wayne; New South Wales Health,<br>Woodward, Mark; The George Institute for Global Health, ; The University of Sydney,<br>Barzi, Federica; The George Institute for Global Health, ; The University of Sydney,<br>Nowson, Caryl; Deakin University,<br>Flood, Victoria; The University of Wollongong,<br>Neal, Bruce; The George Institute for Global Health, ; The University of Sydney, |
| <b>Primary Subject Heading</b>: | Public health                                                                                                                                                                                                                                                                                                                                                                                                                                                                                                                                                                                                                                                                                                                                                                                                                                                                               |
| Secondary Subject Heading:      | Complementary medicine, Epidemiology, Global health                                                                                                                                                                                                                                                                                                                                                                                                                                                                                                                                                                                                                                                                                                                                                                                                                                         |
| Keywords:                       | Hypertension < CARDIOLOGY, NUTRITION & DIETETICS, PUBLIC HEALTH                                                                                                                                                                                                                                                                                                                                                                                                                                                                                                                                                                                                                                                                                                                                                                                                                             |
|                                 |                                                                                                                                                                                                                                                                                                                                                                                                                                                                                                                                                                                                                                                                                                                                                                                                                                                                                             |

SCHOLARONE™  
Manuscripts

1  
2  
3  
4 **SALT INTAKE ASSESSED BY 24-HOUR URINARY SODIUM EXCRETION IN A**  
5 **RANDOM AND OPPORTUNISTIC SAMPLE IN AUSTRALIA**  
6  
7

8  
9 *Corresponding Author:*

10 Miss Mary-Anne Land  
11 The George Institute for Global Health  
12 PO BOX M201 Missenden Road  
13 Camperdown, NSW, AUSTRALIA  
14 2050.  
15 T: +61 2 9993 4547  
16 E: [maland@georgeinstitute.org.au](mailto:maland@georgeinstitute.org.au)  
17  
18  
19  
20  
21  
22

23  
24 Authors: Mary-Anne LAND<sup>a,b</sup>, Jacqui, WEBSTER<sup>a,b</sup>, Anthea, CHRISTOFOROU<sup>a,b</sup>, D  
25 PRAVEEN<sup>a,b</sup>, Paul JEFFERY<sup>c</sup>, John CHALMERS<sup>a,b</sup>, Wayne SMITH<sup>d</sup>, Mark WOODWARD<sup>a,b</sup>,  
26 Federica BARZI<sup>a,b</sup>, Caryl NOWSON<sup>c</sup>, Victoria FLOOD<sup>e</sup>, Bruce NEAL<sup>a,b</sup>.  
27  
28

29 Affiliations: <sup>a</sup>The George Institute for Global Health, Sydney, Australia, <sup>b</sup>The University of  
30 Sydney, Sydney, Australia, <sup>c</sup>Deakin University Melbourne, Australia, <sup>d</sup>New South Wales Health,  
31 Sydney, Australia, <sup>e</sup>The University of Wollongong, Wollongong, Australia.  
32  
33  
34  
35  
36

37 TABLES: 3

38  
39 FIGURES: 1

40  
41 SUPPLEMENTARY: 0

42  
43  
44 WORD COUNT: 2907

45  
46 KEY WORDS: Salt, sodium, 24-hour urine, cardiovascular disease prevention  
47  
48  
49  
50  
51  
52  
53  
54  
55  
56  
57  
58  
59  
60

## Abstract

**Objective:** The gold standard method for measuring population sodium intake is based on a 24-hour urine collection done in a random population sample. However, because participant burden is high, response rates are typically low with less than one in four agreeing to provide specimens. At this low level of response is it possible that simply asking for volunteers would produce the same results.

**Setting:** Lithgow, New South Wales Australia.

**Participants:** We randomly selected 2152 adults and obtained usable 24-hour urine samples from 306 (response rate 16%). Specimens were also collected from a further 113 volunteers. Estimated salt consumption and the costs for each strategy were compared.

**Results:** The characteristics of the 'random' and 'volunteer' samples were moderately different in mean age 58 (standard deviation 14.6) vs. 49(17.7) years respectively;  $p < 0.001$ ) as well as self-reported alcohol use, tobacco use, history of hypertension and prescription drug use (all  $p < 0.04$ ). Overall crude mean 24-hour urinary salt excretion was 8.9(3.6)g/d in the random sample vs. 8.5(3.3)g/d for the volunteers ( $p = 0.42$ ). Corresponding age- and sex-adjusted estimates were 9.2(3.3)g/d and 8.8(3.4)g/d ( $p = 0.29$ ). Estimates for men 10.3(3.8) vs. 9.6(3.3)g/d; ( $p = 0.26$ ) and women 7.6(3.0) vs. 7.9(3.2)g/d; ( $p = 0.43$ ) were also similar for the two samples, as was salt excretion across age groups ( $p = 0.72$ ). The cost of obtaining each 24-hour urine sample was two times greater for the random compared to volunteer samples (A\$62 vs. A\$31).

**Conclusion:** The estimated salt consumption derived from the two samples was comparable and was not substantively different to estimates obtained from other surveys. In countries where salt is pervasive and cannot easily be avoided, estimates of consumption obtained from volunteer samples may be valid and less costly.

1  
2  
3  
4  
5  
6 *Article Focus* - The Global Monitoring Framework for the Prevention and Control of NCDs has  
7  
8 set a salt reduction target of 30% by 2025 for Australia. Periodic assessments of population salt  
9  
10 intake will be required to track progress towards this target. The gold standard method for  
11  
12 assessing population salt intake is the collection of 24-hour urine specimens from a random  
13  
14 population sample. However, because of the high participant burden, response rates in Australian  
15  
16 surveys requiring 24-hour urine collection are very low. When a survey response rate is very  
17  
18 low the sample obtained approximates to a volunteer sample.  
19  
20

21  
22 *Key Messages* - Population salt intake estimated from a random sample of the Lithgow  
23  
24 population with a low response rate was not different to that obtained from opportunistically  
25  
26 recruited volunteers. The comparability of the estimates from these two different survey  
27  
28 methods may be a consequence of chance or bias. However, it is possible that a volunteer  
29  
30 sample provides the same information as a random sample when the response rate is very low. If  
31  
32 this is the case, then an argument might be made for using volunteer samples that are much  
33  
34 easier and cheaper to recruit.  
35  
36  
37  
38  
39  
40

41 *Strengths and Limitations* - The sample size was small. While the random survey method using  
42  
43 24- hour urines represents what can be achieved in practice, it is not a gold standard against  
44  
45 which the validity of the volunteer sampling approach can be evaluated. However, the estimates  
46  
47 obtained were broadly in line with those anticipated. Since salt is ubiquitous in the food supply  
48  
49 and variation in consumption between individuals is driven primarily by factors that can be  
50  
51 adjusted for (age, sex and body mass index), volunteer sampling may give a fairly robust  
52  
53 estimate.  
54  
55  
56  
57  
58  
59  
60

## Background

Non-communicable diseases (NCDs) are the leading cause of death accounting for an estimated 35 million (66%) of the 53 million deaths at all ages that occurred in 2010.[1] Raised blood pressure is the leading risk factor for global disease burden, and is estimated to cause 9·4 million deaths every year—more than half of the estimated 17 million deaths a year caused by cardiovascular disease.[2] Much evidence shows that a reduction in salt intake lowers blood pressure and there is a high likelihood that this would reduce the risk of cardiovascular disease.[3] While there is not a current definitive estimate of population dietary salt intake in Australia, it is widely accepted that average consumption is between 7 and 12g/d[4] which is far above the suggested dietary target for Australians of 4g/d.[5]

The reduction of salt intake and sodium content of food has been recommended as a cost effective action that should be undertaken immediately, with expected accelerated results in terms of lives saved, cases of disease prevented and costs avoided.[6] This position has since been endorsed by the 2011 Political Declaration of the United Nations High Level Meeting on NCDs[7] which led to the development and adoption of the Global Monitoring Framework and Voluntary Global Targets for the Prevention and Control of NCDs in which salt reduction is a core target.[8]

Measurement of population salt consumption is fundamental for planning and monitoring salt reduction policies and the gold standard method is based upon a 24-hour urine collection from a random community sample. Surveys of this type are, however, complex and expensive and because participant burden is high, randomly selected community samples typically have low



1  
2  
3 response rates.[9-11] This has been noted as a significant concern at recent WHO NCD  
4  
5 surveillance, monitoring and evaluation consultation meetings in which several member states  
6  
7 have expressed doubts about the feasibility of using this method.[12] The potential adverse  
8  
9 impact that a low response rate might have on the conclusions drawn was highlighted and the  
10  
11 need for further research into practicable methods for defining and monitoring population salt  
12  
13 consumption was underlined.[12]  
14  
15  
16  
17  
18  
19

20 The objective of the present study was to measure sodium excretion using assays of 24-hour  
21  
22 urine specimens collected from a randomly selected community sample. The response rate was  
23  
24 poor, however, and a number of non-randomly selected individuals were interested in  
25  
26 participating in the study. Accordingly an opportunistic (volunteer) sample was recruited to  
27  
28 investigate whether this alternate approach to sampling might give similar results to a random  
29  
30 sample with significant non-response. The study also examined the costs associated with each  
31  
32 strategy.  
33  
34  
35  
36  
37  
38  
39

## 40 **Methods**

41  
42 The data derived from a random sample and a volunteer sample done concurrently in Lithgow,  
43  
44 New South Wales, Australia between March and June 2011. Permission to undertake the study  
45  
46 was obtained from the Lithgow City Council and the project was approved by the University of  
47  
48 Sydney Human Research Ethics Committee.  
49  
50  
51  
52  
53  
54

## 55 **Inclusion and exclusion criteria**

1  
2  
3  
4  
5  
6  
7  
8  
9  
10  
11  
12  
13  
14  
15  
16  
17  
18  
19  
20  
21  
22  
23  
24  
25  
26  
27  
28  
29  
30  
31  
32  
33  
34  
35  
36  
37  
38  
39  
40  
41  
42  
43  
44  
45  
46  
47  
48  
49  
50  
51  
52  
53  
54  
55  
56  
57  
58  
59  
60

Consenting individuals aged 20 years or above who were resident in Lithgow and listed on the 2009 Federal electoral roll were eligible for inclusion. There was no exclusion based on inter-current illness, use of medications or any other aspect of demography or personal history.

### **Selection and recruitment process**

*Random sampling* was done by selecting individuals at random from the electoral roll. The electoral roll provided the name and address of each potential participant with electronic databases searched to identify corresponding telephone numbers. Based on the assumption that approximately 25% of invited individuals would participate, 2152 individuals were selected to reach the desired sample size.

Potential participants were first mailed invitations to take part in the survey, with an explanation of the purpose of the study, a participant information sheet and a consent form provided. These individuals were then contacted by telephone to determine their willingness to participate and to schedule an interview time. Where a telephone number could not be obtained, the home address was visited by a member of the research team and willingness to participate was discussed face-to-face.

*Volunteer sampling* was done by offering participation in the study to individuals at two local shopping centres over several weeks. An information booth was established where those interested could seek further information about participation and arrange a visit by a member of the study team. Recruitment was completed at the time of the inquiry made to the study staff member manning the information booth.

### Data collection process

Data collection for randomly selected individuals and the volunteer sample was identical and commenced with a visit to the study participant by a trained research assistant. Once consent was obtained the three components of data collection, comprising a questionnaire, a physical examination and a 24-hour urine collection were initiated. The questionnaire and physical examination were completed at the time of the visit and the urine collection was scheduled to be done within the following three days.

The *questionnaire* was fully structured and administered by research assistants, with all responses based on self-report. The questionnaire recorded information on socio-demographic variables, vascular disease history and current drug treatments. Participants were asked to provide the names of regular medications but if that was not known the purpose of the medication was recorded (for example, anti-hypertensive medication).

*The physical examination* comprised measurement of body weight (using calibrated Tania HD-357 portable electronic scales (USA) and height (using a calibrated portable stadiometer Wedderburn WS-HRP model (Australia)) to the nearest 0.1kg and 0.1cm respectively, with body mass index (kg/height(m<sup>2</sup>)) then calculated. Blood pressure was measured using a manual inflation blood pressure monitor (A&D UA-&704) in triplicate, according to the American Heart Association protocol.[13]

1  
2  
3  
4  
5  
6  
7  
8  
9  
10  
11  
12  
13  
14  
15  
16  
17  
18  
19  
20  
21  
22  
23  
24  
25  
26  
27  
28  
29  
30  
31  
32  
33  
34  
35  
36  
37  
38  
39  
40  
41  
42  
43  
44  
45  
46  
47  
48  
49  
50  
51  
52  
53  
54  
55  
56  
57  
58  
59  
60

*A single 24-hour urine collection* was obtained with the first voided urine upon waking on the day of collection being discarded and participants then collecting all voided urine up to and including the first void the following morning. The time at the beginning and the end of urine collection were recorded. The urine volume was noted and the urinary sodium concentration in an aliquot was measured by ion-selective electrode with the buffered kinetic Jaffe reaction without deproteinisation used for assay of urine creatinine (Cobas Integra 400). Suspected inaccurate urine collections (i.e. urinary creatinine < 4.0 mmol/day for women, or < 6.0mmol/day for men, or a 24-hour urine collection of < 500ml for either sex) and extreme outliers for urinary creatinine (i.e. > 3 standard deviations from the mean) were excluded. The rates of exclusion were similar for the random and volunteer samples. For each individual, the 24-hour sodium excretion value (mmol/day) was calculated as the concentration of sodium in the urine (mmol/L) multiplied by the urinary volume (L/day). The conversion from mmol to grams was made by dividing by 17 and the conversion from sodium (Na) to salt (NaCl) by multiplying by 2.542.

### **Cost data**

The pre-interview costs involved staff time in selecting and attempting to reach subjects including accessing the electoral roll, sending participant invitations, follow-up phone calls and door-knocking to schedule interviews with those randomly selected, as well as setting up and manning an information booth to engage the volunteer sample. The post-interview costs comprised primarily of pathology expenses and were the same for each sample.

### **Statistical analyses**

1  
2  
3 The baseline characteristics of the sample selected at random and the volunteer sample were  
4 summarized and compared using t-tests and Chi-square tests as were their average urinary  
5 sodium values. In addition to the crude estimates described above, weighted estimates of overall  
6 population mean sodium excretion were also made in an effort to account for the non-random  
7 sampling of individuals. This was done for both the randomly selected group (to adjust for the  
8 poor response rate) and for the volunteer group (to adjust for their non-representative age and sex  
9 structure) by calculating age- and sex-specific estimates of salt excretion for 20 year age bands  
10 (20-39, 40-59, and 60 plus) for men and women and then weighting these by the age and sex  
11 structure of the population to obtain an overall estimate for the community. Regression models  
12 were fitted to explore the association between baseline participant characteristics and a range of  
13 covariates in the combined (random plus volunteer) sample. Throughout, a p-value of 0.05 or  
14 less was taken to indicate a finding unlikely to have arisen solely by chance. Statistical analyses  
15 were conducted using SPSS for Windows (Version 21, SPSS Inc, Chicago, IL) and STATA for  
16 windows (StataCorp. 2009 *Strata Statistical Software: Release 11*. College Station, TX:  
17 StataCorp LP).

## 41 **Results**

42  
43  
44  
45 Of 2,152 individuals selected by random sampling of the electoral roll, 853 (40%) were un-  
46 contactable after multiple attempts, 126 (5.8%) were ineligible because they had moved out of  
47 the study area, 5 (0.2%) had died and 843 (39%) declined to participate. The remaining 329  
48 individuals comprise the 'random' sample with a response rate of 16%. The volunteer sample  
49 comprised 120 individuals recruited consecutively at a shopping mall over a seven day period.  
50  
51  
52  
53  
54  
55

1  
2  
3 The characteristics of the random and volunteer samples were moderately different in a number of  
4 regards, including age, proportion using tobacco, alcohol use, self-reported hypertension and use  
5 of any prescription medication (Table 1).  
6  
7  
8  
9

### 10 11 12 **Crude and weighted 24-hour urinary salt excretion in random and volunteer samples**

13 For the analysis there were 306 individuals in the random sample and 113 in the volunteer group  
14 with 20 excluded because of suspected incomplete urine collections and 10 for other reasons  
15 (Figure 1). The crude mean 24-hour urinary salt excretion was 8.9 (standard deviation 3.6) g/d  
16 in the random sample and 8.5 (3.3) g/d in the volunteer group (p=0.42). The corresponding  
17 weighted estimates for the Lithgow population were 9.2 (3.9) g/d and 8.8 (3.4) g/d respectively  
18 (p=0.29).  
19  
20  
21  
22  
23  
24  
25  
26  
27  
28  
29  
30  
31

32 The proportion of randomly sampled individuals exceeding the 6 g/d recommended Maximum  
33 Level for Australians was 79%, the proportion exceeding the Australian Suggested Dietary  
34 Target of 4 g/d was 94% and the proportion exceeding the WHO Maximum Recommended  
35 Level of 5 g/d was 87%. The corresponding proportions for the volunteer group were 75%, 93%  
36 and 84%. Population-weighted estimates of these proportions were not substantively different.  
37  
38  
39  
40  
41  
42  
43  
44  
45

### 46 **24-hour urinary salt excretion in participant subgroups**

47 Urinary salt excretion in both population samples was significantly higher in men compared to  
48 women 10.3 (3.8) g/d vs. 7.6 (3.0) g/d; p<0.001 for random sample and 9.6 (3.3) g/d vs. 7.9 (3.2)  
49 g/d; p=0.006 for the volunteer sample (Table 2) and this was also true for every age group.  
50  
51  
52  
53  
54  
55 There was an inverse association between daily salt excretion and age (Table 3) such that for  
56  
57  
58  
59  
60

1  
2  
3 every decade increase in age there was 0.3g/d less excretion of salt ( $p=0.007$ ). The association  
4  
5 between salt excretion and BMI was positive with every unit rise in BMI associated with a  
6  
7 0.16g/d greater excretion of salt ( $p<0.001$ ). Similar patterns were observed in both the random  
8  
9 and volunteer population samples. There were no other significant associations observed  
10  
11 between salt excretion levels and recorded participant characteristics including education, health  
12  
13 status, tobacco use, alcohol use, blood pressure, disease history or prescription drug use (all  
14  
15  $p>0.05$ ).  
16  
17  
18  
19  
20  
21

### 22 **Costs associated with random and volunteer survey methods**

23  
24 The two main costs associated with doing the study were staff salaries and pathology expenses.  
25  
26 Due primarily to the increased staff time required for the selection and interaction with the  
27  
28 randomly selected individuals the estimated average cost associated with obtaining a valid 24-  
29  
30 hour urine sample was greater for each participant in the random sample (about AUD\$ 62)  
31  
32 compared to each participant in the volunteer sample (about AUD\$ 31).  
33  
34  
35  
36  
37  
38  
39

### 40 **Discussion**

41  
42 In this population salt intake greatly exceeds recommended levels, reaffirming the urgent need  
43  
44 for concerted action to address salt consumption in Australia. Mean salt excretion levels were  
45  
46 some 50% higher than the maximum recommended [5, 14] and only about one in every twenty  
47  
48 individuals was found to be consuming the level of salt recommended for good health. Even  
49  
50 these data are likely to be an under-estimate of the problem because the approximate 10% of salt  
51  
52 excreted by the gastro-intestinal system and the skin will have gone unrecorded.[15] An  
53  
54  
55  
56  
57  
58  
59  
60

1  
2  
3 association between blood pressure and salt intake was not observed in this study but this is  
4  
5 unsurprising - the substantial day-to-day variability in blood pressure levels and sodium  
6  
7 excretion mitigates against the detection of this association and only a much larger study or a  
8  
9 study with multiple measures of blood pressure and urinary sodium excretion would have been  
10  
11 able to reliably explore this question. The level of excess salt consumption indicated by this  
12  
13 survey would be anticipated to cause substantial disease burden in Australia leading both to large  
14  
15 numbers of lives lost prematurely and to many individuals suffering significant disability.[16]  
16  
17 With centrally managed salt reduction programs projected to deliver large population health  
18  
19 gains at very low cost [17-19], the implementation of an effective salt reduction program should  
20  
21 be a priority for the government of Australia.[20, 21]  
22  
23  
24  
25  
26  
27  
28

29 The observation that the volunteer sample produced similar findings to the random sample is of  
30  
31 interest and worthy of further exploration because it was much easier and less costly to collect  
32  
33 data from the volunteer sample than from the random sample. There are several reasons why a  
34  
35 volunteer sample might provide a similar result to a random sample when estimating population  
36  
37 salt consumption from 24-hour urine samples. First, the response rate in a random sample from  
38  
39 whom a 24-hour urine sample is sought is typically very low, averaging 20% (range 9.7% to  
40  
41 26.8%) in a series of recently reported studies.[9-11, 20] In this situation the random sample  
42  
43 effectively becomes a volunteer sample and any biases consequent upon using a volunteer  
44  
45 sample might also be apparent in the 'random' sample. That said, there were many differences  
46  
47 between the characteristics of the random and volunteer samples included in this study but these  
48  
49 did not translate into detectable differences in the observed sodium excretion. Another possible  
50  
51 explanation therefore is the ubiquitous nature of salt in the food supply[22] and the rather limited  
52  
53  
54  
55  
56  
57  
58  
59  
60



1  
2  
3 capacity of even motivated individuals to meaningfully modify their salt consumption,[23]  
4  
5 thereby minimizing the impact of any “healthy volunteer ” effect.[24] It is also possible, of  
6  
7 course, that both samples in our study were equally biased and neither gave a robust estimate of  
8  
9 true population intake. While this may be true it is of note that the estimates obtained from the  
10  
11 present study are not substantially different from prior studies in Australia [25-37] or other  
12  
13 countries with broadly similar dietary patterns[38, 39].  
14  
15  
16  
17  
18  
19

20 In some countries it may be possible to achieve better response rates[40, 41] and in others it may  
21  
22 be that specific dietary practices or other cultural factors will mean that a volunteer sample will  
23  
24 not give a good measure of true population salt intake. If, however, the findings reported here  
25  
26 are observed elsewhere and with larger populations, volunteer sampling might provide a low-  
27  
28 cost alternate to traditional random sampling techniques while maintaining the strength of 24-  
29  
30 hour urinary collection. At the very least it may be possible to use a volunteer sample to  
31  
32 demonstrate the need for action - most countries in the world are likely to have salt consumption  
33  
34 levels far above the WHO consumption target of <5g/d, and the likelihood that the selection of a  
35  
36 volunteer sample will lead to an under-recording of salt consumption of a very large magnitude  
37  
38 is probably fairly small.  
39  
40  
41  
42  
43  
44  
45

46 In addition to the baseline assessment required to justify the commencement of a salt reduction  
47  
48 strategy, ongoing monitoring of salt consumption is required to objectively determine program  
49  
50 efficacy. If the resources required to conduct high quality surveys of a random population  
51  
52 sample can be acquired then this remains the optimal approach both to baseline evaluation and  
53  
54 monitoring of progress. If not, then repeat surveys of volunteers are likely to be of value if the  
55  
56  
57  
58  
59  
60

1  
2  
3 methods used for participant selection are identical on each occasion – if the biases are the same  
4  
5 on each measurement occasion then any real rise or fall in average salt consumption should be  
6  
7 clearly apparent. However, we do not advocate for a shift to volunteer-based surveys without  
8  
9 sufficient robust evidence that our findings are repeatable.  
10  
11

12  
13  
14  
15 The cost estimates made for this study showed that recruiting the volunteer sample was a  
16  
17 significantly less expensive exercise than recruiting the random population sample. The primary  
18  
19 reason for this was the much reduced fieldwork time required for the per capita recruitment of  
20  
21 the volunteer sample. Pathology and other recorded costs were otherwise approximately the  
22  
23 same. Expenses that were not specifically determined were the costs of computer hardware,  
24  
25 computer software, the training of the field staff, and the time required for supervision by the  
26  
27 project manager. The last two of these are also likely to have been lower for the volunteer  
28  
29 sample due to the simplified and more rapid recruitment process and, as a consequence, the  
30  
31 reported difference between costs is likely to have been under-, rather than over-estimated.  
32  
33  
34  
35  
36  
37  
38

### 39 **Strengths and limitations**

40  
41 The ‘Gold Standard’ 24-hour urine method was used to measure salt intake with standard checks  
42  
43 for completeness of the specimens based upon urine volume and urine creatinine excretion. The  
44  
45 response rate for the random sample was low but comparable to other studies done in similar  
46  
47 settings over recent years.[9-11] The sample size was relatively small and results for subgroups  
48  
49 are somewhat imprecise as a consequence. It is possible, for this same reason that the study may  
50  
51 have failed to identify small, but real, differences between the sodium excretion levels  
52  
53 determined by the two different population sampling methods. The location of the study in a  
54  
55  
56  
57  
58  
59  
60

1  
2  
3 single town in a regional area of New South Wales compromises the direct generalizability of the  
4  
5 study findings to Australia as a whole, although the estimated level of salt excretion is not  
6  
7 substantively different from that reported in a number of diverse population groups throughout  
8  
9 the country.[25-37]  
10  
11  
12  
13

## 14 15 **Conclusion**

16  
17  
18 These data affirm that current efforts to reduce salt intake in Australia are failing, with a large  
19  
20 majority of the population studied consuming more than the recommended Australian Upper  
21  
22 Limit of 6g/d and almost everyone eating more than the Suggested Dietary Target of 4g/day.  
23  
24 The observation that an opportunistically recruited volunteer population sample may provide a  
25  
26 reasonable estimate of salt intake is worthy of further investigation because this could  
27  
28 substantially reduce the cost of future monitoring efforts for some countries.  
29  
30  
31  
32  
33  
34  
35  
36  
37  
38  
39  
40  
41  
42  
43  
44  
45  
46  
47  
48  
49  
50  
51  
52  
53  
54  
55  
56  
57  
58  
59  
60

**TABLE 1. CHARACTERISTICS OF RANDOM AND VOLUNTEER SAMPLES**

|                                                             | Random sample<br>(n=306) | Volunteer sample<br>(n=113) | p-value |
|-------------------------------------------------------------|--------------------------|-----------------------------|---------|
| Female (%)                                                  | 52.9                     | 61.9                        | 0.10    |
| Age, years (mean)                                           | 57.6                     | 49.3                        | <0.001  |
| Height, cm (mean)                                           | 167.5                    | 167.6                       | 0.85    |
| Weight, kg (mean)                                           | 81.8                     | 83.9                        | 0.30    |
| BMI, kg/m <sup>2</sup> (mean)                               | 29.1                     | 29.8                        | 0.27    |
| Systolic bp, mmHg (mean)                                    | 126.7                    | 123.7                       | 0.16    |
| Diastolic bp, mmHg (mean)                                   | 78.7                     | 78.9                        | 0.88    |
| Education                                                   |                          |                             | 0.22    |
| -Secondary (%)                                              | 63.7                     | 55.8                        |         |
| -Tertiary (%)                                               | 25.5                     | 32.7                        |         |
| -Postgraduate (%)                                           | 10.8                     | 11.5                        |         |
| Health Status                                               |                          |                             | 0.21    |
| -Very good (%)                                              | 50.3                     | 48.7                        |         |
| -Good (%)                                                   | 29.4                     | 23.9                        |         |
| -Fair (%)                                                   | 20.2                     | 27.4                        |         |
| Current smoker (> 1 / day) (%)                              | 8.2                      | 22.1                        | <0.001  |
| Ever smoked (> 1 / day) (%)                                 | 41.2                     | 53.1                        | 0.03    |
| Alcoholic consumption (time since last consumption)         |                          |                             | 0.04    |
| One week or less (%)                                        | 62.1                     | 42.5                        |         |
| > one week < 12months (%)                                   | 19.9                     | 34.5                        |         |
| 12 months or more (%)                                       | 11.1                     | 10.6                        |         |
| Never (%)                                                   | 6.9                      | 12.4                        |         |
| Have you ever been told by a doctor or nurse that you have: |                          |                             |         |
| -high blood pressure (%)                                    | 44.1                     | 30.1                        | 0.03    |
| -low blood pressure (%)                                     | 15.4                     | 14.2                        | 0.76    |
| -high cholesterol (%)                                       | 37.3                     | 30.0                        | 0.16    |
| -heart attack (%)                                           | 8.2                      | 3.5                         | 0.10    |
| -stroke (%)                                                 | 3.9                      | 1.8                         | 0.37    |
| -angina (%)                                                 | 6.9                      | 4.4                         | 0.36    |
| -diabetes (%)                                               | 11.1                     | 7.1                         | 0.26    |
| Prescription Medication Use*                                |                          |                             |         |
| Antihypertensive (%)                                        | 15.4                     | 15.0                        | 0.54    |
| Lipid lowering (%)                                          | 11.1                     | 7.1                         | 0.62    |
| Aspirin (%)                                                 | 8.8                      | 2.7                         | 0.06    |
| Glucose lowering (%)                                        | 22.5                     | 7.1                         | 0.17    |
| Any prescription medication (%)                             | 73.9                     | 59.2                        | 0.02    |

\*Participants could be taking more than one prescribed medication

TABLE 2. URINARY SALT EXCRETION (GRAMS/DAY)

|                                                      | Random sample<br>(n=306) |              | Volunteer sample<br>(n=113) |              | P value     |
|------------------------------------------------------|--------------------------|--------------|-----------------------------|--------------|-------------|
|                                                      | Mean                     | (SD)         | Mean                        | (SD)         |             |
| <b>Overall crude</b>                                 | <b>8.9</b>               | <b>(3.6)</b> | <b>8.5</b>                  | <b>(3.3)</b> | <b>0.42</b> |
| <b>Overall weighted*</b>                             | <b>9.2</b>               | <b>(3.9)</b> | <b>8.8</b>                  | <b>(3.4)</b> | <b>0.29</b> |
| Female                                               |                          |              |                             |              | 0.27        |
| 20-39                                                | 8.7                      | (4)          | 7.9                         | (2.9)        |             |
| 40-59                                                | 8.0                      | (3.1)        | 7.8                         | (3.8)        |             |
| 60+                                                  | 6.8                      | (2.4)        | 7.9                         | (2.6)        |             |
| All female                                           | 7.6                      | (3)          | 7.9                         | (3.2)        |             |
| Male                                                 |                          |              |                             |              | 0.40        |
| 20-39                                                | 10.8                     | (4.7)        | 10.5                        | (3.9)        |             |
| 40-59                                                | 11.1                     | (4.2)        | 9.8                         | (3.0)        |             |
| 60+                                                  | 9.7                      | (3.1)        | 8.6                         | (3.0)        |             |
| All male                                             | 10.3                     | (3.8)        | 9.6                         | (3.3)        |             |
| Education                                            |                          |              |                             |              | 0.25        |
| Secondary                                            | 9.1                      | (3.7)        | 8.9                         | (3.4)        |             |
| Tertiary                                             | 8.3                      | (3.0)        | 8.5                         | (3.3)        |             |
| Post graduate                                        | 8.4                      | (3.6)        | 8.0                         | (3.3)        |             |
| Health Status                                        |                          |              |                             |              | 0.89        |
| Very Good                                            | 8.7                      | (3.8)        | 8.0                         | (2.9)        |             |
| Good                                                 | 8.8                      | (3.5)        | 9.3                         | (3.7)        |             |
| Fair                                                 | 8.7                      | (2.8)        | 8.3                         | (2.6)        |             |
| Current Smoker                                       | 9.0                      | (3.8)        | 8.8                         | (3.4)        | 0.82        |
| Ever Smoked                                          | 8.8                      | (3.6)        | 9.0                         | (3.6)        | 0.74        |
| Alcohol Consumption<br>(time since last consumption) |                          |              |                             |              | 0.45        |
| One week or less                                     | 8.8                      | (3.8)        | 8.7                         | (3.8)        |             |
| > one week < 12months                                | 8.6                      | (3.2)        | 8.7                         | (2.9)        |             |
| 12 months or more                                    | 9.3                      | (3.8)        | 7.8                         | (2.8)        |             |
| Never                                                | 9.1                      | (3.2)        | 8.1                         | (3.6)        |             |

\*Adjusted for response rate (random sample) and non-random selection (volunteer sample) by weighting age-and sex-specific estimates to the age and sex structure of the Lithgow population

**TABLE 3. COST OF RANDOM COMPARED TO VOLUNTEER SAMPLING (AUD)**

|                              | Random Sample(n=306) | Volunteer Sample(n=113) |
|------------------------------|----------------------|-------------------------|
| Pre-interview costs          |                      |                         |
| Sampling from electoral roll | \$2,152              | 0                       |
| Scheduling interviews        | \$8,704              | \$1,088                 |
| Post-interview costs         |                      |                         |
| Pathology costs              | \$4,211              | \$1,584                 |
| Other costs                  |                      |                         |
| Postage                      | \$2,169              | 0                       |
| Telephone                    | \$1,870              | \$818                   |
| Shopping centre stand fee    |                      | \$10                    |
| <b>TOTAL</b>                 | <b>\$19,106</b>      | <b>\$3,500</b>          |
| <b>COST PER PARTICIPANT*</b> | <b>\$62.44</b>       | <b>\$30.96</b>          |

\*Cost per participant calculated by dividing total cost by the number of valid participants in each sample.

## Figure legend

### FIGURE 1. RECRUITMENT OF STUDY SAMPLES

## Acknowledgments

The authors thank Lithgow City Council, the Nepean Blue Mountains Local Area Health Network for their support and most importantly all of the participants for their support and interest in the study.

## Sources of support

This work was supported by a National Health and Medical Research Council (NHMRC) of Australia partnership project (Neal #13372) which includes The George Institute for Global Health in partnership with the Australian Division of World Action on Salt and Health; the Australian Food and Grocery Council; the New South Wales Food Authority; and New South Wales Health. Bruce Neal was supported by an Australian Research Council Future Fellowship and an NHMRC Fellowship, Mark Woodward by a NHMRC Fellowship and Jacqui Webster by a National Heart Foundation and Stroke Foundation postdoctoral research fellowship.

## Contributorship Statement

All authors fulfill the ICMJE guidelines for authorship and have approved the final version of the manuscript submitted to BMJ Open.

Mary-Anne Land - contributed to study concept and design, data collection, analysis and interpretation of the data, drafting the article and final version of the article.

1  
2  
3 Jacqui Webster - contributed to the study design, revising content and final approval of the  
4  
5 version to be published.  
6  
7

8  
9  
10 Anthea Christoforou – contributed to the analysis of data, revising content and final approval of  
11  
12 the version to be published  
13

14  
15 D Praveen – contributed to the analysis and interpretation of data, revising content and final  
16  
17 approval of the version to be published.  
18

19  
20 Paul Jeffery – contributed to the study design, interpretation of data, revising content and final  
21  
22 approval of the version to be published.  
23

24  
25 John Chalmers – contributed to the conception and study design, revising critically and final  
26  
27 approval of the version to be published.  
28

29  
30 Wayne Smith - contributed to the conception and study design, revising critically and final  
31  
32 approval of the version to be published.  
33

34  
35 Mark Woodward – contributed to the conception and study design, revising critically and final  
36  
37 approval of the version to be published.  
38

39  
40 Federica Barzi – contributed to the analysis and interpretation of the data, revising critically and  
41  
42 final approval of the version to be published.  
43

44  
45 Caryl Nowson - contributed to the conception and study design, revising critically and final  
46  
47 approval of the version to be published.  
48

49  
50 Victoria Flood - contributed to the conception and study design, revising critically and final  
51  
52 approval of the version to be published.  
53

54  
55 Bruce Neal – contributed to the conception and study design, analysis and interpretation of data,  
56  
57 drafting of the article, revising critically and final approval of the version to be published.  
58



1  
2  
3  
4  
5  
6  
7  
8  
9  
10  
11 **Conflicts of interest**

12 J.W. is the co-ordinator, and B.N. is the Chairman of the Australian Division of World Action on  
13 Salt and Health.  
14

15  
16  
17 **Data Sharing Statement**

18  
19  
20  
21 Additional data if available - please email Mary-Anne Land: [maland@georgeinstitute.org.au](mailto:maland@georgeinstitute.org.au)  
22  
23  
24  
25  
26  
27  
28  
29  
30  
31  
32  
33  
34  
35  
36  
37  
38  
39  
40  
41  
42  
43  
44  
45  
46  
47  
48  
49  
50  
51  
52  
53  
54  
55  
56  
57  
58  
59  
60

## References

1. Lozano, R., et al., *Global and regional mortality from 235 causes of death for 20 age groups in 1990 and 2010: a systematic analysis for the Global Burden of Disease Study 2010*. Lancet, 2012. **380**(9859): p. 2095-128.
2. Lim, S.S., et al., *A comparative risk assessment of burden of disease and injury attributable to 67 risk factors and risk factor clusters in 21 regions, 1990-2010: a systematic analysis for the Global Burden of Disease Study 2010*. Lancet, 2012. **380**(9859): p. 2224-60.
3. He, F.J., N.R. Campbell, and G.A. MacGregor, *Reducing salt intake to prevent hypertension and cardiovascular disease*. Rev Panam Salud Publica, 2012. **32**(4): p. 293-300.
4. Keogh, J.B. and P.M. Clifton, *Salt intake and health in the Australian population*. Med J Aust, 2008. **189**(9): p. 526.
5. National Health and Medical Research Council, *Nutrient Reference Values for Australia and New Zealand*, 2006, Department of Health and Ageing.
6. The World Health Organization, *2008-2013 Action Plan for the Global Strategy for the Prevention and Control of Noncommunicable Diseases*, 2008.
7. United Nations. *2011 High Level Meeting on Prevention and Control of Non-communicable Diseases*. 2011. Available from: <http://www.un.org/en/ga/ncdmeeting2011/>.
8. The World Health Organization, *Formal meeting of Member States to conclude the work on the comprehensive global monitoring framework, including indicators, and a set of voluntary global targets for the prevention and control of noncommunicable diseases Geneva, 5–7 November 2012*, 2012: Geneva.
9. Ribic, C.H., et al., *Salt intake of the Slovene population assessed by 24 h urinary sodium excretion*. Public Health Nutr, 2010. **13**(11): p. 1803-9.

10. Chappuis, A., et al., *Swiss survey on salt intake: main results*. 2011.
11. Ortega, R.M., et al., *Estimation of salt intake by 24 h urinary sodium excretion in a representative sample of Spanish adults*. *Br J Nutr*, 2011. **105**(5): p. 787-94.
12. The World Health Organization, *European Regional Technical Consultation on Noncommunicable Disease Surveillance, Monitoring and Evaluation*. 2012.
13. Perloff, D., et al., *Human blood pressure determination by sphygmomanometry*. *Circulation*, 1993. **88**(5 Pt 1): p. 2460-70.
14. The World Health Organization, *Reducing Salt Intake in Populations*, in *Report of a WHO Forum and Technical Meeting 2007*, World Health Organisation: Geneva.
15. Kirkendall, A.M., et al., *The effect of dietary sodium chloride on blood pressure, body fluids, electrolytes, renal function, and serum lipids of normotensive man*. *J Lab Clin Med*, 1976. **87**(3): p. 411-34.
16. Cobiac, L.J., et al., *Which interventions offer best value for money in primary prevention of cardiovascular disease?* *PLoS One*, 2012. **7**(7): p. e41842.
17. Beaglehole, R., et al., *UN High-Level Meeting on Non-Communicable Diseases: addressing four questions*. *Lancet*, 2011. **378**(9789): p. 449-55.
18. National Heart Foundation of Australia, *Summary of evidence statement on the relationships between dietary electrolytes and cardiovascular disease*.  
<http://www.heartfoundation.org.au/SiteCollectionDocuments/Dietary-Electrolytes-CVD-Summary-Evidence.pdf>, 2006.
19. Cook, N.R., et al., *Long term effects of dietary sodium reduction on cardiovascular disease outcomes: observational follow-up of the trials of hypertension prevention (TOHP)*. *BMJ*, 2007. **334**(7599): p. 885-8.

- 1  
2  
3 20. Brown, I.J., et al., *Salt intakes around the world: implications for public health*. Int J  
4  
5 Epidemiol, 2009. **38**(3): p. 791-813.
- 6  
7  
8 21. Bibbins-Domingo, K., et al., *Projected Effect of Dietary Salt Reductions on Future*  
9  
10 *Cardiovascular Disease*. N Engl J Med, 2010: p. NEJMoa0907355.
- 11  
12 22. Webster, J.L., E.K. Dunford, and B.C. Neal, *A systematic survey of the sodium contents of*  
13  
14 *processed foods*. Am J Clin Nutr, 2010. **91**(2): p. 413-20.
- 15  
16  
17 23. Kumanyika, S., *Behavioral aspects of intervention strategies to reduce dietary sodium*.  
18  
19 Hypertension, 1991. **17**(1 Suppl): p. I190-5.
- 20  
21 24. Lindsted, K.D., et al., *Healthy volunteer effect in a cohort study: temporal resolution in the*  
22  
23 *Adventist Health Study*. J Clin Epidemiol, 1996. **49**(7): p. 783-90.
- 24  
25  
26 25. Beard, T.C., et al., *The Hobart Salt Study 1995: few meet national sodium intake target*.  
27  
28 Med J Aust, 1997. **166**(8): p. 404-7.
- 29  
30  
31 26. Jones, G., et al., *A population-based study of the relationship between salt intake, bone*  
32  
33 *resorption and bone mass*. Eur J Clin Nutr, 1997. **51**(8): p. 561-5.
- 34  
35  
36 27. Bao, D.Q., et al., *Effects of dietary fish and weight reduction on ambulatory blood pressure*  
37  
38 *in overweight hypertensives*. Hypertension, 1998. **32**(4): p. 710-7.
- 39  
40  
41 28. Mori, Y., et al., *Effect of highly purified eicosapentaenoic acid ethyl ester on insulin*  
42  
43 *resistance and hypertension in Dahl salt-sensitive rats*. Metabolism, 1999. **48**(9): p. 1089-  
44  
45 95.
- 46  
47  
48 29. Cumming, R.G., P. Mitchell, and W. Smith, *Dietary sodium intake and cataract: the Blue*  
49  
50 *Mountains Eye Study*. Am J Epidemiol, 2000. **151**(6): p. 624-6.
- 51  
52  
53 30. Nowson, C.A., T.O. Morgan, and C. Gibbons, *Decreasing dietary sodium while following a*  
54  
55 *self-selected potassium-rich diet reduces blood pressure*. J Nutr, 2003. **133**(12): p. 4118-23.
- 56  
57  
58  
59  
60

- 1  
2  
3  
4  
5  
6  
7  
8  
9  
10  
11  
12  
13  
14  
15  
16  
17  
18  
19  
20  
21  
22  
23  
24  
25  
26  
27  
28  
29  
30  
31  
32  
33  
34  
35  
36  
37  
38  
39  
40  
41  
42  
43  
44  
45  
46  
47  
48  
49  
50  
51  
52  
53  
54  
55  
56  
57  
58  
59  
60
31. Nowson, C.A., et al., *Blood pressure response to dietary modifications in free-living individuals*. J Nutr, 2004. **134**(9): p. 2322-9.
  32. Ward, N.C., et al., *Oxidative stress in human hypertension: association with antihypertensive treatment, gender, nutrition, and lifestyle*. Free Radic Biol Med, 2004. **36**(2): p. 226-32.
  33. Hodgson, J.M., et al., *Partial substitution of carbohydrate intake with protein intake from lean red meat lowers blood pressure in hypertensive persons*. Am J Clin Nutr, 2006. **83**(4): p. 780-7.
  34. Margerison, C. and C. Nowson, *Dietary intake and 24-hour excretion of sodium and potassium*. Asia Pac J Clin Nutr, 2006. **15**: p. S37.
  35. Julie Boorman, J.C., Dorothy Mackerras., *Salt Intake From Processed Food and Discretionary Use in Australia*. Food Standards Australia New Zealand, ACT Australia Available at: [http://www.foodstandards.gov.au/\\_srcfiles/Salt\\_Intake\\_5.pdf](http://www.foodstandards.gov.au/_srcfiles/Salt_Intake_5.pdf)
  36. Brinkworth, G.D., et al., *Reductions in blood pressure following energy restriction for weight loss do not rebound after re-establishment of energy balance in overweight and obese subjects*. Clin Exp Hypertens, 2008. **30**(5): p. 385-96.
  37. Charlton, K., et al., *Urinary sodium excretion, dietary sources of sodium intake and knowledge and practices around salt use in a group of healthy Australian women*. Aust N Z J Public Health, 2010. **34**(4): p. 356-63.
  38. Sadler, K., et al. *National Diet and Nutrition Survey - Assessment of Dietary Sodium in Adults (Aged 19–64 Years) in England, 2011*. . 2012; Available from: [https://www.gov.uk/government/uploads/system/uploads/attachment\\_data/file/213420/Sodium-Survey-England-2011\\_Text\\_to-DH\\_FINAL1.pdf](https://www.gov.uk/government/uploads/system/uploads/attachment_data/file/213420/Sodium-Survey-England-2011_Text_to-DH_FINAL1.pdf).

- 1  
2  
3 39. He, J., et al., *Dietary sodium intake and subsequent risk of cardiovascular disease in*  
4 *overweight adults*. JAMA, 1999. **282**(21): p. 2027-34.  
5  
6  
7  
8 40. Tuomilehto, J., et al., *Community-based prevention of hypertension in North Karelia,*  
9 *Finland*. Ann Clin Res, 1984. **16 Suppl 43**: p. 18-27.  
10  
11  
12 41. Staessen, J., et al., *Salt intake and blood pressure in the general population: a controlled*  
13 *intervention trial in two towns*. J Hypertens, 1988. **6**(12): p. 965-73.  
14  
15  
16  
17  
18  
19  
20  
21  
22  
23  
24  
25  
26  
27  
28  
29  
30  
31  
32  
33  
34  
35  
36  
37  
38  
39  
40  
41  
42  
43  
44  
45  
46  
47  
48  
49  
50  
51  
52  
53  
54  
55  
56  
57  
58  
59  
60

---

## SALT INTAKE ASSESSED BY 24-HOUR URINARY SODIUM EXCRETION IN A RANDOM AND OPPORTUNISTIC SAMPLE IN AUSTRALIA

*Corresponding Author:*

Miss Mary-Anne Land  
The George Institute for Global Health  
PO BOX M201 Missenden Road  
Camperdown, NSW, AUSTRALIA  
2050.  
T: +61 2 9993 4547  
E: [maland@georgeinstitute.org.au](mailto:maland@georgeinstitute.org.au)

Authors: Mary-Anne LAND<sup>a,b</sup>, Jacqui, WEBSTER<sup>a,b</sup>, Anthea, CHRISTOFOROU<sup>a,b</sup>, D  
PRAVEEN<sup>a,b</sup>, Paul JEFFERY<sup>c</sup>, John CHALMERS<sup>a,b</sup>, Wayne SMITH<sup>d</sup>, Mark  
WOODWARD<sup>a,b</sup>, Federica BARZI<sup>a,b</sup>, Caryl NOWSON<sup>c</sup>, Victoria FLOOD<sup>e</sup>, Bruce NEAL<sup>a,b</sup>.

Affiliations: <sup>a</sup>The George Institute for Global Health, Sydney, Australia, <sup>b</sup>The University of  
Sydney, Sydney, Australia, <sup>c</sup>Deakin University Melbourne, Australia, <sup>d</sup>New South Wales  
Health, Sydney, Australia, <sup>e</sup>The University of Wollongong, Wollongong, Australia.

TABLES: 3

FIGURES: 1

SUPPLEMENTARY: 0

WORD COUNT: 2907

KEY WORDS: Salt, sodium, 24-hour urine, cardiovascular disease prevention

1  
2  
3 *Article Focus* - The Global Monitoring Framework for the Prevention and Control of NCDs  
4  
5 has set a salt reduction target of 30% by 2025 for Australia. ~~The Periodic~~ assessments of  
6  
7 population salt intake will underpins the implementation of salt reduction policies and  
8  
9 evaluates progress ~~be required to track progress towards this target.~~ The gold standard  
10  
11 method for assessing population salt intake is the collection of ~~a~~ 24-hour urine specimens  
12  
13 from a random population sample. However, because of the high participant burden,  
14  
15 ~~participation response~~ rates in Australian surveys requiring 24-hour urine collection are  
16  
17 generally very low and the cost is often high. When a survey response rate is very low the  
18  
19 sample obtained approximates to a volunteer sample. ~~Hence there is great interest in~~  
20  
21 alternative, yet robust and affordable methods to assess salt intake.  
22  
23  
24  
25  
26  
27

28  
29 *Key Messages* - Population salt intake estimated from a ~~The observation that an random~~  
30  
31 sample of the Lithgow population with a low response rate was not different to that  
32  
33 obtained from opportunistically recruited volunteers ~~population sample appears to provide a~~  
34  
35 reasonable estimate of salt intake is important ~~noteworthy.~~ The comparability of the  
36  
37 estimates from these two different survey methods may be a consequence of chance or bias.  
38  
39 However, it is possible that a volunteer sample provides the same information as a random  
40  
41 sample when the response rate is very low. ~~because this could substantially reduce the cost~~  
42  
43 of future ~~increase the feasibility of monitoring efforts.~~ If ~~If~~ this is the case, then an  
44  
45 argument might be made for using volunteer samples that are much easier and cheaper to  
46  
47 recruit. ~~this finding was repeated in other settings this would have global implications, as~~  
48  
49 the reporting of salt intake in 2015, 2020 and 2025 is encouraged as part of the Global  
50  
51 Monitoring Framework for the Prevention and Control of NCDs.  
52  
53  
54  
55  
56  
57  
58  
59  
60



## Abstract

**IntroductionObjective:** The gold standard method for measuring population sodium intake is based on a 24-hour urine collection done in a random population sample. However, because participant burden is high, response rates are typically low with less than one in four agreeing to provide specimens. At this low level of response is it possible that simply asking for volunteers would produce ~~equally valid~~ the same results.

**MethodSetting:** Lithgow, New South Wales Australia.

**Participants:** We randomly selected 2152 adults ~~\_from Lithgow, New South Wales\_~~ and obtained usable 24-hour urine samples from 306 (response rate 16%). Specimens were also collected from a further 113 volunteers. Estimated salt consumption and the costs for each strategy were compared.

**Results:** The characteristics of the 'random' and 'volunteer' samples were moderately different in mean age 58 (standard deviation 14.6) vs. 49(17.7) years respectively;  $p<0.001$ ) as well as self-reported alcohol use, tobacco use, history of hypertension and prescription drug use (all  $p<0.04$ ). Overall crude mean 24-hour urinary salt excretion was 8.9(3.6)~~(g/d)~~ in the random sample vs. 8.5(3.3)g/d for the volunteers ( $p=0.42$ ). Corresponding age- and sex-adjusted estimates were 9.2(3.3)g/d and 8.8(3.4)g/d ( $p=0.29$ ). Estimates for men 10.3(3.8) vs. 9.6(3.3)g/d; ( $p=0.26$ ) and women 7.6(3.0) vs. 7.9(3.2)g/d; ( $p=0.43$ ) were also similar for the two samples, as was salt excretion across age groups ( $p=0.72$ ). The cost of obtaining each 24-hour urine sample was two times greater for the random compared to volunteer samples (A\$62 vs. A\$31).

**Conclusion:** The estimated salt consumption derived from the two samples was comparable and was not substantively different to estimates obtained from other surveys.

1  
2  
3 In countries where salt is pervasive and cannot easily be avoided, estimates of consumption  
4  
5 obtained from volunteer samples may be valid and less costly.  
6  
7  
8

9  
10 *Strengths and Limitations* - The ~~'Gold Standard' 24-hour urine method was used to~~  
11 ~~estimate sodium intake~~am. The response rate for the random sample was low and the study  
12 ~~location was a single town but the response rate and estimated level of salt excretion is not~~  
13 ~~substantively different from that reported in a number of diverse population groups~~  
14 ~~throughout the country~~ sample size was small. While the random survey method using 24-  
15 hour urines represents what can be achieved in practice, it is not a gold standard against  
16 which the validity of the volunteer sampling approach can be evaluated. However, the  
17 estimates obtained were broadly in line with those anticipated. Since salt is ubiquitous in  
18 the food supply and variation in consumption between individuals is driven primarily by  
19 factors that can be adjusted for (age, sex and body mass index), volunteer sampling may  
20 give a fairly robust estimate.-  
21  
22  
23  
24  
25  
26  
27  
28  
29  
30  
31  
32  
33  
34  
35  
36  
37  
38  
39  
40  
41  
42  
43  
44  
45  
46  
47  
48  
49  
50  
51  
52  
53  
54  
55  
56  
57  
58  
59  
60

## Background

Non-communicable diseases (NCDs) are the leading cause of death accounting for an estimated 35 million (66%) of the 53 million deaths at all ages that occurred in 2010.[1]

Raised blood pressure is the leading risk factor for global disease burden, and is estimated to cause 9·4 million deaths every year—more than half of the estimated 17 million deaths a year caused by cardiovascular disease.[2] Much evidence shows that a reduction in salt intake lowers blood pressure and there is a high likelihood that this would reduce the risk of cardiovascular disease.[3] While there is not a current definitive estimate of population dietary salt intake in Australia, it is widely accepted that average consumption is between 7 and 12g/d[4] which is far above the suggested dietary target for Australians of 4g/d.[5]

The reduction of salt intake and sodium content of food has been ~~strongly~~ recommended as a cost effective action that should be undertaken immediately, with expected accelerated results in terms of lives saved, cases of disease prevented and costs avoided.[6] This position has since been ~~historically~~ endorsed by the 2011 Political Declaration of the United Nations High Level Meeting on NCDs[7] which led to the development and adoption of the Global Monitoring Framework and Voluntary Global Targets for the Prevention and Control of NCDs in which salt reduction is a core target.[8]

Measurement of population salt consumption is fundamental for planning and monitoring salt reduction policies and the gold standard method is based upon a 24-hour urine collection from a random community sample. Surveys of this type are, however, complex and expensive and because participant burden is high, randomly selected community

1  
2  
3 samples typically have low response rates.[9-11] This has been noted as a significant  
4  
5 concern at recent WHO NCD surveillance, monitoring and evaluation consultation  
6  
7 meetings in which several member states have expressed doubts about the feasibility of  
8  
9 using this method.[12] The potential adverse impact that a low response rate might have on  
10  
11 the conclusions drawn was highlighted and the need for further research into practicable  
12  
13 methods for defining and monitoring population salt consumption was underlined.[12]  
14  
15  
16  
17  
18

19 The objective of the present study was to measure sodium excretion using assays of 24-  
20  
21 hour urine ~~samples-specimens~~ collected from a randomly selected regional Australian  
22  
23 community populationsample. ~~The response rate was poor, however, and -a number of non-~~  
24  
25 randomly selected individuals were interested in participating in the study. For this  
26  
27 reason ~~Accordingly an opportunistic (volunteer) sample was recruited to investigate the~~  
28  
29 feasibility of a random sample with a poor response rate in which to allwhether this  
30  
31 alternate approach to sampling might give similar results to a random sample with  
32  
33 significant non-response-intents and purposes the random samples are volunteer samples  
34  
35 with an opportunistic sample. ~~- A key question about practicality was addressed by using~~  
36  
37 both a standard random sampling approach to make the estimate while simultaneously  
38  
39 recruiting an opportunistic (volunteer) sample to make an alternate estimate. ~~The study also~~  
40  
41 examined the costs associated with each strategy.:-  
42  
43  
44  
45  
46  
47  
48  
49  
50

## 51 **Methods**

52  
53  
54 The data derived from a random sample and a convenience-volunteer sample (volunteers)  
55  
56 done concurrently in Lithgow, New South Wales, Australia between March and June 2011.  
57  
58  
59  
60

1  
2  
3 Permission to undertake the study was obtained from the Lithgow City Council and the  
4  
5 project was approved by the University of Sydney Human Research Ethics Committee.  
6  
7

### 8 9 10 **Inclusion and exclusion criteria**

11  
12 Consenting individuals aged 20 years or above who were resident in Lithgow and listed on  
13  
14 the 2009 Federal electoral roll were eligible for inclusion. There was no exclusion based on  
15  
16 inter-current illness, use of medications or any other aspect of demography or personal  
17  
18 history.  
19  
20

### 21 22 23 **Selection and recruitment process**

24  
25 *Random sampling* was done by selecting individuals at random from the electoral roll. The  
26  
27 electoral roll provided the name and address of each potential participant with electronic  
28  
29 databases searched to identify corresponding telephone numbers. Based on the assumption  
30  
31 that approximately 25% of invited individuals would participate, 2152 individuals were  
32  
33 selected to reach the desired sample size.  
34  
35  
36  
37

38  
39  
40 Potential participants were first mailed invitations to take part in the survey, with an  
41  
42 explanation of the purpose of the study, a participant information sheet and a consent form  
43  
44 provided. These individuals were then contacted by telephone to determine their  
45  
46 willingness to participate and to schedule an interview time. Where a telephone number  
47  
48 could not be obtained, the home address was visited by a member of the research team and  
49  
50 willingness to participate was discussed face-to-face.  
51  
52  
53  
54  
55  
56  
57  
58  
59  
60

1  
2  
3 *Volunteer sampling* was done by offering participation in the study to individuals at two  
4 local shopping centres over several weeks. An information booth was established where  
5 those interested could seek further information about participation and arrange a visit by a  
6 member of the study team. Recruitment was completed at the time of the inquiry made to  
7 the study staff member manning the information booth.  
8  
9

### 16 17 **Data collection process**

18  
19 Data collection for randomly selected individuals and the volunteer sample was identical  
20 and commenced with a visit to the study participant by a trained research assistant. Once  
21 consent was obtained the three components of data collection, comprising a questionnaire, a  
22 physical examination and a 24-hour urine collection were initiated. The questionnaire and  
23 physical examination were completed at the time of the visit and the urine collection was  
24 scheduled to be done within the following three days.  
25  
26  
27  
28  
29  
30  
31  
32  
33  
34  
35

36 The *questionnaire* was fully structured and administered by research assistants, with all  
37 responses based on self-report. The questionnaire recorded information on socio-  
38 demographic variables, vascular disease history and current drug treatments. Participants  
39 were asked to provide the names of regular medications but if that was not known the  
40 purpose of the medication was recorded (for example, anti-hypertensive medication).  
41  
42  
43  
44  
45  
46  
47  
48  
49

50 *The physical examination* comprised measurement of body weight (using calibrated Tantia  
51 HD-357 portable electronic scales (USA) and height (using a calibrated portable  
52 stadiometer Wedderburn WS-HRP model (Australia)) to the nearest 0.1kg and 0.1cm  
53  
54  
55  
56  
57  
58  
59  
60

1  
2  
3 respectively, with body mass index (kg/height(m<sup>2</sup>)) then calculated. Blood pressure was  
4  
5 measured using a manual inflation blood pressure monitor (A&D UA-&704) in triplicate,  
6  
7 according to the American Heart Association protocol.[13]  
8  
9

10  
11  
12 *A single 24-hour urine collection* was obtained with the first voided urine upon waking on  
13  
14 the day of collection being discarded and participants then collecting all voided urine up to  
15  
16 and including the first void the following morning. The time at the beginning and the end  
17  
18 of urine collection were recorded. The urine volume was noted and the urinary sodium  
19  
20 concentration in an aliquot was measured by ion-selective electrode with the buffered  
21  
22 kinetic Jaffe reaction without deproteinisation used for assay of urine creatinine (Cobas  
23  
24 Integra 400). Suspected inaccurate urine collections (i.e. urinary creatinine < 4.0 mmol/day  
25  
26 for women, or < 6.0mmol/day for men, or a 24-hour urine collection of < 500ml for either  
27  
28 sex) and extreme outliers for urinary creatinine (i.e. > 3 standard deviations from the mean)  
29  
30 were excluded. The rates of exclusion were similar for the random and volunteer samples.  
31  
32 For each individual, the 24-hour sodium excretion value (mmol/day) was calculated as the  
33  
34 concentration of sodium in the urine (mmol/L) multiplied by the urinary volume (L/day).  
35  
36 The conversion from mmol to grams was made by dividing by 17 and the conversion from  
37  
38 sodium (Na) to salt (NaCl) by multiplying by 2.542.  
39  
40  
41  
42  
43  
44  
45  
46  
47

#### 48 **Cost data**

49  
50 The pre-interview costs involved staff time in selecting and attempting to reach subjects  
51  
52 including accessing the electoral roll, sending participant invitations, follow-up phone calls  
53  
54 and door-knocking to schedule interviews with those randomly selected, as well as setting  
55  
56

1  
2  
3 up and manning an information booth to engage the volunteer sample. The post-interview  
4  
5 costs comprised primarily of pathology expenses and were the same for each sample.  
6  
7  
8

### 9 10 **Statistical analyses**

11  
12 The baseline characteristics of the sample selected at random and the volunteer sample  
13  
14 were summarized and compared using t-tests and Chi-square tests as were their average  
15  
16 urinary sodium values. In addition to the crude estimates described above, weighted  
17  
18 estimates of overall population mean sodium excretion were also made in an effort to  
19  
20 account for the non-random sampling of individuals. This was done for both the randomly  
21  
22 selected group (to adjust for the poor response rate) and for the volunteer group (to adjust  
23  
24 for their non-representative age and sex structure) by calculating age- and sex-specific  
25  
26 estimates of salt excretion for 20 year age bands (20-39, 40-59, and 60 plus) for men and  
27  
28 women and then weighting these by the age and sex structure of the population to obtain an  
29  
30 overall estimate for the community. Regression models were fitted to explore the  
31  
32 association between baseline participant characteristics and a range of covariates in the  
33  
34 combined (random plus volunteer) sample. Throughout, a p-value of 0.05 or less was taken  
35  
36 to indicate a finding unlikely to have arisen solely by chance. Statistical analyses were  
37  
38 conducted using SPSS for Windows (Version 21, SPSS Inc, Chicago, IL) and STATA for  
39  
40 windows (StataCorp. 2009 *Strata Statistical Software: Release 11*. College Station, TX:  
41  
42 StataCorp LP).  
43  
44  
45  
46  
47  
48  
49  
50  
51  
52  
53  
54  
55  
56  
57  
58  
59  
60



## Results

Of 2,152 individuals selected by random sampling of the electoral roll, 853 (40%) were uncontactable after multiple attempts, 126 (5.8%) were ineligible because they had moved out of the study area, 5 (0.2%) had died and 843 (39%) declined to participate. The remaining 329 individuals comprise the 'random' sample with a response rate of 16%. The volunteer sample comprised 120 individuals recruited consecutively at a shopping mall over a seven day period. The characteristics of the random and volunteer samples were moderately different in a number of regards, including age, proportion using tobacco~~use~~, alcohol use~~-~~, self-reported hypertension and use of any prescription medication (Table 1).

### Crude and weighted 24-hour urinary salt excretion in random and volunteer samples

For the analysis there were 306 individuals in the random sample and 113 in the volunteer group with 20 excluded because of suspected incomplete urine collections and 10 for other reasons (Figure 1). The crude mean 24-hour urinary salt excretion was 8.9 (standard deviation 3.6) g/d in the random sample and 8.5 (3.3) g/d in the volunteer group ( $p=0.42$ ). The corresponding weighted estimates for the Lithgow population were 9.2 (3.9) g/d and 8.8 (3.4) g/d respectively ( $p=0.29$ ).

The proportion of randomly sampled individuals exceeding the 6 g/d recommended Maximum Level for Australians was 79%, the proportion exceeding the Australian Suggested Dietary Target of 4 g/d was 94% and the proportion exceeding the WHO Maximum Recommended Level of 5 g/d was 87%. The corresponding proportions for the

1  
2  
3 volunteer group were 75%, 93% and 84%. Population-weighted estimates of these  
4  
5 proportions were not substantively different.  
6  
7

### 8 9 **24-hour urinary salt excretion in participant subgroups**

10  
11 Urinary salt excretion in both population samples was significantly higher in men compared  
12  
13 to women 10.3 (3.8) g/d vs. 7.6 (3.0) g/d;  $p<0.001$  for random sample and 9.6 (3.3) g/d vs.  
14  
15 7.9 (3.2) g/d;  $p=0.006$  for the volunteer sample (Table 2) and this was also true for every  
16  
17 age group. There was an inverse association between daily salt excretion and age (Table 2)  
18  
19 such that for every decade increase in age there was 0.3g/d less excretion of salt ( $p=0.007$ ).  
20  
21 The association between salt excretion and BMI was positive with every unit rise in BMI  
22  
23 associated with a 0.16g/d greater excretion of salt ( $p<0.001$ ). Similar patterns were  
24  
25 observed in both the random and volunteer population samples. There were no other  
26  
27 significant associations observed between salt excretion levels and recorded participant  
28  
29 characteristics including education, health status, tobacco use, alcohol use, blood pressure,  
30  
31 disease history or prescription drug use (all  $p>0.05$ ).  
32  
33  
34  
35  
36  
37  
38  
39  
40

### 41 **Costs associated with random and volunteer survey methods**

42  
43 The two main costs associated with doing the study were staff salaries and pathology  
44  
45 expenses. Due primarily to the increased staff time required for the selection and  
46  
47 interaction with the randomly selected individuals the estimated average cost associated  
48  
49 with obtaining a valid 24-hour urine sample was greater for each participant in the random  
50  
51 sample (about AUD\$ 62) compared to each participant in the volunteer sample (about  
52  
53 AUD\$ 31).  
54  
55  
56  
57  
58  
59  
60

## Discussion

In this population salt intake greatly exceeds ~~the~~ recommended levels, reaffirming the urgent need for concerted action to address salt consumption in Australia. Mean salt excretion levels were some 50% higher than the maximum recommended ~~levels~~[5, 14] and only about one in every twenty individuals was found to be consuming the level of salt recommended for good health. Even these data are likely to be an under-estimate of the problem because the approximate 10% of salt excreted by the gastro-intestinal system and the skin will have gone unrecorded.[15] An association between blood pressure and salt intake was not observed in this study but this is unsurprising - the substantial day-to-day variability in blood pressure levels and sodium excretion mitigates against the detection of this association and only a much larger study or a study with multiple measures of blood pressure and urinary sodium excretion would have been able to reliably explore this question. The level of excess salt consumption indicated by this survey would be anticipated to cause substantial disease burden in Australia leading both to large numbers of lives lost prematurely and to many individuals suffering significant disability.[16] With centrally ~~implemented~~-managed salt reduction programs projected to deliver large population health gains at very low cost [17-19], the implementation of an effective salt reduction program should be a priority for the government of Australia.[20, 21]

The observation that the volunteer sample produced similar findings to the random sample is of interest ~~potentially important~~ and worthy of further exploration because it was much easier and less costly to collect data from the volunteer sample than from the random

1  
2  
3 sample. ~~F~~There are several reasons why a volunteer sample might provide a similar result  
4  
5 to a random sample when estimating population salt consumption from 24-hour urine  
6  
7 samples. First, the response rate in a random sample from whom a 24-hour urine sample is  
8  
9 sought is typically very low, averaging 20% (range 9.7% to 26.8%) in a series of recently  
10  
11 reported studies.[9-11, 20] In this situation the random sample effectively becomes a  
12  
13 volunteer sample and any biases consequent upon using a volunteer sample might also be  
14  
15 apparent in the ‘random’ sample. That said, there were many differences between the  
16  
17 characteristics of the random and volunteer samples included in this study but these did not  
18  
19 translate into detectable differences in the observed sodium excretion. Another possible  
20  
21 explanation therefore is the ubiquitous nature of salt in the food supply[22] and the rather  
22  
23 limited capacity of even motivated individuals to meaningfully modify their salt  
24  
25 consumption,[23] thereby minimizing the impact of any ‘‘healthy volunteer’’ effect.[24] It  
26  
27 is also possible, of course, that both samples in our study were equally biased and neither  
28  
29 gave a robust estimate of true population intake. While this may be true it is of note that  
30  
31 the estimates obtained from the present study are not substantially different from prior  
32  
33 studies in Australia [25-37] or other countries with broadly similar dietary patterns[38, 39].  
34  
35  
36  
37  
38  
39  
40  
41  
42

43 In some countries it may be possible to achieve better response rates[40, 41] and in others it  
44  
45 may be that specific dietary practices or other cultural factors will mean that a volunteer  
46  
47 sample will not give a good measure of true population salt intake. If, however, the  
48  
49 findings reported here ~~are observed elsewhere~~ are observed elsewhere and with larger  
50  
51 populations, volunteer sampling might provide a low-cost alternate to traditional random  
52  
53 sampling techniques while maintaining the strength of 24-hour urinary collection. At the  
54  
55  
56  
57  
58  
59  
60

1  
2  
3 very least it may be possible to use a volunteer sample to demonstrate the need for action -  
4  
5 most countries in the world are likely to have salt consumption levels far above the WHO  
6  
7 consumption target of <5g/d, and the likelihood that the selection of a volunteer sample will  
8  
9 lead to an under-recording of salt consumption of a very large magnitude is probably fairly  
10  
11 small.  
12  
13

14  
15  
16  
17 In addition to the baseline assessment required to justify the commencement of a salt  
18  
19 reduction strategy, ongoing monitoring of salt consumption is required to objectively  
20  
21 determine program efficacy. If the resources required to conduct high quality surveys of a  
22  
23 random population sample can be acquired then this remains the optimal approach both to  
24  
25 baseline evaluation and monitoring of progress. If not, then repeat surveys of volunteers  
26  
27 are likely to be of value if the methods used for participant selection are identical on each  
28  
29 occasion – if the biases are the same on each measurement occasion then any real rise or  
30  
31 fall in average salt consumption should be clearly apparent. However, we do not advocate  
32  
33 for a shift to volunteer-based surveys without sufficient robust evidence that our findings  
34  
35 are repeatable.  
36  
37  
38  
39  
40  
41

42  
43 The cost estimates made for this study showed that recruiting the volunteer sample was a  
44  
45 significantly less expensive exercise than recruiting the random population sample. The  
46  
47 primary reason for this was the much reduced fieldwork time required for the per capita  
48  
49 recruitment of the volunteer sample. Pathology and other recorded costs were otherwise  
50  
51 approximately the same. Expenses that were not specifically determined were the costs of  
52  
53 computer hardware, computer software, the training of the field staff, and the time required  
54  
55  
56  
57  
58  
59  
60

1  
2  
3 for supervision by the project manager. The last two of these are also likely to have been  
4  
5 lower for the volunteer sample due to the simplified and more rapid recruitment process  
6  
7 and, as a consequence, the reported difference between costs is likely to have been under-,  
8  
9 rather than over-estimated.  
10

### 11 12 13 14 **Strengths and limitations**

15  
16 The 'Gold Standard' 24-hour urine method was used to measure salt intake with standard  
17  
18 checks for completeness of the specimens based upon urine volume and urine creatinine  
19  
20 excretion. The response rate for the random sample was low but comparable to other  
21  
22 studies done in similar settings over recent years.[9-11] The sample size was relatively  
23  
24 small and results for subgroups are somewhat imprecise as a consequence. It is possible,  
25  
26 for this same reason that the study may have failed to identify small, but real, differences  
27  
28 between the sodium excretion levels determined by the two different population sampling  
29  
30 methods. The location of the study in a single town in a regional area of New South Wales  
31  
32 compromises the direct generalizability of the study findings to Australia as a whole,  
33  
34 although the estimated level of salt excretion is not substantively different from that  
35  
36 reported in a number of diverse population groups throughout the country.[25-37]  
37  
38  
39  
40  
41  
42  
43  
44

### 45 **Conclusion**

46  
47 These data affirm that current efforts to reduce salt intake in Australia are failing, with a  
48  
49 large majority of the population studied consuming more than the recommended Australian  
50  
51 Upper Limit of 6g/d and almost everyone eating more than the Suggested Dietary Target of  
52  
53 4g/day. The observation that an opportunistically recruited volunteer population sample  
54  
55  
56  
57  
58  
59  
60

1  
2  
3 ~~appears mayto~~ provide a reasonable estimate of salt intake is ~~important worthy of further~~  
4 ~~investigation~~ because this could substantially reduce the cost of future monitoring efforts  
5  
6  
7 ~~for some countries. If this finding was repeated in other settings this would have global~~  
8 ~~implications because sodium salt reduction has been proposed to all Mmember sStates by~~  
9 ~~the WHO. Most countries, however, have very limited resources available and any~~  
10 ~~reduction in program cost that can be achieved without seriously adversely affecting~~  
11 ~~program quality will be an important step forward. Although the study design was~~  
12 ~~imperfect, including the limitation of a moderate difference in the participant~~  
13 ~~characteristics, substantial heterogeneity in estimated salt consumption levels is not usually~~  
14 ~~observed between groups unless measures of age, sex or body mass index are substantively~~  
15 ~~different between populations. With population-based salt reduction strategies already~~  
16 ~~shown to be cost effective or cost saving in most settings, these new data further support~~  
17 ~~the feasibility of widespread rollout of national salt reduction efforts around the world.~~  
18  
19  
20  
21  
22  
23  
24  
25  
26  
27  
28  
29  
30  
31  
32  
33  
34  
35  
36  
37  
38  
39  
40  
41  
42  
43  
44  
45  
46  
47  
48  
49  
50  
51  
52  
53  
54  
55  
56  
57  
58  
59  
60

**TABLE 1. CHARACTERISTICS OF RANDOM AND VOLUNTEER SAMPLES**

|                                                             | Random sample<br>(n=306) | Volunteer sample<br>(n=113) | p-value |
|-------------------------------------------------------------|--------------------------|-----------------------------|---------|
| Female (%)                                                  | 52.9                     | 61.9                        | 0.10    |
| Age, years (mean)                                           | 57.6                     | 49.3                        | <0.001  |
| Height, cm (mean)                                           | 167.5                    | 167.6                       | 0.85    |
| Weight, kg (mean)                                           | 81.8                     | 83.9                        | 0.30    |
| BMI, kg/m <sup>2</sup> (mean)                               | 29.1                     | 29.8                        | 0.27    |
| Systolic bp, mmHg (mean)                                    | 126.7                    | 123.7                       | 0.16    |
| Diastolic bp, mmHg (mean)                                   | 78.7                     | 78.9                        | 0.88    |
| Education                                                   |                          |                             | 0.22    |
| -Secondary (%)                                              | 63.7                     | 55.8                        |         |
| -Tertiary (%)                                               | 25.5                     | 32.7                        |         |
| -Postgraduate (%)                                           | 10.8                     | 11.5                        |         |
| Health Status                                               |                          |                             | 0.21    |
| -Very good (%)                                              | 50.3                     | 48.7                        |         |
| -Good (%)                                                   | 29.4                     | 23.9                        |         |
| -Fair (%)                                                   | 20.2                     | 27.4                        |         |
| Current smoker (> 1 / day) (%)                              | 8.2                      | 22.1                        | <0.001  |
| Ever smoked (> 1 / day) (%)                                 | 41.2                     | 53.1                        | 0.03    |
| Alcoholic consumption (time since last consumption)         |                          |                             | 0.04    |
| One week or less (%)                                        | 62.1                     | 42.5                        |         |
| > one week < 12months (%)                                   | 19.9                     | 34.5                        |         |
| 12 months or more (%)                                       | 11.1                     | 10.6                        |         |
| Never (%)                                                   | 6.9                      | 12.4                        |         |
| Have you ever been told by a doctor or nurse that you have: |                          |                             |         |
| -high blood pressure (%)                                    | 44.1                     | 30.1                        | 0.03    |
| -low blood pressure (%)                                     | 15.4                     | 14.2                        | 0.76    |
| -high cholesterol (%)                                       | 37.3                     | 30.0                        | 0.16    |
| -heart attack (%)                                           | 8.2                      | 3.5                         | 0.10    |
| -stroke (%)                                                 | 3.9                      | 1.8                         | 0.37    |
| -angina (%)                                                 | 6.9                      | 4.4                         | 0.36    |
| -diabetes (%)                                               | 11.1                     | 7.1                         | 0.26    |
| Prescription Medication Use*                                |                          |                             |         |
| Antihypertensive (%)                                        | 15.4                     | 15.0                        | 0.54    |
| Lipid lowering (%)                                          | 11.1                     | 7.1                         | 0.62    |
| Aspirin (%)                                                 | 8.8                      | 2.7                         | 0.06    |
| Glucose lowering (%)                                        | 22.5                     | 7.1                         | 0.17    |
| Any prescription medication (%)                             | 73.9                     | 59.2                        | 0.02    |

\*Participants could be taking more than one prescribed medication



TABLE 2. URINARY SALT EXCRETION (GRAMS/DAY)

|                                                      | Random sample<br>(n=306) |              | Volunteer sample<br>(n=113) |              | P value     |
|------------------------------------------------------|--------------------------|--------------|-----------------------------|--------------|-------------|
|                                                      | Mean                     | (SD)         | Mean                        | (SD)         |             |
| <b>Overall crude</b>                                 | <b>8.9</b>               | <b>(3.6)</b> | <b>8.5</b>                  | <b>(3.3)</b> | <b>0.42</b> |
| <b>Overall weighted*</b>                             | <b>9.2</b>               | <b>(3.9)</b> | <b>8.8</b>                  | <b>(3.4)</b> | <b>0.29</b> |
| Female                                               |                          |              |                             |              | 0.27        |
| 20-39                                                | 8.7                      | (4)          | 7.9                         | (2.9)        |             |
| 40-59                                                | 8.0                      | (3.1)        | 7.8                         | (3.8)        |             |
| 60+                                                  | 6.8                      | (2.4)        | 7.9                         | (2.6)        |             |
| All female                                           | 7.6                      | (3)          | 7.9                         | (3.2)        |             |
| Male                                                 |                          |              |                             |              | 0.40        |
| 20-39                                                | 10.8                     | (4.7)        | 10.5                        | (3.9)        |             |
| 40-59                                                | 11.1                     | (4.2)        | 9.8                         | (3.0)        |             |
| 60+                                                  | 9.7                      | (3.1)        | 8.6                         | (3.0)        |             |
| All male                                             | 10.3                     | (3.8)        | 9.6                         | (3.3)        |             |
| Education                                            |                          |              |                             |              | 0.25        |
| Secondary                                            | 9.1                      | (3.7)        | 8.9                         | (3.4)        |             |
| Tertiary                                             | 8.3                      | (3.0)        | 8.5                         | (3.3)        |             |
| Post graduate                                        | 8.4                      | (3.6)        | 8.0                         | (3.3)        |             |
| Health Status                                        |                          |              |                             |              | 0.89        |
| Very Good                                            | 8.7                      | (3.8)        | 8.0                         | (2.9)        |             |
| Good                                                 | 8.8                      | (3.5)        | 9.3                         | (3.7)        |             |
| Fair                                                 | 8.7                      | (2.8)        | 8.3                         | (2.6)        |             |
| Current Smoker                                       | 9.0                      | (3.8)        | 8.8                         | (3.4)        | 0.82        |
| Ever Smoked                                          | 8.8                      | (3.6)        | 9.0                         | (3.6)        | 0.74        |
| Alcohol Consumption<br>(time since last consumption) |                          |              |                             |              | 0.45        |
| One week or less                                     | 8.8                      | (3.8)        | 8.7                         | (3.8)        |             |
| > one week < 12months                                | 8.6                      | (3.2)        | 8.7                         | (2.9)        |             |
| 12 months or more                                    | 9.3                      | (3.8)        | 7.8                         | (2.8)        |             |
| Never                                                | 9.1                      | (3.2)        | 8.1                         | (3.6)        |             |

\*Adjusted for response rate (random sample) and non-random selection (volunteer sample) by weighting age-and sex-specific estimates to the age and sex structure of the Lithgow population

**TABLE 3. COST OF RANDOM COMPARED TO VOLUNTEER SAMPLING (AUD)**

|                              | <b>Random<br/>Sample(n=306)</b> | <b>Volunteer<br/>Sample(n=113)</b> |
|------------------------------|---------------------------------|------------------------------------|
| Pre-interview costs          |                                 |                                    |
| Sampling from electoral roll | \$2,152                         | 0                                  |
| Scheduling interviews        | \$8,704                         | \$1,088                            |
| Post-interview costs         |                                 |                                    |
| Pathology costs              | \$4,211                         | \$1,584                            |
| Other costs                  |                                 |                                    |
| Postage                      | \$2,169                         | 0                                  |
| Telephone                    | \$1,870                         | \$818                              |
| Shopping centre stand fee    |                                 | \$10                               |
| <b>TOTAL</b>                 | <b>\$19,106</b>                 | <b>\$3,500</b>                     |
| <b>COST PER PARTICIPANT*</b> | <b>\$62.44</b>                  | <b>\$30.96</b>                     |

\*Cost per participant calculated by dividing total cost by the number of valid participants in each sample.

FIGURE 1. RECRUITMENT OF STUDY SAMPLES

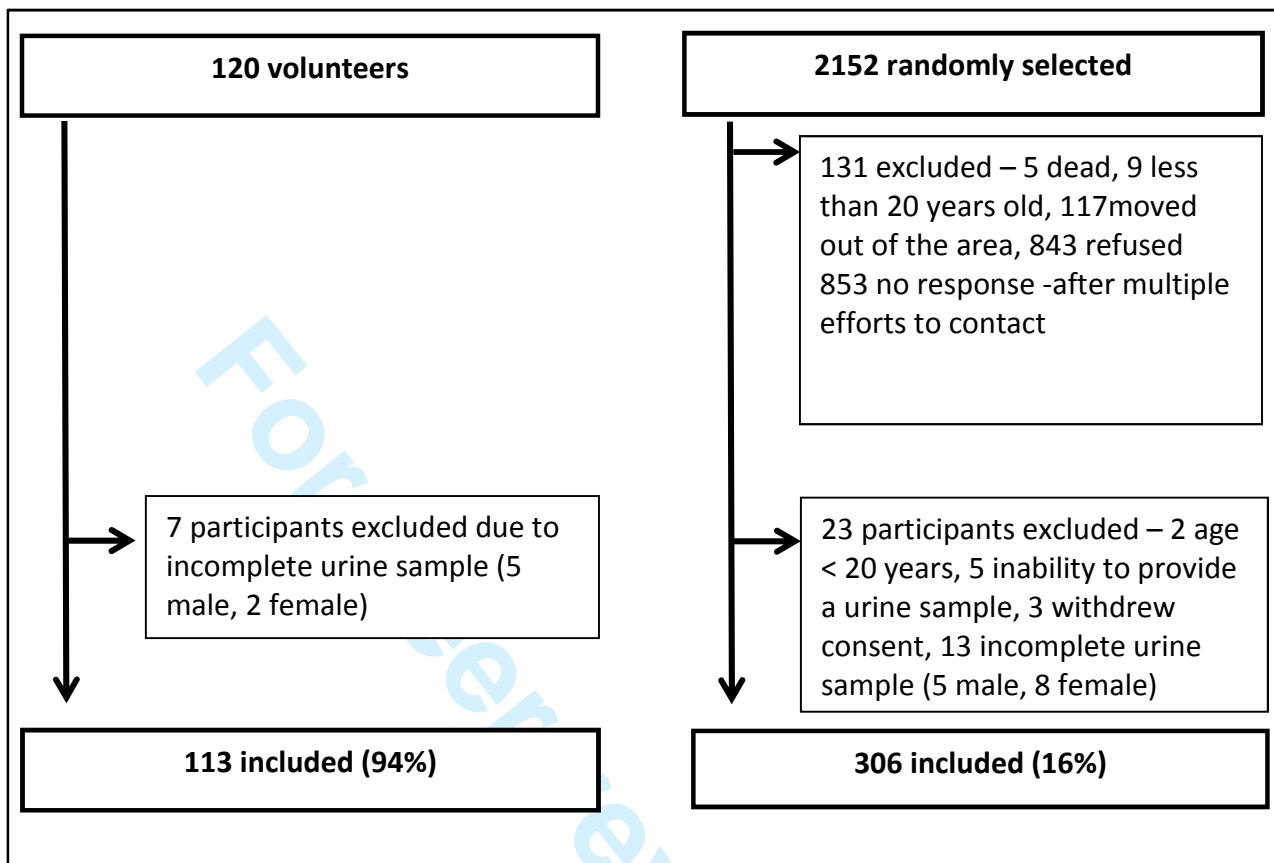

## Acknowledgments

The authors thank Lithgow City Council, the Nepean Blue Mountains Local Area Health Network for their support and most importantly all of the participants for their support and interest in the study.

## Sources of support

This work was supported by a National Health and Medical Research Council (NHMRC) of Australia partnership project (Neal #13372) which includes The George Institute for Global Health in partnership with the Australian Division of World Action on Salt and Health; the Australian Food and Grocery Council; the New South Wales Food Authority; and New South Wales Health. Bruce Neal was supported by an Australian Research Council Future Fellowship and an NHMRC Fellowship, Mark Woodward by a NHMRC Fellowship and Jacqui Webster by a National Heart Foundation and Stroke Foundation postdoctoral research fellowship.

## Conflicts of interest

J.W. is the co-ordinator, and B.N. is the Chairman of the Australian Division of World Action on Salt and Health.

## References

1. Lozano, R., et al., *Global and regional mortality from 235 causes of death for 20 age groups in 1990 and 2010: a systematic analysis for the Global Burden of Disease Study 2010*. Lancet, 2012. **380**(9859): p. 2095-128.
2. Lim, S.S., et al., *A comparative risk assessment of burden of disease and injury attributable to 67 risk factors and risk factor clusters in 21 regions, 1990-2010: a systematic analysis for the Global Burden of Disease Study 2010*. Lancet, 2012. **380**(9859): p. 2224-60.
3. He, F.J., N.R. Campbell, and G.A. MacGregor, *Reducing salt intake to prevent hypertension and cardiovascular disease*. Rev Panam Salud Publica, 2012. **32**(4): p. 293-300.
4. Keogh, J.B. and P.M. Clifton, *Salt intake and health in the Australian population*. Med J Aust, 2008. **189**(9): p. 526.
5. National Health and Medical Research Council, *Nutrient Reference Values for Australia and New Zealand*, 2006, Department of Health and Ageing.
6. The World Health Organization, *2008-2013 Action Plan for the Global Strategy for the Prevention and Control of Noncommunicable Diseases*, 2008.
7. United Nations. *2011 High Level Meeting on Prevention and Control of Non-communicable Diseases*. 2011. Available from: <http://www.un.org/en/ga/ncdmeeting2011/>.
8. The World Health Organization, *Formal meeting of Member States to conclude the work on the comprehensive global monitoring framework, including indicators, and a set of voluntary global targets for the prevention and control of noncommunicable diseases Geneva, 5–7 November 2012*, 2012: Geneva.
9. Ribic, C.H., et al., *Salt intake of the Slovene population assessed by 24 h urinary sodium excretion*. Public Health Nutr, 2010. **13**(11): p. 1803-9.

10. Chappuis, A., et al., *Swiss survey on salt intake: main results*. 2011.
11. Ortega, R.M., et al., *Estimation of salt intake by 24 h urinary sodium excretion in a representative sample of Spanish adults*. *Br J Nutr*, 2011. **105**(5): p. 787-94.
12. The World Health Organization, *European Regional Technical Consultation on Noncommunicable Disease Surveillance, Monitoring and Evaluation*. 2012.
13. Perloff, D., et al., *Human blood pressure determination by sphygmomanometry*. *Circulation*, 1993. **88**(5 Pt 1): p. 2460-70.
14. The World Health Organization, *Reducing Salt Intake in Populations*, in *Report of a WHO Forum and Technical Meeting 2007*, World Health Organisation: Geneva.
15. Kirkendall, A.M., et al., *The effect of dietary sodium chloride on blood pressure, body fluids, electrolytes, renal function, and serum lipids of normotensive man*. *J Lab Clin Med*, 1976. **87**(3): p. 411-34.
16. Cobiac, L.J., et al., *Which interventions offer best value for money in primary prevention of cardiovascular disease?* *PLoS One*, 2012. **7**(7): p. e41842.
17. Beaglehole, R., et al., *UN High-Level Meeting on Non-Communicable Diseases: addressing four questions*. *Lancet*, 2011. **378**(9789): p. 449-55.
18. National Heart Foundation of Australia, *Summary of evidence statement on the relationships between dietary electrolytes and cardiovascular disease*.  
<http://www.heartfoundation.org.au/SiteCollectionDocuments/Dietary-Electrolytes-CVD-Summary-Evidence.pdf>, 2006.
19. Cook, N.R., et al., *Long term effects of dietary sodium reduction on cardiovascular disease outcomes: observational follow-up of the trials of hypertension prevention (TOHP)*. *BMJ*, 2007. **334**(7599): p. 885-8.

- 1  
2  
3 20. Brown, I.J., et al., *Salt intakes around the world: implications for public health*. Int J  
4 Epidemiol, 2009. **38**(3): p. 791-813.
- 5  
6  
7 21. Bibbins-Domingo, K., et al., *Projected Effect of Dietary Salt Reductions on Future*  
8 *Cardiovascular Disease*. N Engl J Med, 2010: p. NEJMoA0907355.
- 9  
10  
11 22. Webster, J.L., E.K. Dunford, and B.C. Neal, *A systematic survey of the sodium contents of*  
12 *processed foods*. Am J Clin Nutr, 2010. **91**(2): p. 413-20.
- 13  
14  
15 23. Kumanyika, S., *Behavioral aspects of intervention strategies to reduce dietary sodium*.  
16 Hypertension, 1991. **17**(1 Suppl): p. I190-5.
- 17  
18  
19 24. Lindsted, K.D., et al., *Healthy volunteer effect in a cohort study: temporal resolution in the*  
20 *Adventist Health Study*. J Clin Epidemiol, 1996. **49**(7): p. 783-90.
- 21  
22  
23 25. Beard, T.C., et al., *The Hobart Salt Study 1995: few meet national sodium intake target*.  
24 Med J Aust, 1997. **166**(8): p. 404-7.
- 25  
26  
27 26. Jones, G., et al., *A population-based study of the relationship between salt intake, bone*  
28 *resorption and bone mass*. Eur J Clin Nutr, 1997. **51**(8): p. 561-5.
- 29  
30  
31 27. Bao, D.Q., et al., *Effects of dietary fish and weight reduction on ambulatory blood pressure*  
32 *in overweight hypertensives*. Hypertension, 1998. **32**(4): p. 710-7.
- 33  
34  
35 28. Mori, Y., et al., *Effect of highly purified eicosapentaenoic acid ethyl ester on insulin*  
36 *resistance and hypertension in Dahl salt-sensitive rats*. Metabolism, 1999. **48**(9): p. 1089-  
37 95.
- 38  
39  
40 29. Cumming, R.G., P. Mitchell, and W. Smith, *Dietary sodium intake and cataract: the Blue*  
41 *Mountains Eye Study*. Am J Epidemiol, 2000. **151**(6): p. 624-6.
- 42  
43  
44 30. Nowson, C.A., T.O. Morgan, and C. Gibbons, *Decreasing dietary sodium while following a*  
45 *self-selected potassium-rich diet reduces blood pressure*. J Nutr, 2003. **133**(12): p. 4118-23.
- 46  
47  
48  
49  
50  
51  
52  
53  
54  
55  
56  
57  
58  
59  
60

- 1  
2  
3  
4  
5  
6  
7  
8  
9  
10  
11  
12  
13  
14  
15  
16  
17  
18  
19  
20  
21  
22  
23  
24  
25  
26  
27  
28  
29  
30  
31  
32  
33  
34  
35  
36  
37  
38  
39  
40  
41  
42  
43  
44  
45  
46  
47  
48  
49  
50  
51  
52  
53  
54  
55  
56  
57  
58  
59  
60
31. Nowson, C.A., et al., *Blood pressure response to dietary modifications in free-living individuals*. J Nutr, 2004. **134**(9): p. 2322-9.
  32. Ward, N.C., et al., *Oxidative stress in human hypertension: association with antihypertensive treatment, gender, nutrition, and lifestyle*. Free Radic Biol Med, 2004. **36**(2): p. 226-32.
  33. Hodgson, J.M., et al., *Partial substitution of carbohydrate intake with protein intake from lean red meat lowers blood pressure in hypertensive persons*. Am J Clin Nutr, 2006. **83**(4): p. 780-7.
  34. Margerison, C. and C. Nowson, *Dietary intake and 24-hour excretion of sodium and potassium*. Asia Pac J Clin Nutr, 2006. **15**: p. S37.
  35. Julie Boorman, J.C., Dorothy Mackerras., *Salt Intake From Processed Food and Discretionary Use in Australia*. Food Standards Australia New Zealand, ACT Australia Available at: [http://www.foodstandards.gov.au/\\_srcfiles/Salt\\_Intake\\_5.pdf](http://www.foodstandards.gov.au/_srcfiles/Salt_Intake_5.pdf)
  36. Brinkworth, G.D., et al., *Reductions in blood pressure following energy restriction for weight loss do not rebound after re-establishment of energy balance in overweight and obese subjects*. Clin Exp Hypertens, 2008. **30**(5): p. 385-96.
  37. Charlton, K., et al., *Urinary sodium excretion, dietary sources of sodium intake and knowledge and practices around salt use in a group of healthy Australian women*. Aust N Z J Public Health, 2010. **34**(4): p. 356-63.
  38. Sadler, K., et al. *National Diet and Nutrition Survey - Assessment of Dietary Sodium in Adults (Aged 19–64 Years) in England, 2011*. . 2012; Available from: [https://www.gov.uk/government/uploads/system/uploads/attachment\\_data/file/213420/Sodium-Survey-England-2011\\_Text\\_to-DH\\_FINAL1.pdf](https://www.gov.uk/government/uploads/system/uploads/attachment_data/file/213420/Sodium-Survey-England-2011_Text_to-DH_FINAL1.pdf).



- 1  
2  
3 39. He, J., et al., *Dietary sodium intake and subsequent risk of cardiovascular disease in*  
4 *overweight adults*. JAMA, 1999. **282**(21): p. 2027-34.  
5  
6  
7  
8 40. Tuomilehto, J., et al., *Community-based prevention of hypertension in North Karelia,*  
9 *Finland*. Ann Clin Res, 1984. **16 Suppl 43**: p. 18-27.  
10  
11  
12 41. Staessen, J., et al., *Salt intake and blood pressure in the general population: a controlled*  
13 *intervention trial in two towns*. J Hypertens, 1988. **6**(12): p. 965-73.  
14  
15  
16  
17  
18  
19  
20  
21  
22  
23  
24  
25  
26  
27  
28  
29  
30  
31  
32  
33  
34  
35  
36  
37  
38  
39  
40  
41  
42  
43  
44  
45  
46  
47  
48  
49  
50  
51  
52  
53  
54  
55  
56  
57  
58  
59  
60

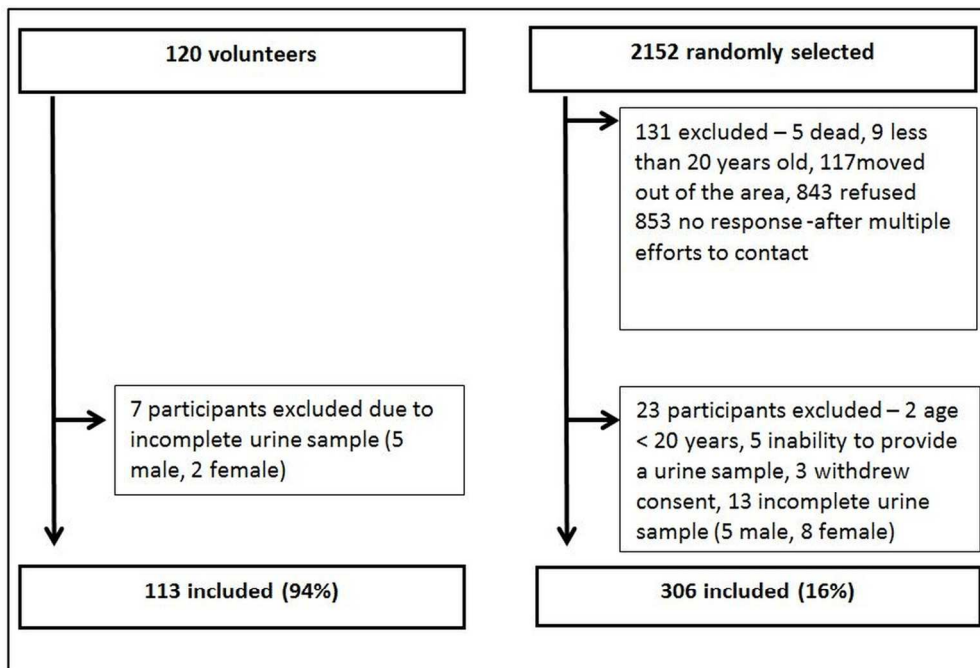

132x90mm (300 x 300 DPI)

1  
2  
3  
4  
5  
6  
7  
8  
9  
10  
11  
12  
13  
14  
15  
16  
17  
18  
19  
20  
21  
22  
23  
24  
25  
26  
27  
28  
29  
30  
31  
32  
33  
34  
35  
36  
37  
38  
39  
40  
41  
42  
43  
44  
45  
46  
47  
48  
49  
50  
51  
52  
53  
54  
55  
56  
57  
58  
59  
60
